# Supplementary material for: Synthesis and anion binding properties of (thio)urea functionalized Ni( ii )-salen complexes
Source: Royal Society of Chemistry journal article supplement (doi:10.1039/d4dt02683g), 2024-11-01
Supplement: d4dt02683g1.pdf [file d4dt02683g1.pdf]

## Supplementary Information

for

### Synthesis and anion binding properties of (thio)urea functionalized Ni(II)-salen complexes

Jae Elise L. Payong<sup>a</sup>, Nadia G. Léonard<sup>b</sup>, Lauren M. Anderson-Sanchez<sup>a</sup>, Joseph W. Ziller<sup>a</sup> and Jenny Y. Yang<sup>a†</sup>

<sup>a</sup> *Department of Chemistry, University of California, Irvine, Irvine, California 92697, USA*

<sup>b</sup> *Department of Chemistry and Biochemistry, University of California, Santa Barbara, Santa Barbara, California 93106, United States.*

† Corresponding Author.

#### Table of Contents

|                                                  |    |
|--------------------------------------------------|----|
| Experimental Methods.....                        | 2  |
| Synthetic Procedures.....                        | 3  |
| Crystallographic Information.....                | 8  |
| Titration Curves and Relevant NMR Spectra .....  | 20 |
| Job Plots.....                                   | 36 |
| Diffusion Ordered Spectroscopy (DOSY) Plots..... | 41 |
| Copies of NMR Spectra.....                       | 47 |
| References.....                                  | 58 |

## Experimental Methods

Synthetic reactions were performed in air unless stated otherwise. Commercially sourced chemicals were used as received unless stated otherwise. Deuterated solvents were purchased from Cambridge Isotope Laboratories. Tetrabutylammonium salts for titration experiments were stored in a desiccator. Air- and moisture-sensitive manipulations were performed using Schlenk line techniques under N<sub>2</sub> atmosphere. Glassware and stir bars used in air- and moisture-sensitive manipulations were dried in a Quincy Lab Inc. Model 40GC Lab Oven for at least 1 hour at 350 °F (177 °C). Dry and degassed solvents were obtained from an Ar-pressurized solvent purification system (JC Meyer Solvent Systems) equipped with an alumina drying column and stored over activated 3 Å molecular sieves (3 - 4 mm (0.04 - 0.08 in), ThermoFisher) inside a Vacuum Atmospheres Company (VAC) N<sub>2</sub> atmosphere glovebox. High-Resolution Mass Spectrometry (HRMS) data were obtained in the UCI Mass Spectrometry Facility using a Waters LCT Premier equipped with a TOF detector on positive mode.

NMR measurements were taken using a 500 MHz Bruker DRX500 spectrometer with a BBO probe at 298.1 K (<sup>1</sup>H = 498.557 MHz) or a 600 MHz Bruker Avance 600 spectrometer with a CBBFO probe at 298.0 K (<sup>1</sup>H = 600.124 MHz; <sup>13</sup>C{<sup>1</sup>H} = 150.919 MHz; <sup>19</sup>F = 564.505 MHz). All <sup>1</sup>H and <sup>13</sup>C{<sup>1</sup>H} chemical shifts are reported in ppm relative to SiMe<sub>4</sub> using the chemical shift of the solvent as the standard (<sup>1</sup>H: DMSO-*d*<sub>6</sub> = 2.50 ppm, chloroform-*d* (CDCl<sub>3</sub>) = 7.26 ppm; <sup>13</sup>C{<sup>1</sup>H}: DMSO-*d*<sub>6</sub> = 39.52 ppm, CDCl<sub>3</sub> = 77.16 ppm). <sup>19</sup>F chemical shifts were referenced to 1-fluorobenzene (δ = -112.83 ppm in DMSO-*d*<sub>6</sub> relative to neat CFCl<sub>3</sub>) as the internal standard.<sup>1</sup> <sup>1</sup>H and <sup>13</sup>C{<sup>1</sup>H} data are reported as follows: chemical shift, (multiplicity (s = singlet, d = doublet, t = triplet, m = multiplet, br = broad), coupling constant(s), integration, assignment).

Titration experiments were performed with the 600 MHz Bruker Avance 600 spectrometer by obtaining a <sup>1</sup>H NMR spectra of the host complex (5 mM in DMSO-*d*<sub>6</sub>, 500 μL) with the desired equivalent amount of the tetrabutylammonium (TBA) salt (200 mM in DMSO-*d*<sub>6</sub>) added using a Hamilton microsyringe. Up to 20 mole equivalents (250 μL total volume) of TBACl, TBAH<sub>2</sub>PO<sub>4</sub>, or TBACH<sub>3</sub>COO were titrated over 8 <sup>1</sup>H NMR spectra or 12 mole equivalents (150 μL total volume) of TBAF•3H<sub>2</sub>O over 15 <sup>1</sup>H NMR spectra were measured.

To calculate the binding constant of F<sup>-</sup> in the slow exchange regime, **Eqn. 1** was used assuming that  $1 - [\text{Ni(II)}] = [\text{Ni(II)}\cdot\text{F}^-]$ , that the integration of the C(Ar)-H signal at 8.13 ppm of NiL<sup>3,3'-O</sup> is proportional to  $[\text{Ni(II)}] + [\text{Ni(II)}\cdot\text{F}^-]$ . <sup>1</sup>H NMR spectra were obtained with the relaxation delay time (d1) set to 10 s. [F<sup>-</sup>] was calculated from the integration of the terminal CH<sub>3</sub> signal of the tetrabutylammonium counterion.

$$K = \frac{[Ni(II) \cdot F^-]}{[Ni(II)][F^-]} = \frac{[Ni(II)]_0 \times \left(1 - \frac{I_{Na-H} + I_{Nb-H}}{I_{CH}}\right)}{\left([Ni(II)]_0 \times \left(\frac{I_{Na-H} + I_{Nb-H}}{I_{CH}}\right)\right) \times \left(\frac{I_{CH3}}{12} \times [Ni(II)]_0\right)}$$

**(Equation 1)**

Where  $I_{Na-H}$  = integration of the  $N_a-H$  peak,  $I_{Nb-H}$  = integration of the  $N_b-H$  peak,  $I_{CH}$  = integration of the CH peak at 8.13 ppm and  $I_{CH3}$  = integration of the  $CH_3$  peak of tetrabutylammonium at 0.93 ppm.

Diffusion Ordered Spectroscopy (DOSY) experiments were performed using a 600 MHz Bruker Avance 600 spectrometer at 298.0 K, measuring 8 scans over 16 spectra using the following parameters: gradient strength,  $gpz6 = 2-95\%$ ; relaxation delay time,  $d1 = 5.000$  s; diffusion time,  $d20 (\Delta) = 0.1000$  s; diffusion gradient length,  $p30 (\delta) = 1000 \mu s$ .

X-ray diffraction studies were performed at the UCI Department of Chemistry X-ray Crystallography Facility using a Bruker SMART APEX II (Mo  $K\alpha$ ,  $\lambda = 0.71073 \text{ \AA}$ ) or a Bruker X8 Prospector APEX III (Cu  $K\alpha$ ,  $\lambda = 1.54178 \text{ \AA}$ ) x-ray diffractometer. ORTEP representations were generated through ORTEP-3.<sup>2</sup> Bond metrics were measured from the CIF file through Olex2.<sup>3</sup>

### Synthetic Procedures

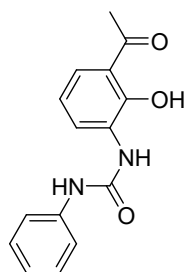

**Synthesis of  $HL^{3-O}$ .** To a round bottom flask equipped with a stir bar, 1-(3-amino-2-hydroxyphenyl)ethanone (1.512 g, 10.0 mmol) was dissolved in dichloromethane (DCM) (20.0 mL) forming a brownish black solution. Phenyl isocyanate (1.09 mL, 10.0 mmol) was added dropwise *via* syringe, and the reaction was stirred vigorously. Precipitation of the product occurred gradually throughout the reaction. After 2 hours, the reaction was quenched with deionized water and the crude

product was collected *via* vacuum filtration and triturated in DCM. The final product was collected once more *via* vacuum filtration as an off-white powder. Yield = 68% (1.836 g, 6.8 mmol).  **$^1H$  NMR (DMSO- $d_6$ ):**  $\delta$  12.87 (s, 1H, Ar-OH), 9.41 (s, 1H, Ar-NH), 8.39 (m, 2H, Ar-H and Ar-NH), 7.57 (d,  $J = 7.9$  Hz, 1H, Ar-H), 7.46 (d,  $J = 7.7$  Hz, 2H, Ar-H), 7.29 (t,  $J = 6.7$  Hz, 2H, Ar-H), 6.96 (dd,  $J = 19.3, 8.2$  Hz, 2H Ar-H), 2.67 (s, 3H, Ar-C(=O)).  **$^{13}C$  NMR (DMSO- $d_6$ ):**  $\delta$  206.0 (s, Ar-C=O), 152.4 (s, Ar-OH), 150.3 (s, HN-C(=O)-NH), 139.6 (s, Ar-NH), 128.8 (s, Ar-NH), 128.7 (s, Ar), 124.3 (s, Ar), 123.6 (s, Ar), 121.9 (s, Ar), 118.8 (s, Ar), 118.7 (s, Ar), 118.0 (s, Ar), 26.9 (s, ArC- $CH_3$ ). **HRMS (ESI-MS):** calculated  $C_{15}H_{14}N_2O_3Na^+ = 293.0902$   $m/z$ , found 293.0915  $m/z$ .

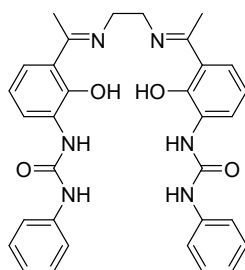

**Synthesis of  $H_2L^{3,3'-O}$ .** To a round bottom flask equipped with a stir bar, addition funnel, and a reflux condenser,  $HL^{3-O}$  (0.511 g, 3.0 mmol) was heated

to reflux in methanol (MeOH) (60.0 mL), appearing as a murky brown solution. Ethylenediamine (0.10 mL, 1.5 mmol) was dissolved in MeOH (90.0 mL) in a beaker, then poured into the addition funnel. The ethylenediamine solution was added dropwise into the refluxing solution of **HL**<sup>3-0</sup> for over 1 hour, at which point the solution turned dark orange. The flask was taken off heat after 2 hours and allowed to stand overnight at room temperature. The product was collected as a yellow orange powder *via* vacuum filtration and washed with MeOH. The mother liquor was concentrated under vacuum and stored in a -5 °C freezer overnight to collect the second crop of product. Yield = 89% (0.750 g, 1.3 mmol). **<sup>1</sup>H NMR (DMSO-*d*<sub>6</sub>)**: δ 9.38 (s, 2H, Ar-NH), 8.42 (s, 2H, Ar-NH), 8.14 (d, *J* = 7.7 Hz, 2H, Ar-H), 7.41 (d, *J* = 7.7 Hz, 4H, Ar-H), 7.27 (d, *J* = 8.4 Hz, 2H, Ar-H), 7.23 (t, *J* = 7.3 Hz, 4H, Ar-H), 6.92 (t, *J* = 7.3 Hz, 2H, Ar-H), 6.58 (t, *J* = 8.0 Hz, 2H, Ar-H), 4.06 (s, 4H, N(CH<sub>3</sub>)<sub>2</sub>N), 2.53 (s, 6H, Ar-C(=N)CH<sub>3</sub>). **<sup>13</sup>C NMR (DMSO-*d*<sub>6</sub>)**: δ 175.3 (s, Ar-C(=N)), 158.9 (s, Ar-OH), 152.5 (s, HN-C(=O)-NH), 140.0 (s, Ar-NH), 130.7 (s, Ar-NH), 128.7 (s, Ar), 121.5 (s, Ar), 121.0 (s, Ar), 119.4 (s, Ar), 117.8 (s, Ar), 115.1 (s, Ar), 114.2 (s, Ar), 46.7 (s, N(CH<sub>3</sub>)<sub>2</sub>N), 14.8 (s, ArC-CH<sub>3</sub>). **HRMS (ESI-MS)**: calculated C<sub>32</sub>H<sub>32</sub>N<sub>6</sub>O<sub>4</sub>H<sup>+</sup> = 565.2563 *m/z*, found 565.2549 *m/z*.

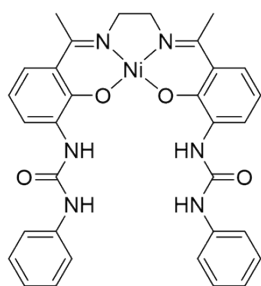

**Synthesis of NiL**<sup>3,3'-0</sup>. To a round bottom flask equipped with a stir bar and reflux condenser, **H<sub>2</sub>L**<sup>3,3'-0</sup> (0.392 g, 0.695 mmol) was heated to reflux in MeOH (15.0 mL). Ni(CH<sub>3</sub>COO)<sub>2</sub>•4H<sub>2</sub>O (0.173 g, 0.695 mmol) was quickly added to the refluxing solution, and a gradual color change to orange brown was observed. The solution was allowed to reflux for 1 hour, then cooled to room temperature. The product was collected as an orange powder *via*

vacuum filtration. Yield = 95% (0.408 g, 0.66 mmol). **<sup>1</sup>H NMR (DMSO-*d*<sub>6</sub>)**: δ 9.03 (s, 2H, Ar-NH), 8.37 (s, 2H, Ar-NH), 8.13 (dd, *J* = 7.8, 1.5 Hz, 2H, Ar-H), 7.27 (d, *J* = 7.5 Hz, 4H, Ar-H), 7.21 (dd, *J* = 8.5, 1.5 Hz, 2H, Ar-H), 7.03 (t, *J* = 8.0 Hz, 4H, Ar-H), 6.87 (t, *J* = 7.3 Hz, 2H, Ar-H), 6.52 (t, *J* = 8.0 Hz, 2H, Ar-H), 3.49 (s, 4H, N(CH<sub>3</sub>)<sub>2</sub>N), 2.43 (s, 6H, Ar-C(=N)CH<sub>3</sub>). **<sup>13</sup>C NMR (DMSO-*d*<sub>6</sub>)**: δ 169.6 (s, Ar-C(=N)), 152.7 (s, Ar-O), 152.4 (s, HN-C(=O)-NH), 139.3 (s, Ar-NH), 131.0 (s, Ar-NH), 128.4 (s, Ar), 121.8 (s, Ar), 121.7 (s, Ar), 121.0 (s, Ar), 118.9 (s, Ar), 118.3 (s, Ar), 114.1 (s, Ar), 54.1 (s, N(CH<sub>3</sub>)<sub>2</sub>N), 18.4 (s, ArC-CH<sub>3</sub>). **HRMS (ESI-MS)**: calculated

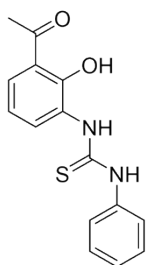

NiC<sub>32</sub>H<sub>30</sub>N<sub>6</sub>O<sub>4</sub>H<sup>+</sup> = 621.1760 *m/z*, found 621.1758 *m/z*.

**Synthesis of HL**<sup>3-5</sup>. To a round bottom flask equipped with a stir bar, 1-(3-amino-2-hydroxyphenyl)ethanone (0.605 g, 4.0 mmol) was dissolved in MeOH (20.0 mL), forming a dark brown solution. Phenyl isothiocyanate (0.50 mL, 4.2 mmol) was added dropwise *via* syringe, and the reaction was stirred vigorously. After 6 hours, the

reaction was quenched with deionized water, then extracted thrice with DCM and dried over anhydrous magnesium sulfate. The filtrate was obtained *via* vacuum filtration and dried under vacuum. The crude product was triturated in MeOH, and the final product was obtained as a brown powder *via* vacuum filtration. Yield = 73% (0.837 g, 2.9 mmol). **<sup>1</sup>H NMR (DMSO-*d*<sub>6</sub>)**: δ 12.71 (s,

<sup>1</sup>H, Ar–OH), 10.08 (s, 1H, Ar–NH), 9.24 (m, 2H, Ar–H and Ar–NH), 8.20 (d, *J* = 8.1 Hz, 1H, Ar–H), 7.79 (d, *J* = 8.1 Hz, 1H, Ar–H), 7.54 (d, *J* = 8.0 Hz, 2H, Ar–H), 7.35 (t, *J* = 7.6 Hz, 2H, Ar–H), 7.15 Hz (t, *J* = 7.3 Hz, 1H, Ar–H), 6.98 (t, *J* = 7.8 Hz, 1H, Ar–H), 2.68 (s, 3H, Ar–C(=O)CH<sub>3</sub>). **<sup>13</sup>C NMR (DMSO-*d*<sub>6</sub>)**: δ 205.8 (s, Ar–C=O), 179.6 (s, HN–C(=S)–NH), 154.6 (s, Ar–OH), 139.2 (s, Ar–NH), 132.6 (s, Ar–NH), 128.5 (s, Ar), 128.0 (s, Ar), 127.8 (s, Ar), 124.7 (s, Ar), 123.7 (s, Ar), 119.7 (s, Ar), 118.0 (s, Ar), 27.1 (s, ArC–CH<sub>3</sub>). **HRMS (ESI-MS)**: calculated C<sub>15</sub>H<sub>14</sub>N<sub>2</sub>O<sub>2</sub>SNa<sup>+</sup> = 309.0674 *m/z*, found 309.0672 *m/z*.

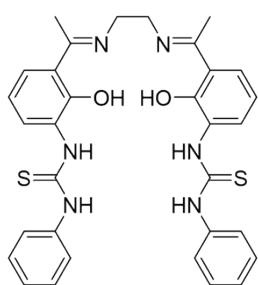

**Synthesis of *H<sub>2</sub>L*<sup>3,3'-S</sup>**. To a round bottom flask equipped with a stir bar, addition funnel, and a reflux condenser, **HL**<sup>3-S</sup> (0.286 g, 1.0 mmol) was heated to reflux in methanol (MeOH) (20.0 mL), appearing as a clear yellow solution. Ethylenediamine (0.030 g, 0.5 mmol) was dissolved in MeOH (30.0 mL) in a beaker, then poured into the addition funnel. The ethylenediamine solution was added dropwise into the refluxing solution of **HL**<sup>3-S</sup> for over 1

hour, at which point the solution turned dark orange. The flask was taken off heat after 2 hours and allowed to stand overnight at room temperature. The product was collected as a yellow orange powder *via* vacuum filtration and washed with MeOH. The mother liquor was concentrated under vacuum and stored in a –5 °C freezer overnight to collect the second crop of product. Yield = 72% (0.215 g, 0.36 mmol). **<sup>1</sup>H NMR (DMSO-*d*<sub>6</sub>)**: δ 10.27 (s, 2H, Ar–NH), 9.40 (s, 2H, Ar–NH), 8.57 (d, *J* = 7.2 Hz, 2H, Ar–H), 7.48 (d, *J* = 8.1 Hz, 4H, Ar–H), 7.40 (d, *J* = 8.5 Hz, 2H, Ar–H), 7.31 (t, *J* = 7.8 Hz, 4H, Ar–H), 7.12 (t, *J* = 7.2 Hz, 2H, Ar–H), 6.57 (t, *J* = 8.1 Hz, 2H, Ar–H), 4.06 (s, 4H, N(CH<sub>3</sub>)<sub>2</sub>N), 2.53 (s, 6H, Ar–C(=N)CH<sub>3</sub>). **<sup>13</sup>C NMR (DMSO-*d*<sub>6</sub>)**: δ 177.8 (s, HN–C(=S)–NH), 175.7 (s, Ar–C(=N)), 162.1 (s, Ar–OH), 139.0 (s, Ar–NH), 130.3 (s, Ar–NH), 128.6 (s, Ar), 124.6 (s, Ar), 124.5 (s, Ar), 124.2 (s, Ar), 123.6 (s, Ar), 115.3 (s, Ar), 112.9 (s, Ar), 46.3 (s, N(CH<sub>3</sub>)<sub>2</sub>N), 14.8 (s, ArC–CH<sub>3</sub>). **HRMS (ESI-MS)**: calculated C<sub>32</sub>H<sub>32</sub>N<sub>6</sub>O<sub>2</sub>S<sub>2</sub>Na<sup>+</sup> = 619.1926 *m/z*, found 619.1920 *m/z*.

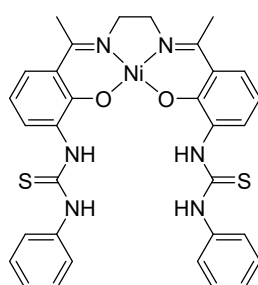

**Synthesis of *NiL*<sup>3,3'-S</sup>**. To a round bottom flask equipped with a stir bar and reflux condenser, **H<sub>2</sub>L**<sup>3,3'-S</sup> (0.060 g, 0.10 mmol) was heated to reflux in MeCN (5 mL). Ni(CH<sub>3</sub>COO)<sub>2</sub>•4H<sub>2</sub>O (0.025 g, 0.10 mmol) was quickly added to the refluxing solution, and a gradual color change to orange brown was observed. The solution was allowed to reflux for 2 hours, then cooled to room temperature. The product was collected as shiny orange crystals powder *via*

*vacuum filtration*. Yield = 75% (0.049 g, 0.75 mmol). **<sup>1</sup>H NMR (DMSO-*d*<sub>6</sub>)**: δ 9.74 (s, 2H, Ar–NH), 9.24 (s, 2H, Ar–NH), 8.33 (d, *J* = 7.0 Hz, 2H, Ar–H), 7.37 (d, *J* = 8.4 Hz, 2H, Ar–H), 7.26 (d, *J* = 7.9 Hz, 4H, Ar–H), 7.10 (t, *J* = 7.5 Hz, 4H, Ar–H), 6.99 (t, *J* = 6.8 Hz, 2H, Ar–H), 6.54 (t, *J* = 7.9 Hz, 2H, Ar–H), 3.49 (s, 4H, N(CH<sub>3</sub>)<sub>2</sub>N), 2.44 (s, 6H, Ar–C(=N)CH<sub>3</sub>). **<sup>13</sup>C NMR (DMSO-*d*<sub>6</sub>)**: δ 178.4 (s, HN–C(=S)–NH), 169.5 (s, Ar–C(=N)), 154.3 (s, Ar–O), 139.0 (s, Ar–NH), 130.0 (s, Ar–NH), 127.9 (s, Ar), 124.9 (s, Ar), 124.7 (s, Ar), 124.4 (s, Ar), 123.8 (s, Ar), 121.5 (s, Ar), 113.2 (s, Ar), 54.5 (s,

$\text{N}(\text{CH}_3)_2$ , 18.5 (s, ArC-CH<sub>3</sub>). **HRMS (ESI-MS):** calculated  $\text{NiC}_{32}\text{H}_{30}\text{N}_6\text{O}_2\text{S}_2\text{Na}^+ = 675.1123 m/z$ , found 675.1143  $m/z$ .

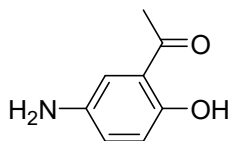

**Synthesis of 5-NH<sub>2</sub>.** The synthesis was adapted from a previously reported procedure.<sup>4</sup> 1-(2-hydroxy-5-nitrophenyl)ethanone (0.906 g, 5.0 mmol), 10 wt.% Pd/C (0.025 g), and anhydrous tetrahydrofuran (THF) (25.0 mL) was added to an oven-dried Schlenk flask equipped with a stir bar and a septum cap. The Schlenk flask was opened to vacuum and N<sub>2</sub> intermittently, then the stopcock was closed before an H<sub>2</sub> balloon equipped with an 18G needle was inserted into the septum cap. The solution was stirred under H<sub>2</sub> atmosphere at room temperature for 1 day. The solution was filtered through celite, then filtered again through a 0.45 μm PTFE syringe filter before drying under vacuum. The product was collected as yellow solids. *Note: the product decomposes over time under ambient conditions, and therefore must be made fresh before using in the next step.* Yield = 94% (0.710 g, 4.7 mmol). **<sup>1</sup>H NMR (CDCl<sub>3</sub>):** δ 11.71 (s, 1H, Ar-OH), 7.03 (d, *J* = 2.8 Hz, 1H, Ar-H), 6.91 (dd, *J* = 8.8, 2.8 Hz, 1H, Ar-H), 6.83 (d, *J* = 8.8 Hz, 1H, Ar-H), 3.46 (s, 2H, Ar-NH<sub>2</sub>), 2.58 (s, 3H, Ar-C(=O)CH<sub>3</sub>). **<sup>13</sup>C NMR (CDCl<sub>3</sub>):** δ 204.3 (s, Ar-C=O), 155.6 (s, Ar-OH), 138.2 (s, Ar-NH<sub>2</sub>), 125.4 (s, Ar), 119.5 (s, Ar), 119.0 (s, Ar), 115.4 (s, Ar), 26.8 (s, Ar-CH<sub>3</sub>). **HRMS (ESI-MS):** calculated C<sub>8</sub>H<sub>9</sub>NO<sub>2</sub>H<sup>+</sup> = 152.0712  $m/z$ , found 152.0714  $m/z$ .

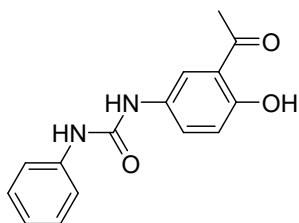

**Synthesis of HL<sup>5-0</sup>.** To a round bottom flask equipped with a stir bar, 5-NH<sub>2</sub> (0.30 g, 2.0 mmol) was dissolved in DCM (10 mL), forming a golden yellow solution. Phenyl isothiocyanate (0.50 mL, 4.2 mmol) was added dropwise *via* syringe, and the reaction was stirred vigorously.

Precipitation of the product occurred gradually throughout the reaction. After 1.5 hours, the product was obtained *via* vacuum filtration as a beige powder. Yield = 84% (0.451 g, 1.7 mmol). **<sup>1</sup>H NMR (DMSO-*d*<sub>6</sub>):** δ 11.54 (s, 1H, Ar-OH), 8.64 (s, 1H, Ar-NH<sub>2</sub>), 8.58 (s, 1H, Ar-NH<sub>2</sub>), 7.97 (d, *J* = 2.7 Hz, 1H, Ar-H), 7.53 (dd, *J* = 8.9, 2.7 Hz, 1H, Ar-H), 7.45 (dd, *J* = 8.6, 1.1 Hz, 2H, Ar-H), 7.30 – 7.23 (m, 2H, Ar-H), 6.96 (tt, *J* = 7.4, 1.1 Hz, 1H, Ar-H), 6.92 (d, *J* = 8.9 Hz, 1H, Ar-H), 2.62 (s, 3H, Ar-C(=O)CH<sub>3</sub>). **<sup>13</sup>C NMR (DMSO-*d*<sub>6</sub>):** δ 203.8 (s, Ar-C=O), 155.9 (s, Ar-OH), 152.9 (s, HN-C(=O)-NH), 139.7 (s, Ar-NH), 131.3 (s, Ar-NH), 128.7 (s, Ar), 127.9 (s, Ar), 121.8 (s, Ar), 120.5 (s, Ar), 120.1 (s, Ar), 118.3 (s, Ar), 117.7 (s, Ar), 27.8 (s, Ar-CH<sub>3</sub>). **HRMS (ESI-MS):** calculated C<sub>15</sub>H<sub>14</sub>N<sub>2</sub>O<sub>3</sub>Na<sup>+</sup> = 293.0902  $m/z$ , found 293.0914  $m/z$ .

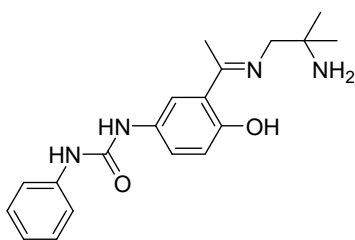

**Synthesis of HL<sup>5-0</sup>NH<sub>2</sub>.** To a round bottom flask equipped with a stir bar, addition funnel, and a reflux condenser, HL<sup>5-0</sup> (0.135 g, 0.50 mmol) was heated to reflux in MeOH (10.0 mL), appearing as a clear yellow solution. 2-methylpropane-1,2-diamine (0.2645 g, 1.5 mmol) was dissolved in MeOH (10.0 mL) in a scintillation vial, then poured

into the addition funnel. The diamine solution was added dropwise into the refluxing solution of **HL**<sup>5-0</sup> for over 30 minutes, which maintained a clear yellow color. The reaction was taken off the heat after 3 hours. The product was collected as a golden yellow oil. Excess diamine was removed by heating the scintillation vial of the product to 55 °C for 3 hours under vacuum. The crude product was obtained as yellow-orange solids without further purification. Yield = 82% by <sup>1</sup>H NMR. **<sup>1</sup>H NMR (DMSO-*d*<sub>6</sub>)**: δ 8.83 (s, 1H, Ar–NH), 8.65 (s, 1H, Ar–NH), 7.79 (d, *J* = 2.5 Hz, 1H, Ar–H), 7.45 (d, *J* = 7.7 Hz, 2H, Ar–H), 7.29 (dd, *J* = 8.8, 2.5 Hz, 1H, Ar–H), 7.25 (t, *J* = 8.0 Hz, 2H, Ar–H), 6.93 (t, *J* = 7.3 Hz, 1H, Ar–H), 6.73 (d, *J* = 8.8 Hz, 1H, Ar–H), 3.41 (s, 2H, N–CH<sub>2</sub>), 2.33 (s, 3H, Ar–C(=N)CH<sub>3</sub>), 1.11 (s, 6H, N–C(CH<sub>3</sub>)<sub>2</sub>). **<sup>13</sup>C NMR (DMSO-*d*<sub>6</sub>)**: δ 171.9 (s, Ar–C(=N)), 159.2 (s, Ar–OH), 153.0 (s, HN–C(=O)–NH) 140.0 (s, Ar–NH), 129.0 (s, Ar–NH), 128.7 (s, Ar), 124.7 (s, Ar), 121.5 (s, Ar), 119.1 (s, Ar), 118.4 (s, Ar), 118.1 (s, Ar), 117.9 (s, Ar), 61.7 (s, N–CH<sub>2</sub>), 50.0 (s, H<sub>2</sub>N–C(CH<sub>3</sub>)<sub>2</sub>), 28.4 (s, NC–(CH<sub>3</sub>)<sub>2</sub>), 14.5 (s, ArC–CH<sub>3</sub>). **HRMS (ESI-MS)**: calculated C<sub>19</sub>H<sub>24</sub>N<sub>4</sub>O<sub>2</sub>H<sup>+</sup> 341.1978 *m/z*, found 341.1965 *m/z*.

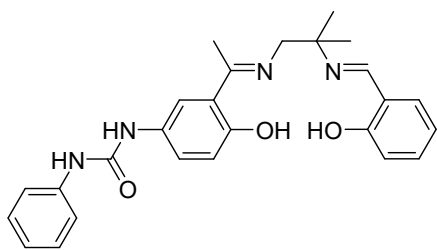

*Synthesis of H<sub>2</sub>L<sup>5-0</sup>*. To a round bottom flask equipped with a stir bar, addition funnel, and a reflux condenser, **HL**<sup>5-0</sup>NH<sub>2</sub> (0.212 g, 82% purity, 0.51 mmol) was heated to reflux in MeOH (10.0 mL), appearing as a clear yellow solution. Salicylaldehyde (0.075 g, 0.61 mmol) was dissolved in MeOH (10.0 mL) in a scintillation vial, then poured into the addition

funnel. The salicylaldehyde solution was added dropwise into the refluxing solution of **HL**<sup>5-0</sup>NH<sub>2</sub> over 30 minutes. The solution was allowed to reflux for 2 hours before cooling to room temperature. The solution was dried under vacuum, then redissolved in minimal MeOH. Sonication of the solution for 2 minutes precipitated a yellow powder that was obtained upon filtration. Yield = 65%. **<sup>1</sup>H NMR (DMSO-*d*<sub>6</sub>)**: δ 13.92 (s, 1H, Ar–C(=N)H), 8.62 (s, 1H, Ar–NH), 8.58 (s, 1H, Ar–NH), 8.40 (s, 1H, Ar–OH), 7.78 (d, *J* = 2.3 Hz, 1H, Ar–H), 7.49 (dd, *J* = 7.7, 1.5 Hz, 1H, Ar–H), 7.43 (d, *J* = 7.9 Hz, 2H, Ar–H), 7.31 (t, *J* = 8.0 Hz, 1H, Ar–H), 7.28 – 7.23 (m, 3H, Ar–H), 6.94 (t, *J* = 7.4 Hz, 1H, Ar–H), 6.88 (t, *J* = 7.6 Hz, 1H, Ar–H), 6.83 (d, *J* = 8.6 Hz, 1H, Ar–H), 6.72 (d, *J* = 8.8 Hz, 1H, Ar–H), 3.75 (s, 2H, N–CH<sub>2</sub>), 2.34 (s, 3H, Ar–C(=N)CH<sub>3</sub>), 1.40 (s, 6H, NC(CH<sub>3</sub>)<sub>2</sub>). **<sup>13</sup>C NMR (DMSO-*d*<sub>6</sub>)**: δ 172.4 (s, Ar–C(=N)), 162.6 (s, Ar–C(=N)), 160.9 (s, Ar–OH), 158.1 (s, Ar–OH), 153.0 (s, HN–C(=O)–NH), 139.9 (s, Ar–NH), 132.2 (s, Ar–NH), 132.0 (s, Ar), 129.5 (s, Ar), 128.7 (s, Ar), 124.4 (s, Ar), 121.6 (s, Ar), 119.0 (s, Ar), 118.7 (s, Ar), 118.7 (s, Ar), 118.3 (s, Ar), 118.14 (s, Ar), 117.6 (s, Ar), 116.5 (s, Ar), 60.2 (s, N–C(CH<sub>3</sub>)<sub>2</sub>), 59.9 (s, N–CH<sub>2</sub>), 25.2 (s, NC–(CH<sub>3</sub>)<sub>2</sub>), 14.8 (s, ArC–CH<sub>3</sub>). **HRMS (ESI-MS)**: calculated C<sub>26</sub>H<sub>28</sub>N<sub>4</sub>O<sub>3</sub>H<sup>+</sup> = 445.2240 *m/z*, found 445.2252 *m/z*.

*Synthesis of NiL<sup>5-0</sup>*. To a round bottom flask equipped with a stir bar and reflux condenser, **H<sub>2</sub>L<sup>5-0</sup>** (0.089 g, 0.20 mmol) was heated to reflux in MeCN (5.0 mL). Ni(CH<sub>3</sub>COO)<sub>2</sub>•4H<sub>2</sub>O (0.055 g, 0.22 mmol) was dissolved in MeCN (5.0 mL) in a scintillation vial under sonication before it was added to the refluxing solution. A gradual color change from bright yellow to dark orange was observed. The solution was allowed to reflux for 1 hour, then cooled to room temperature before storing in a -5 °C freezer overnight. The solution was sonicated to precipitate the product. The crude product was obtained by vacuum filtration, then redissolved in minimal MeOH before adding excess Et<sub>2</sub>O. The precipitate was obtained by vacuum filtration as tan-brown flakes. Yield = 53% (0.054 g, 0.11 mmol). **<sup>1</sup>H NMR (DMSO-*d*<sub>6</sub>)**: 8.55 (s, 1H, Ar-NH), 8.22 (s, 1H, Ar-NH), 7.78 (s, 1H, Ar-H), 7.68 (d, *J* = 3.2 Hz, 1H, Ar-H), 7.43 (d, *J* = 8.0 Hz, 2H, Ar-H), 7.35 (dd, *J* = 7.8, 2.0 Hz, 1H, Ar-H), 7.25 (t, *J* = 7.9 Hz, 2H, Ar-H), 7.15 (ddd, *J* = 9.0, 7.0, 1.8 Hz, 1H, Ar-H), 7.10 (dd, *J* = 8.7, 2.8 Hz, 1H, Ar-H), 6.93 (t, *J* = 7.3 Hz, 1H, Ar-H), 6.67 (d, *J* = 8.7, Hz, 1H, Ar-H), 6.66 (d, *J* = 8.4, Hz, 1H, Ar-H), 6.50 (t, *J* = 7.4 Hz, 1H, Ar-H), 3.37 (s, 2H\*, N-CH<sub>2</sub>), 2.37 (s, 3H, Ar-C(=N)CH<sub>3</sub>), 1.43 (s, 6H, NC(CH<sub>3</sub>)<sub>2</sub>). \*Partially overlaps with residual H<sub>2</sub>O peak. **<sup>13</sup>C NMR (DMSO-*d*<sub>6</sub>)**: δ 168.7 (s, Ar-C(=N)), 163.4 (s, Ar-C(=N)), 160.1 (s, Ar-O), 159.0 (s, Ar-O), 153.1 (s, HN-C(=O)-NH), 140.1 (s, Ar-NH), 133.5 (s, Ar-NH), 133.2 (s, Ar), 128.7 (s, Ar), 126.4 (s, Ar), 126.2 (s, Ar), 121.4 (s, Ar), 120.9 (s, Ar), 120.5 (s, Ar), 120.5 (s, Ar), 119.6 (s, Ar), 119.5 (s, Ar), 118.0 (s, Ar), 114.0 (s, Ar), 66.3 (s, N-C(CH<sub>3</sub>)<sub>2</sub>), 65.5 (s, N-CH<sub>2</sub>), 25.6 (s, NC-(CH<sub>3</sub>)<sub>2</sub>), 18.3 (s, ArC-CH<sub>3</sub>). **HRMS (ESI-MS)**: calculated NiC<sub>26</sub>H<sub>26</sub>N<sub>4</sub>O<sub>3</sub>Na<sup>+</sup> = 523.1256 *m/z*, found 523.1268 *m/z*.

## Crystallographic Information

### X-ray Data Collection, Structure Solution and Refinement for NiL<sup>3,3'-O</sup>•DMSO-*d*<sub>6</sub>.

An orange crystal of approximate dimensions 0.190 x 0.415 x 0.429 mm was mounted on a glass fiber and transferred to a Bruker SMART APEX II diffractometer system. The APEX2<sup>5</sup> program package was used to determine the unit-cell parameters and for data collection (20 sec/frame scan time). The raw frame data was processed using SAINT<sup>6</sup> and SADABS<sup>7</sup> to yield the reflection data file.

Subsequent calculations were carried out using the SHELXTL<sup>8</sup> program package. The diffraction symmetry was *2/m* and the systematic absences were consistent with the monoclinic space group

*P2<sub>1</sub>/n* that was later determined to be correct.

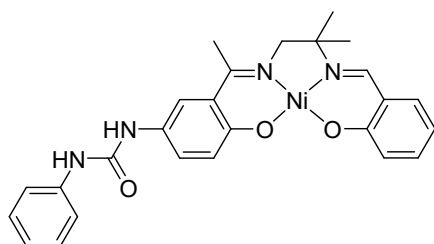

The structure was solved by direct methods and refined on F<sup>2</sup> by full-matrix least-squares techniques. The analytical scattering factors<sup>9</sup> for neutral atoms were used throughout the analysis. Hydrogen atoms were either located from a difference-Fourier map and refined (*x,y,z* and *U*<sub>iso</sub>) or were

included using a riding model. There was one molecule of dimethyl sulfoxide-*d*<sub>6</sub> solvent present.



Least-squares analysis yielded  $wR2 = 0.0701$  and  $Goof = 1.034$  for 466 variables refined against 10013 data (0.68 Å),  $R1 = 0.0248$  for those 9302 data with  $I > 2.0\sigma(I)$ .

#### **X-ray Data Collection, Structure Solution and Refinement for $NiL^{3,3'-O} \cdot (H_2O)_2(THF)_2$ .**

A yellow crystal of approximate dimensions 0.119 x 0.121 x 0.286 mm was mounted in a cryoloop and transferred to a Bruker SMART APEX II diffractometer system. The APEX2<sup>5</sup> program package was used to determine the unit-cell parameters and for data collection (120 sec/frame scan time). The raw frame data was processed using SAINT<sup>6</sup> and SADABS<sup>7</sup> to yield the reflection data file.

Subsequent calculations were carried out using the SHELXTL<sup>8</sup> program package. The diffraction symmetry was  $2/m$  and the systematic absences were consistent with the monoclinic space group  $P2_1/n$  that was later determined to be correct.

The structure was solved by direct methods and refined on  $F^2$  by full-matrix least-squares techniques. The analytical scattering factors<sup>9</sup> for neutral atoms were used throughout the analysis. Hydrogen atoms were either located from a difference-Fourier map and refined ( $x,y,z$  and  $U_{iso}$ ) or were included using a riding model. There were two molecules of tetrahydrofuran solvent and two water molecules present.

Least-squares analysis yielded  $wR2 = 0.1154$  and  $Goof = 1.054$  for 526 variables refined against 9623 data (0.75 Å),  $R1 = 0.0488$  for those 7289 data with  $I > 2.0\sigma(I)$ .

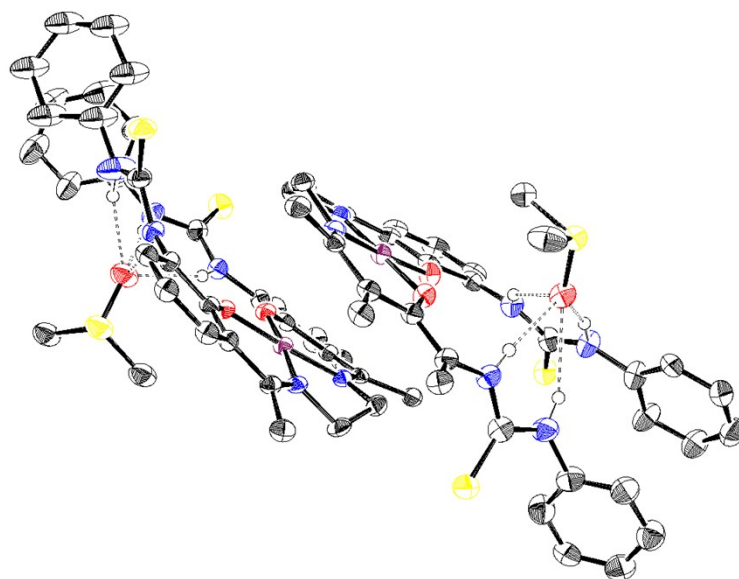

**Figure S1.** Solid-state structure of the full asymmetric unit of  $\text{NiL}^{3,3'-\text{S}}\cdot\text{DMSO}$ . Hydrogen atoms that do not participate in hydrogen bonding have been omitted for clarity. Thermal ellipsoids are represented at 50% probability. Ellipsoids are labeled as follows: maroon = Ni, black = C, red = O, blue = N, yellow = S. Hydrogen atoms are represented as black spheres.

#### **X-ray Data Collection, Structure Solution and Refinement for $\text{NiL}^{3,3'-\text{S}}\cdot\text{DMSO}$ .**

An orange crystal of approximate dimensions 0.088 x 0.323 x 0.431 mm was mounted in a cryoloop and transferred to a Bruker X8 Prospector diffractometer system. The APEX3<sup>10</sup> program package was used to determine the unit-cell parameters and for data collection (10 sec/frame scan time). The raw frame data was processed using SAINT<sup>6</sup> and SADABS<sup>7</sup> to yield the reflection data file. Subsequent calculations were carried out using the SHELXTL<sup>8</sup> program package. There were no systematic absences. The centrosymmetric triclinic space group  $P\bar{1}$  was assigned and later determined to be correct.

The structure was solved by direct methods and refined on  $F^2$  by full-matrix least-squares techniques<sup>4</sup>. The analytical scattering factors<sup>9</sup> for neutral atoms were used throughout the analysis. Hydrogen atoms were included using a riding model. There are two symmetry unique Ni molecules in the asymmetric unit, and each Ni complex participates in hydrogen bonding interactions with a DMSO molecule. There were several high residuals present in the final difference-Fourier map. It was not possible to determine the nature of the residuals although it was probable that DMSO solvent was present. The SQUEEZE<sup>11</sup> routine in the PLATON<sup>12</sup> program package was used to account for the electrons in the solvent accessible voids. Disordered atoms were included using multiple components, partial-site occupancies, and geometric (SADI), and displacement (SIMU, ISOR, EADP) constraints.

Least-squares analysis yielded  $wR2 = 0.2016$  and  $Goof = 1.024$  for 855 variables refined against 13642 data ( $0.81 \text{ \AA}$ ),  $R1 = 0.0742$  for those 10805 data with  $I > 2.0\sigma(I)$ .

#### **X-ray Data Collection, Structure Solution and Refinement for NiL<sup>5-0</sup>.**

An orange crystal of approximate dimensions  $0.171 \times 0.171 \times 0.367 \text{ mm}$  was mounted on a glass fiber and transferred to a Bruker SMART APEX II diffractometer system. The APEX2<sup>5</sup> program package was used to determine the unit-cell parameters and for data collection (180 sec/frame scan time). The raw frame data was processed using SAINT<sup>6</sup> and SADABS<sup>7</sup> to yield the reflection data file. Subsequent calculations were carried out using the SHELXTL<sup>8</sup> program package. There were no systematic absences nor any diffraction symmetry other than the Friedel condition. The centrosymmetric triclinic space group  $P\bar{1}$  was assigned and later determined to be correct.

The structure was solved by direct methods and refined on  $F^2$  by full-matrix least-squares techniques. The analytical scattering factors<sup>9</sup> for neutral atoms were used throughout the analysis. Hydrogen atoms were located from a difference-Fourier map and refined ( $x,y,z$  and  $U_{iso}$ ). There are three symmetry unique Ni molecules locked in place through several hydrogen bonding interactions. Two carbon atoms were disordered and included multiple components, partial-site occupancies, geometric (SADI), and displacement (SIMU, EADP) constraints. There is also one molecule of ethanol and half a molecule of methanol present in the asymmetric unit.

Least-squares analysis yielded  $wR2 = 0.1397$  and  $Goof = 1.021$  for 983 variables refined against 20850 data ( $0.70 \text{ \AA}$ ),  $R1 = 0.0501$  for those 15415 data with  $I > 2.0\sigma(I)$ .

#### **X-ray Data Collection, Structure Solution and Refinement for [NiL<sup>3,3'-0</sup>]<sub>2</sub>•Cl.**

An orange crystal of approximate dimensions  $0.172 \times 0.236 \times 0.265 \text{ mm}$  was mounted in a cryoloop and transferred to a Bruker SMART APEX II diffractometer system. The APEX2<sup>5</sup> program package and the CELL\_NOW<sup>13</sup> were used to determine the unit-cell parameters. Data was collected using a 120 sec/frame scan time. The raw frame data was processed using SAINT<sup>6</sup> and TWINABS<sup>14</sup> to yield the reflection data file (HKL F5 format)<sup>14</sup>. Subsequent calculations were carried out using the SHELXTL<sup>8</sup> program package. There were no systematic absences nor any diffraction symmetry other than the Friedel condition. The centrosymmetric triclinic space group  $P\bar{1}$  was assigned and later determined to be correct.

The structure was solved by direct methods and refined on  $F^2$  by full-matrix least-squares techniques. The analytical scattering factors<sup>8</sup> for neutral atoms were used throughout the analysis. Hydrogen atoms H(3), H(4), H(5), H(6), H(9), H(10), H(11) and H(12) were located from a difference-Fourier map and refined ( $x,y,z$  and riding  $U_{iso}$ ). The remaining hydrogen atoms were included using a riding

model. There were three molecules of tetrahydrofuran solvent present. Disordered atoms were included using multiple components, partial site-occupancy-factors and restraint/constraints.

Least-squares analysis yielded  $wR2 = 0.1368$  and  $Goof = 1.063$  for 1132 variables refined against 17549 data (0.80 Å),  $R1 = 0.0519$  for those 15615 with  $I > 2.0\sigma(I)$ . The structure was refined as a two-component twin,  $BASF^8 = 0.3687$ .

Definitions:

$$wR2 = [\Sigma[w(F_o^2 - F_c^2)^2] / \Sigma[w(F_o^2)^2]]^{1/2}$$

$$R1 = \Sigma||F_o| - |F_c|| / \Sigma|F_o|$$

$Goof = S = [\Sigma[w(F_o^2 - F_c^2)^2] / (n-p)]^{1/2}$  where  $n$  is the number of reflections and  $p$  is the total number of parameters refined.

**Table S1.** Crystal data and structure refinement for  $\text{NiL}^{3,3'-\text{O}} \cdot \text{DMSO-d}_6$ .

|                                                 |                                                                                                                                  |
|-------------------------------------------------|----------------------------------------------------------------------------------------------------------------------------------|
| Deposition Number                               | 2379616                                                                                                                          |
| Empirical formula                               | $\text{C}_{32}\text{H}_{30}\text{N}_6\text{NiO}_4 \cdot \text{C}_2\text{D}_6\text{SO}$                                           |
| Formula weight                                  | 705.49                                                                                                                           |
| Temperature                                     | 93(2) K                                                                                                                          |
| Wavelength                                      | 0.71073 Å                                                                                                                        |
| Crystal system                                  | Monoclinic                                                                                                                       |
| Space group                                     | $P2_1/n$                                                                                                                         |
| Unit cell dimensions                            | $a = 18.2951(5)$ Å $\alpha = 90^\circ$<br>$b = 8.7660(3)$ Å $\beta = 91.9571(5)^\circ$<br>$c = 19.4810(6)$ Å $\gamma = 90^\circ$ |
| Volume                                          | $3122.44(17)$ Å <sup>3</sup>                                                                                                     |
| Z                                               | 4                                                                                                                                |
| Density (calculated)                            | 1.501 Mg/m <sup>3</sup>                                                                                                          |
| Absorption coefficient                          | 0.742 mm <sup>-1</sup>                                                                                                           |
| F(000)                                          | 1464                                                                                                                             |
| Crystal color                                   | orange                                                                                                                           |
| Crystal size                                    | 0.429 x 0.415 x 0.190 mm <sup>3</sup>                                                                                            |
| Theta range for data collection                 | 2.092 to 31.652°                                                                                                                 |
| Index ranges                                    | $-25 \leq h \leq 26$ , $-12 \leq k \leq 12$ , $-28 \leq l \leq 28$                                                               |
| Reflections collected                           | 80109                                                                                                                            |
| Independent reflections                         | 10013 [R(int) = 0.0216]                                                                                                          |
| Completeness to theta = 25.242°                 | 99.9 %                                                                                                                           |
| Absorption correction                           | Semi-empirical from equivalents                                                                                                  |
| Max. and min. transmission                      | 0.8623 and 0.8092                                                                                                                |
| Refinement method                               | Full-matrix least-squares on F <sup>2</sup>                                                                                      |
| Data / restraints / parameters                  | 10013 / 0 / 466                                                                                                                  |
| Goodness-of-fit on F <sup>2</sup>               | 1.034                                                                                                                            |
| Final R indices [ $I > 2\sigma(I)$ = 9302 data] | R1 = 0.0248, wR2 = 0.0687                                                                                                        |
| R indices (all data, 0.68 Å)                    | R1 = 0.0270, wR2 = 0.0701                                                                                                        |
| Largest diff. peak and hole                     | 0.485 and -0.329 e.Å <sup>-3</sup>                                                                                               |

**Table S2.** Crystal data and structure refinement for  $\text{NiL}^{3,3'-\text{O}} \cdot (\text{H}_2\text{O})_2(\text{THF})_2$ .

|                                                 |                                                                                                                                  |
|-------------------------------------------------|----------------------------------------------------------------------------------------------------------------------------------|
| Deposition Number                               | 2379617                                                                                                                          |
| Empirical formula                               | $\text{C}_{32}\text{H}_{30}\text{N}_6\text{NiO}_4 \cdot 2(\text{H}_2\text{O}) \cdot 2(\text{C}_4\text{H}_8\text{O})$             |
| Formula weight                                  | 801.57                                                                                                                           |
| Temperature                                     | 133(2) K                                                                                                                         |
| Wavelength                                      | 0.71073 Å                                                                                                                        |
| Crystal system                                  | Monoclinic                                                                                                                       |
| Space group                                     | $P2_1/n$                                                                                                                         |
| Unit cell dimensions                            | $a = 23.663(3)$ Å $\alpha = 90^\circ$<br>$b = 7.1548(8)$ Å $\beta = 113.9687(17)^\circ$<br>$c = 25.033(3)$ Å $\gamma = 90^\circ$ |
| Volume                                          | $3872.7(8)$ Å <sup>3</sup>                                                                                                       |
| Z                                               | 4                                                                                                                                |
| Density (calculated)                            | 1.375 Mg/m <sup>3</sup>                                                                                                          |
| Absorption coefficient                          | 0.562 mm <sup>-1</sup>                                                                                                           |
| F(000)                                          | 1696                                                                                                                             |
| Crystal color                                   | yellow                                                                                                                           |
| Crystal size                                    | 0.286 x 0.121 x 0.119 mm <sup>3</sup>                                                                                            |
| Theta range for data collection                 | 1.536 to 28.282°                                                                                                                 |
| Index ranges                                    | $-30 \leq h \leq 31, -9 \leq k \leq 9, -33 \leq l \leq 33$                                                                       |
| Reflections collected                           | 45957                                                                                                                            |
| Independent reflections                         | 9623 [R(int) = 0.0687]                                                                                                           |
| Completeness to theta = 25.242°                 | 99.9 %                                                                                                                           |
| Absorption correction                           | Semi-empirical from equivalents                                                                                                  |
| Max. and min. transmission                      | 0.8017 and 0.6246                                                                                                                |
| Refinement method                               | Full-matrix least-squares on F <sup>2</sup>                                                                                      |
| Data / restraints / parameters                  | 9623 / 6 / 526                                                                                                                   |
| Goodness-of-fit on F <sup>2</sup>               | 1.054                                                                                                                            |
| Final R indices [ $I > 2\sigma(I)$ = 7288 data] | R1 = 0.0488, wR2 = 0.1051                                                                                                        |
| R indices (all data, 0.75 Å)                    | R1 = 0.0727, wR2 = 0.1154                                                                                                        |
| Largest diff. peak and hole                     | 0.716 and -0.653 e.Å <sup>-3</sup>                                                                                               |

**Table S3.** Crystal data and structure refinement for  $\text{NiL}^{3,3'}\text{-S}\cdot\text{DMSO}$ .

|                                          |                                                                                                                      |
|------------------------------------------|----------------------------------------------------------------------------------------------------------------------|
| Deposition Number                        | 2379620                                                                                                              |
| Empirical formula                        | $\text{C}_{32}\text{H}_{30}\text{N}_6\text{NiO}_2\text{S}_2\cdot 1.6(\text{C}_2\text{H}_6\text{SO})$                 |
| Formula weight                           | 778.45                                                                                                               |
| Temperature                              | 93.15 K                                                                                                              |
| Wavelength                               | 1.54178 Å                                                                                                            |
| Crystal system                           | Triclinic                                                                                                            |
| Space group                              | P-1                                                                                                                  |
| Unit cell dimensions                     | a = 13.4469(4) Å      a = 79.477(2)°<br>b = 14.7117(5) Å      b = 86.598(2)°<br>c = 18.4767(7) Å      g = 88.997(2)° |
| Volume                                   | 3587.3(2) Å <sup>3</sup>                                                                                             |
| Z                                        | 4                                                                                                                    |
| Density (calculated)                     | 1.441 Mg/m <sup>3</sup>                                                                                              |
| Absorption coefficient                   | 3.119 mm <sup>-1</sup>                                                                                               |
| F(000)                                   | 1629                                                                                                                 |
| Crystal color                            | orange                                                                                                               |
| Crystal size                             | 0.431 x 0.323 x 0.088 mm <sup>3</sup>                                                                                |
| Theta range for data collection          | 2.436 to 72.674°                                                                                                     |
| Index ranges                             | -16 ≤ h ≤ 16, -18 ≤ k ≤ 17, -22 ≤ l ≤ 22                                                                             |
| Reflections collected                    | 94171                                                                                                                |
| Independent reflections                  | 3642 [R(int) = 0.0871]                                                                                               |
| Completeness to theta = 67.679°          | 96.4 %                                                                                                               |
| Absorption correction                    | Semi-empirical from equivalents                                                                                      |
| Max. and min. transmission               | 0.7536 and 0.5254                                                                                                    |
| Refinement method                        | Full-matrix least-squares on F <sup>2</sup>                                                                          |
| Data / restraints / parameters           | 13642 / 122 / 855                                                                                                    |
| Goodness-of-fit on F <sup>2</sup>        | 1.024                                                                                                                |
| Final R indices [I > 2σ(I) = 10805 data] | R1 = 0.0742, wR2 = 0.1888                                                                                            |
| R indices (all data, 0.81 Å)             | R1 = 0.0905, wR2 = 0.2016                                                                                            |
| Extinction coefficient                   | n/a                                                                                                                  |
| Largest diff. peak and hole              | 1.148 and -2.005 e.Å <sup>-3</sup>                                                                                   |

**Table S4.** Crystal data and structure refinement for NiL<sup>5-0</sup>.

|                                          |                                                                                                                               |
|------------------------------------------|-------------------------------------------------------------------------------------------------------------------------------|
| Deposition Number                        | 2379619                                                                                                                       |
| Empirical formula                        | C <sub>26.83</sub> H <sub>28</sub> N <sub>4</sub> NiO <sub>3.50</sub>                                                         |
| Formula weight                           | 521.24                                                                                                                        |
| Temperature                              | 93(2) K                                                                                                                       |
| Wavelength                               | 0.71073 Å                                                                                                                     |
| Crystal system                           | Triclinic                                                                                                                     |
| Space group                              | P-1                                                                                                                           |
| Unit cell dimensions                     | a = 11.6000(10) Å      α = 72.4119(14)°<br>b = 16.4750(15) Å      β = 88.1460(15)°<br>c = 21.5479(19) Å      γ = 71.8599(15)° |
| Volume                                   | 3721.7(6) Å <sup>3</sup>                                                                                                      |
| Z                                        | 6                                                                                                                             |
| Density (calculated)                     | 1.395 Mg/m <sup>3</sup>                                                                                                       |
| Absorption coefficient                   | 0.820 mm <sup>-1</sup>                                                                                                        |
| F(000)                                   | 1638                                                                                                                          |
| Crystal color                            | orange                                                                                                                        |
| Crystal size                             | 0.367 x 0.171 x 0.171 mm <sup>3</sup>                                                                                         |
| Theta range for data collection          | 1.922 to 29.574°                                                                                                              |
| Index ranges                             | -16 ≤ h ≤ 16, -22 ≤ k ≤ 22, -29 ≤ l ≤ 29                                                                                      |
| Reflections collected                    | 73631                                                                                                                         |
| Independent reflections                  | 20850 [R(int) = 0.0588]                                                                                                       |
| Completeness to theta = 25.242°          | 99.9 %                                                                                                                        |
| Absorption correction                    | Semi-empirical from equivalents                                                                                               |
| Max. and min. transmission               | 0.7461 and 0.6621                                                                                                             |
| Refinement method                        | Full-matrix least-squares on F <sup>2</sup>                                                                                   |
| Data / restraints / parameters           | 20850 / 2 / 983                                                                                                               |
| Goodness-of-fit on F <sup>2</sup>        | 1.021                                                                                                                         |
| Final R indices [I > 2σ(I) = 15415 data] | R1 = 0.0501, wR2 = 0.1261                                                                                                     |
| R indices (all data, 0.70 Å)             | R1 = 0.0760, wR2 = 0.1397                                                                                                     |
| Largest diff. peak and hole              | 1.414 and -1.141 e.Å <sup>-3</sup>                                                                                            |



**Table S5.** Crystal data and structure refinement for  $[\text{NiL3,3'-O}]_2 \cdot \text{Cl}$ .

|                                                  |                                                                                                                                                        |
|--------------------------------------------------|--------------------------------------------------------------------------------------------------------------------------------------------------------|
| Deposition Number                                | 2379618                                                                                                                                                |
| Empirical formula                                | $[\text{C}_{32}\text{H}_{30}\text{N}_6\text{O}_4\text{Ni}]_2[\text{Cl}][\text{C}_{16}\text{H}_{36}\text{N}] \cdot (\text{C}_4\text{H}_8\text{O})_3$    |
| Formula weight                                   | 1736.87                                                                                                                                                |
| Temperature                                      | 93(2) K                                                                                                                                                |
| Wavelength                                       | 0.71073 Å                                                                                                                                              |
| Crystal system                                   | Triclinic                                                                                                                                              |
| Space group                                      | P-1                                                                                                                                                    |
| Unit cell dimensions                             | $a = 11.4188(9)$ Å $\alpha = 97.4909(14)^\circ$<br>$b = 15.6518(13)$ Å $\beta = 100.7164(14)^\circ$<br>$c = 25.611(2)$ Å $\gamma = 104.6492(14)^\circ$ |
| Volume                                           | 4274.9(6) Å <sup>3</sup>                                                                                                                               |
| Z                                                | 2                                                                                                                                                      |
| Density (calculated)                             | 1.349 Mg/m <sup>3</sup>                                                                                                                                |
| Absorption coefficient                           | 0.541 mm <sup>-1</sup>                                                                                                                                 |
| F(000)                                           | 1848                                                                                                                                                   |
| Crystal color                                    | orange                                                                                                                                                 |
| Crystal size                                     | 0.265 x 0.236 x 0.172 mm <sup>3</sup>                                                                                                                  |
| Theta range for data collection                  | 1.460 to 26.419°                                                                                                                                       |
| Index ranges                                     | $-14 \leq h \leq 13, -19 \leq k \leq 19, 0 \leq l \leq 32$                                                                                             |
| Reflections collected                            | 17549                                                                                                                                                  |
| Completeness to theta = 25.242°                  | 100.0 %                                                                                                                                                |
| Absorption correction                            | Semi-empirical from equivalents                                                                                                                        |
| Max. and min. transmission                       | 0.7454 and 0.6744                                                                                                                                      |
| Refinement method                                | Full-matrix least-squares on F <sup>2</sup>                                                                                                            |
| Data / restraints / parameters                   | 17549 / 90 / 1132                                                                                                                                      |
| Goodness-of-fit on F2                            | 1.063                                                                                                                                                  |
| Final R indices [ $I > 2\sigma(I)$ = 15615 data] | R1 = 0.0519, wR2 = 0.1310                                                                                                                              |
| R indices (all data, 0.80 Å)                     | R1 = 0.0616, wR2 = 0.1368                                                                                                                              |
| Largest diff. peak and hole                      | 2.139 and -1.628 e.Å <sup>-3</sup>                                                                                                                     |

**Table S6.** Relevant bond metrics for  $\text{NiL}^{3,3'-\text{O}}\cdot\text{DMSO-d}_6$ .

| <b>Atom 1</b> |               | <b>Atom 2</b> |               | <b>Bond length (Å)</b> |
|---------------|---------------|---------------|---------------|------------------------|
| N3            |               | O5            |               | 2.9082(11)             |
| N4            |               | O5            |               | 3.1416(11)             |
| N5            |               | O5            |               | 3.3966(11)             |
| N6            |               | O5            |               | 2.7956(10)             |
| <b>Atom 1</b> | <b>Atom 2</b> |               | <b>Atom 3</b> | <b>Bond angle (°)</b>  |
| N3            | H3            |               | O5            | 145.963                |
| N4            | H4            |               | O5            | 148.641                |
| N5            | H5            |               | O5            | 140.793                |
| N6            | H6            |               | O5            | 169.447                |

**Table S7.** Relevant bond metrics for  $\text{NiL}^{3,3'-\text{S}}\cdot\text{DMSO}$ .

| <b>Atom 1</b> |               | <b>Atom 2</b> |               | <b>Bond length (Å)</b> |
|---------------|---------------|---------------|---------------|------------------------|
| N3            |               | O3            |               | 2.971(5)               |
| N4            |               | O3            |               | 3.006(15)              |
| N5            |               | O3            |               | 3.157(5)               |
| N6            |               | O3            |               | 2.785(5)               |
| N9            |               | O6            |               | 2.984(5)               |
| N10           |               | O6            |               | 3.278(5)               |
| N11           |               | O6            |               | 3.277(5)               |
| N12           |               | O6            |               | 2.835(9)               |
| <b>Atom 1</b> | <b>Atom 2</b> |               | <b>Atom 3</b> | <b>Bond angle (°)</b>  |
| N3            | H3            |               | O3            | 158.646                |
| N4            | H4            |               | O3            | 157.419                |
| N5            | H5            |               | O3            | 148.989                |
| N6            | H6            |               | O3            | 173.156                |
| N9            | H9            |               | O6            | 172.648                |
| N10           | H10           |               | O6            | 150.475                |
| N11           | H11           |               | O6            | 149.309                |
| N12           | H12           |               | O6            | 161.470                |

**Table S8.** Relevant bond metrics for  $\text{NiL}^{3,3'-\text{O}}\cdot(\text{H}_2\text{O})_2(\text{THF})_2$ .

| Atom 1 |        | Atom 2 |                | Bond length (Å) |
|--------|--------|--------|----------------|-----------------|
| N3     |        | O8     |                | 3.324(3)        |
| N4     |        | O8     |                | 2.871(3)        |
| N5     |        | O7     |                | 3.020(3)        |
| N6     |        | O7     |                | 3.036(3)        |
| O7     |        | O1     |                | 2.927(2)        |
| O7     |        | O5     |                | 2.708(2)        |
| O8     |        | O6     |                | 2.733(3)        |
| Atom 1 | Atom 2 | Atom 3 | Bond angle (°) |                 |
| N3     | H3     | O8     | 130.308        |                 |
| N4     | H4     | O8     | 168.216        |                 |
| N5     | H5     | O7     | 155.270        |                 |
| N6     | H6     | O7     | 152.506        |                 |
| O7     | H72    | O1     | 173.513        |                 |
| O7     | H71    | O5     | 173.532        |                 |
| O8     | H81    | O6     | 162.226        |                 |

**Table S9.** Relevant bond metrics for  $\text{NiL}^{5-\text{O}}$ .

| Atom 1 |        | Atom 2 |                | Bond length (Å) |
|--------|--------|--------|----------------|-----------------|
| N3     |        | O8     |                | 2.754(3)        |
| N4     |        | O7     |                | 3.150(3)        |
| N11    |        | O5     |                | 2.906(3)        |
| N12    |        | O4     |                | 2.986(3)        |
| Atom 1 | Atom 2 | Atom 3 | Bond angle (°) |                 |
| N3     | H3     | O8     | 165.548        |                 |
| N4     | H4     | O7     | 160.484        |                 |
| N11    | H11    | O5     | 159.769        |                 |
| N12    | H12    | O4     | 161.248        |                 |

**Table S10.** Relevant bond metrics for  $[\text{NiL}^{3,3'-\text{O}}]_2 \cdot \text{Cl}^-$ .

| <b>Atom 1</b> | <b>Atom 2</b> | <b>Bond length (Å)</b> |                       |
|---------------|---------------|------------------------|-----------------------|
| N3            | Cl1           | 3.588(3)               |                       |
| N4            | Cl1           | 3.202(3)               |                       |
| N5            | Cl1           | 3.444(3)               |                       |
| N6            | Cl1           | 3.284(3)               |                       |
| N9            | Cl1           | 3.599(3)               |                       |
| N10           | Cl1           | 3.228(3)               |                       |
| N11           | Cl1           | 3.541(3)               |                       |
| N12           | Cl1           | 3.235(3)               |                       |
| <b>Atom 1</b> | <b>Atom 2</b> | <b>Atom 3</b>          | <b>Bond angle (°)</b> |
| Ni1           | Cl1           | Ni2                    | 89.022                |
| N3            | H3            | Cl1                    | 148.869               |
| N4            | H4            | Cl1                    | 170.324               |
| N5            | H5            | Cl1                    | 149.175               |
| N6            | H6            | Cl1                    | 166.221               |
| N9            | H9            | Cl1                    | 146.884               |
| N10           | H10           | Cl1                    | 173.632               |
| N11           | H11           | Cl1                    | 158.215               |
| N12           | H12           | Cl1                    | 178.275               |

## Titration Curves and Relevant NMR Spectra

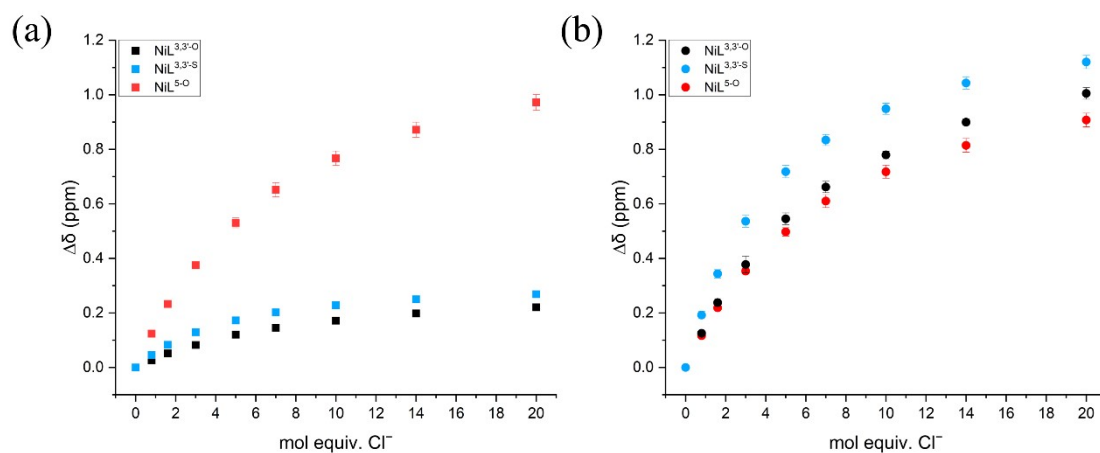

**Figure S2.** (a) Titration curve of the change in chemical shift ( $\Delta\delta$ ) of  $\text{N}_\alpha\text{-H}$  upon titration of  $\text{Cl}^-$ . (b) Titration curve of the change in chemical shift ( $\Delta\delta$ ) of  $\text{N}_\beta\text{-H}$  upon titration of  $\text{Cl}^-$ .

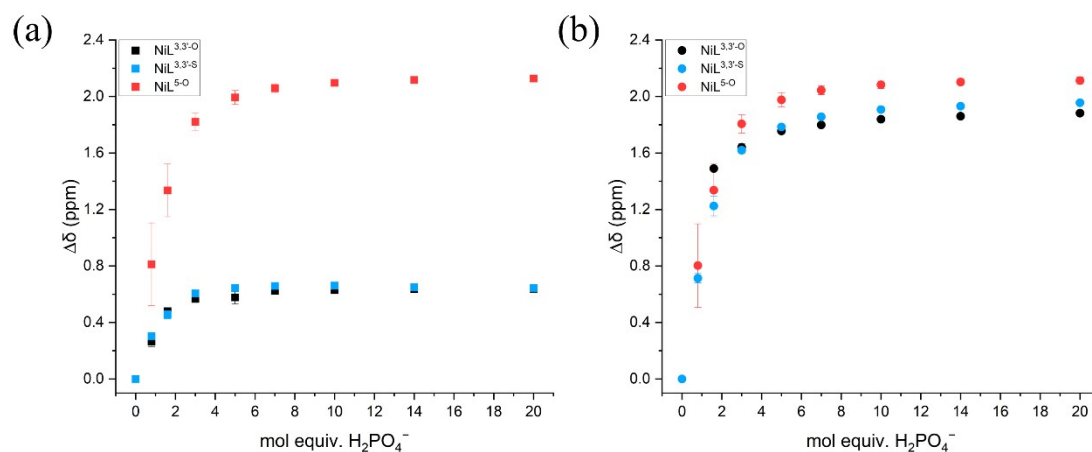

**Figure S3.** (a) Titration curve of the change in chemical shift ( $\Delta\delta$ ) of  $\text{N}_\alpha\text{-H}$  upon titration of  $\text{H}_2\text{PO}_4^-$ . (b) Titration curve of the change in chemical shift ( $\Delta\delta$ ) of  $\text{N}_\beta\text{-H}$  upon titration of  $\text{H}_2\text{PO}_4^-$ .

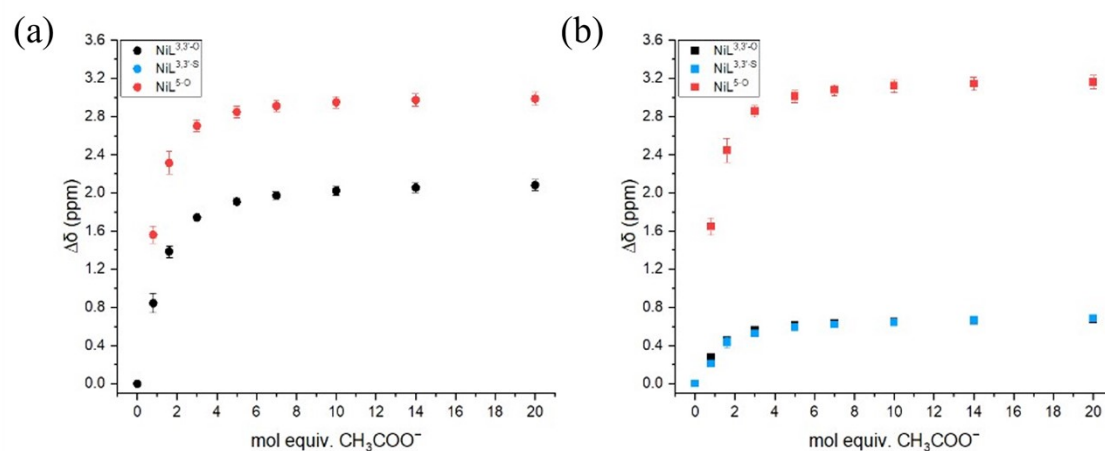

**Figure S4.** (a) Titration curve of the change in chemical shift ( $\Delta\delta$ ) of  $\text{N}_\alpha\text{-H}$  upon titration of  $\text{CH}_3\text{COO}^-$ . (b) Titration curve of the change in chemical shift ( $\Delta\delta$ ) of  $\text{N}_\beta\text{-H}$  upon titration of  $\text{CH}_3\text{COO}^-$ .

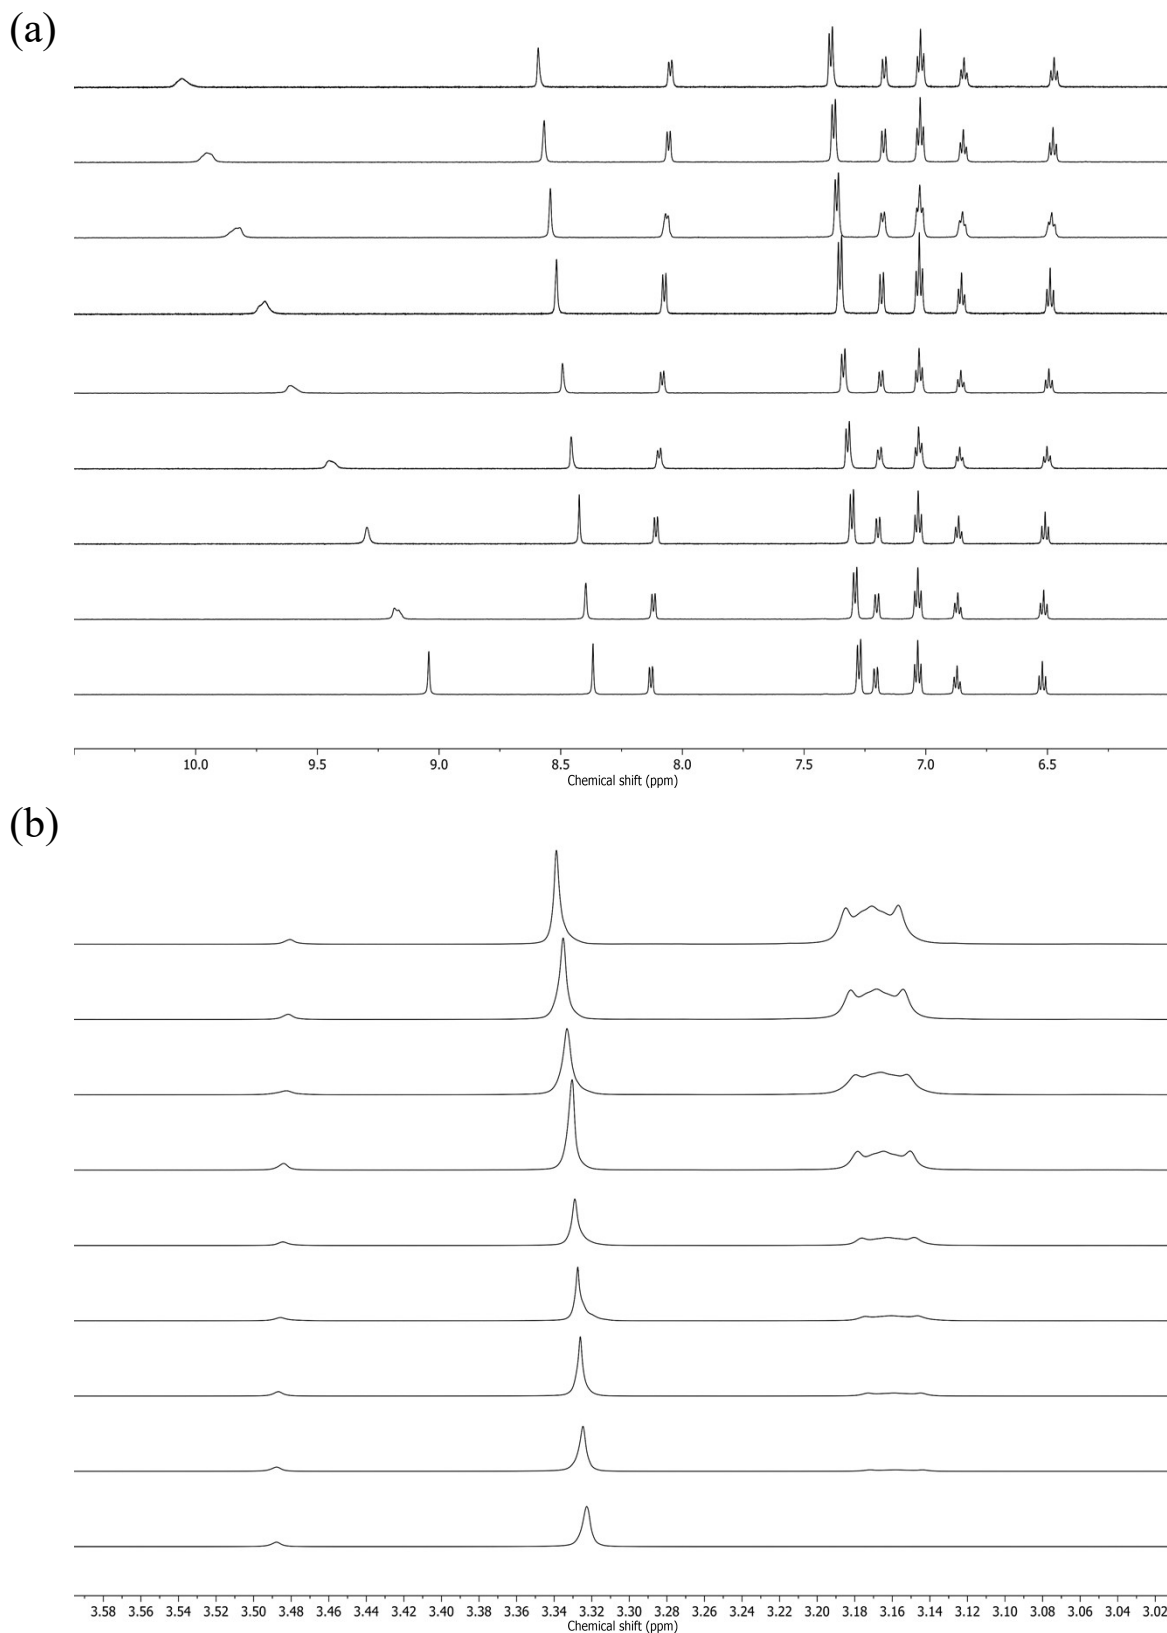

**Figure S5.**  $^1\text{H}$  NMR spectra observing the titration of  $\text{Cl}^-$  into  $\text{NiL}^{3,3'-\text{O}}$  **(a)** in the aromatic region, where  $\text{N}_a\text{-H}$  starts from 9.04 ppm and  $\text{N}_b\text{-H}$  starts from 8.37 ppm. **(b)** following the water signal beginning at 3.32 ppm. From the bottom up: 0, 0.8, 1.6, 3, 5, 7, 10, 14, 20 mole equivalents of  $\text{Cl}^-$  titrated.

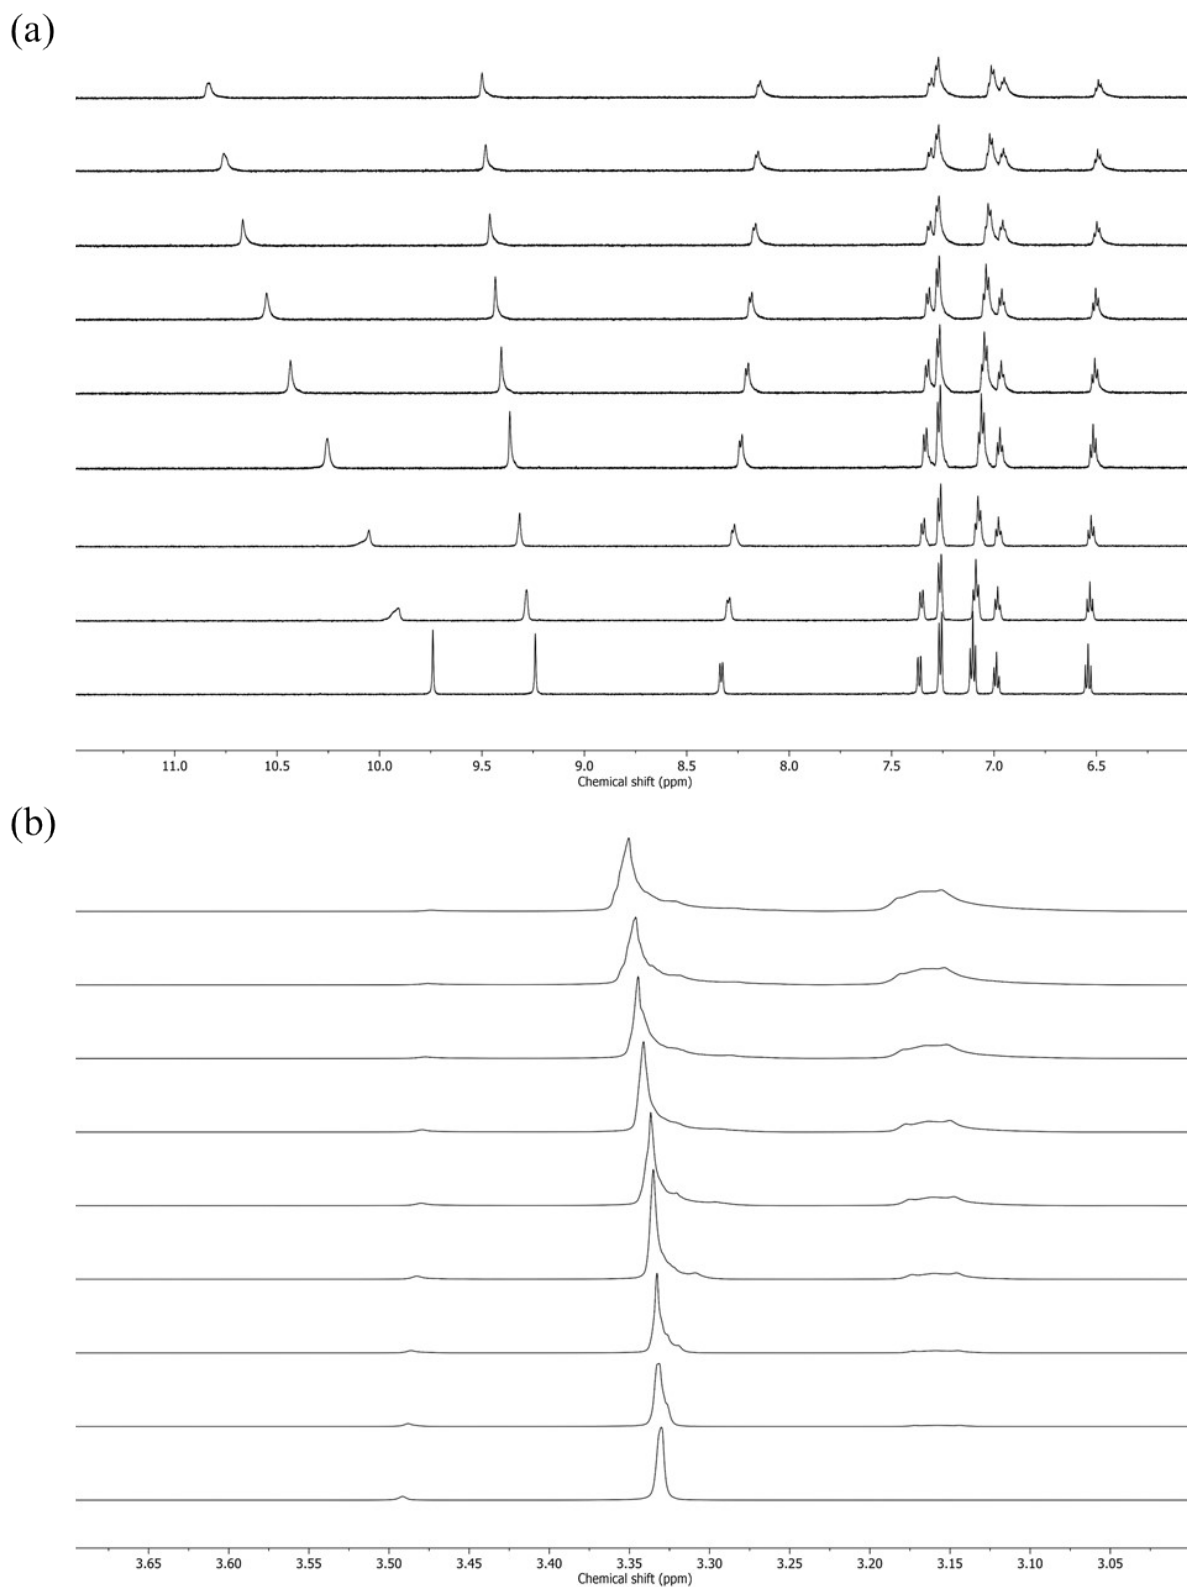

**Figure S6.**  $^1\text{H}$  NMR spectra observing the titration of  $\text{Cl}^-$  into  $\text{NiL}^{3,3'-\text{S}}$  **(a)** in the aromatic region, where  $\text{N}_a\text{-H}$  starts from 9.74 ppm and  $\text{N}_b\text{-H}$  starts from 9.24 ppm. **(b)** following the water signal beginning at 3.32 ppm. From the bottom up: 0, 0.8, 1.6, 3, 5, 7, 10, 14, 20 mole equivalents of  $\text{Cl}^-$  titrated.

(a)

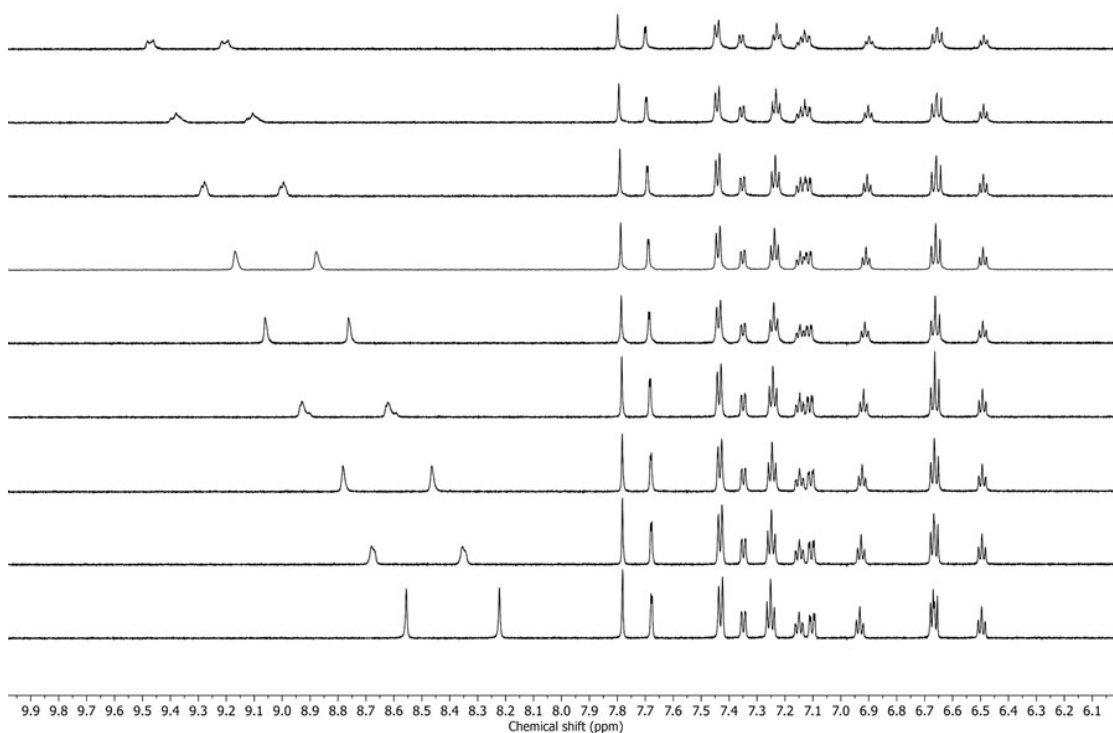

(b)

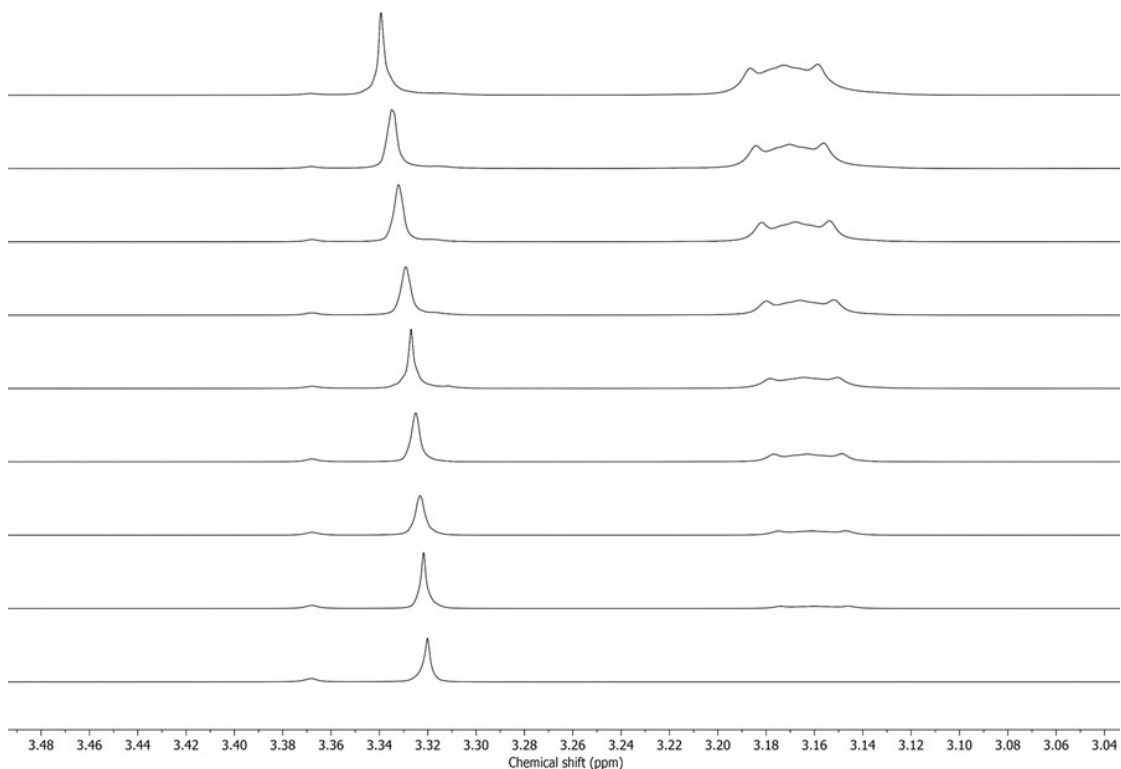

**Figure S7.**  $^1\text{H}$  NMR spectra observing the titration of  $\text{Cl}^-$  into  $\text{NiL}^{5-0}$  **(a)** in the aromatic region, where  $\text{N}_a\text{-H}$  starts from 8.55 ppm and  $\text{N}_b\text{-H}$  starts from 8.22 ppm. **(b)** following the water signal beginning at 3.32 ppm. From the bottom up: 0, 0.8, 1.6, 3, 5, 7, 10, 14, 20 mole equivalents of  $\text{Cl}^-$  titrated.



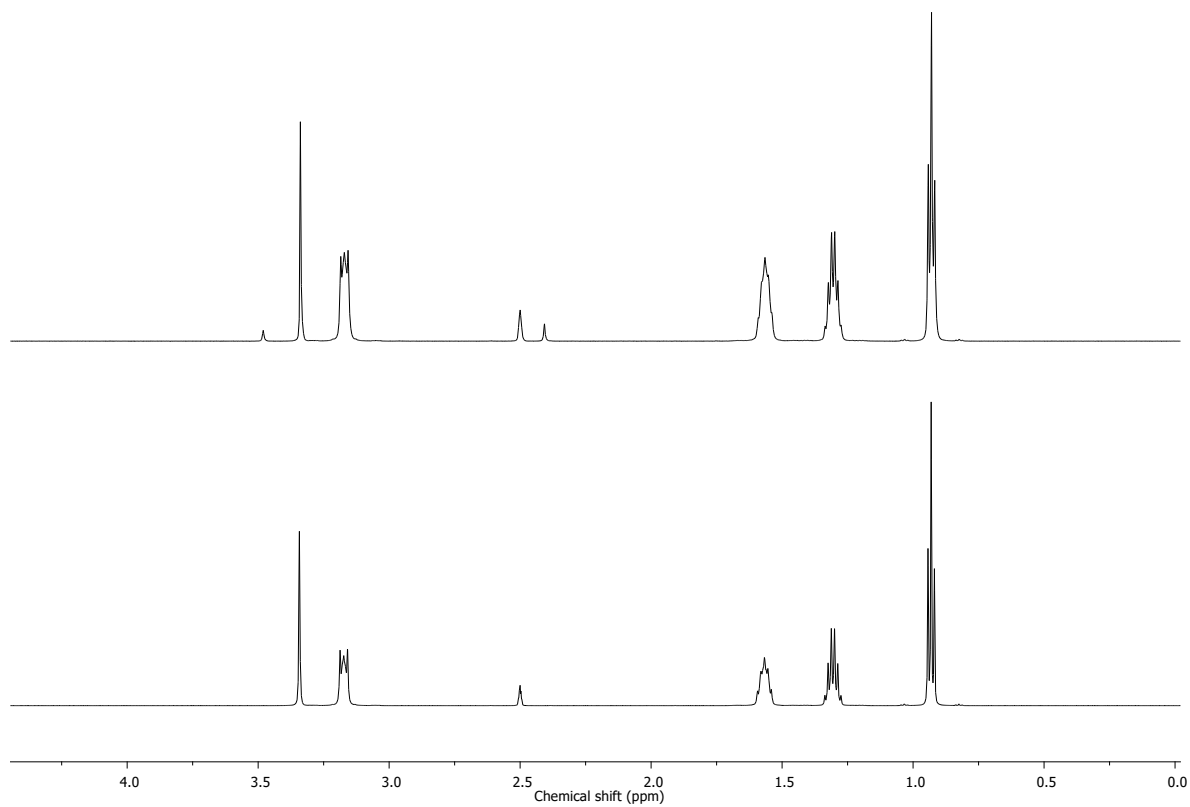

**Figure S8.** <sup>1</sup>H NMR spectra observing the addition of 250 μL TBACl into NiL<sup>3,3'-O</sup> (500 μL; top) and plain DMSO-*d*<sub>6</sub> (500 μL; bottom).

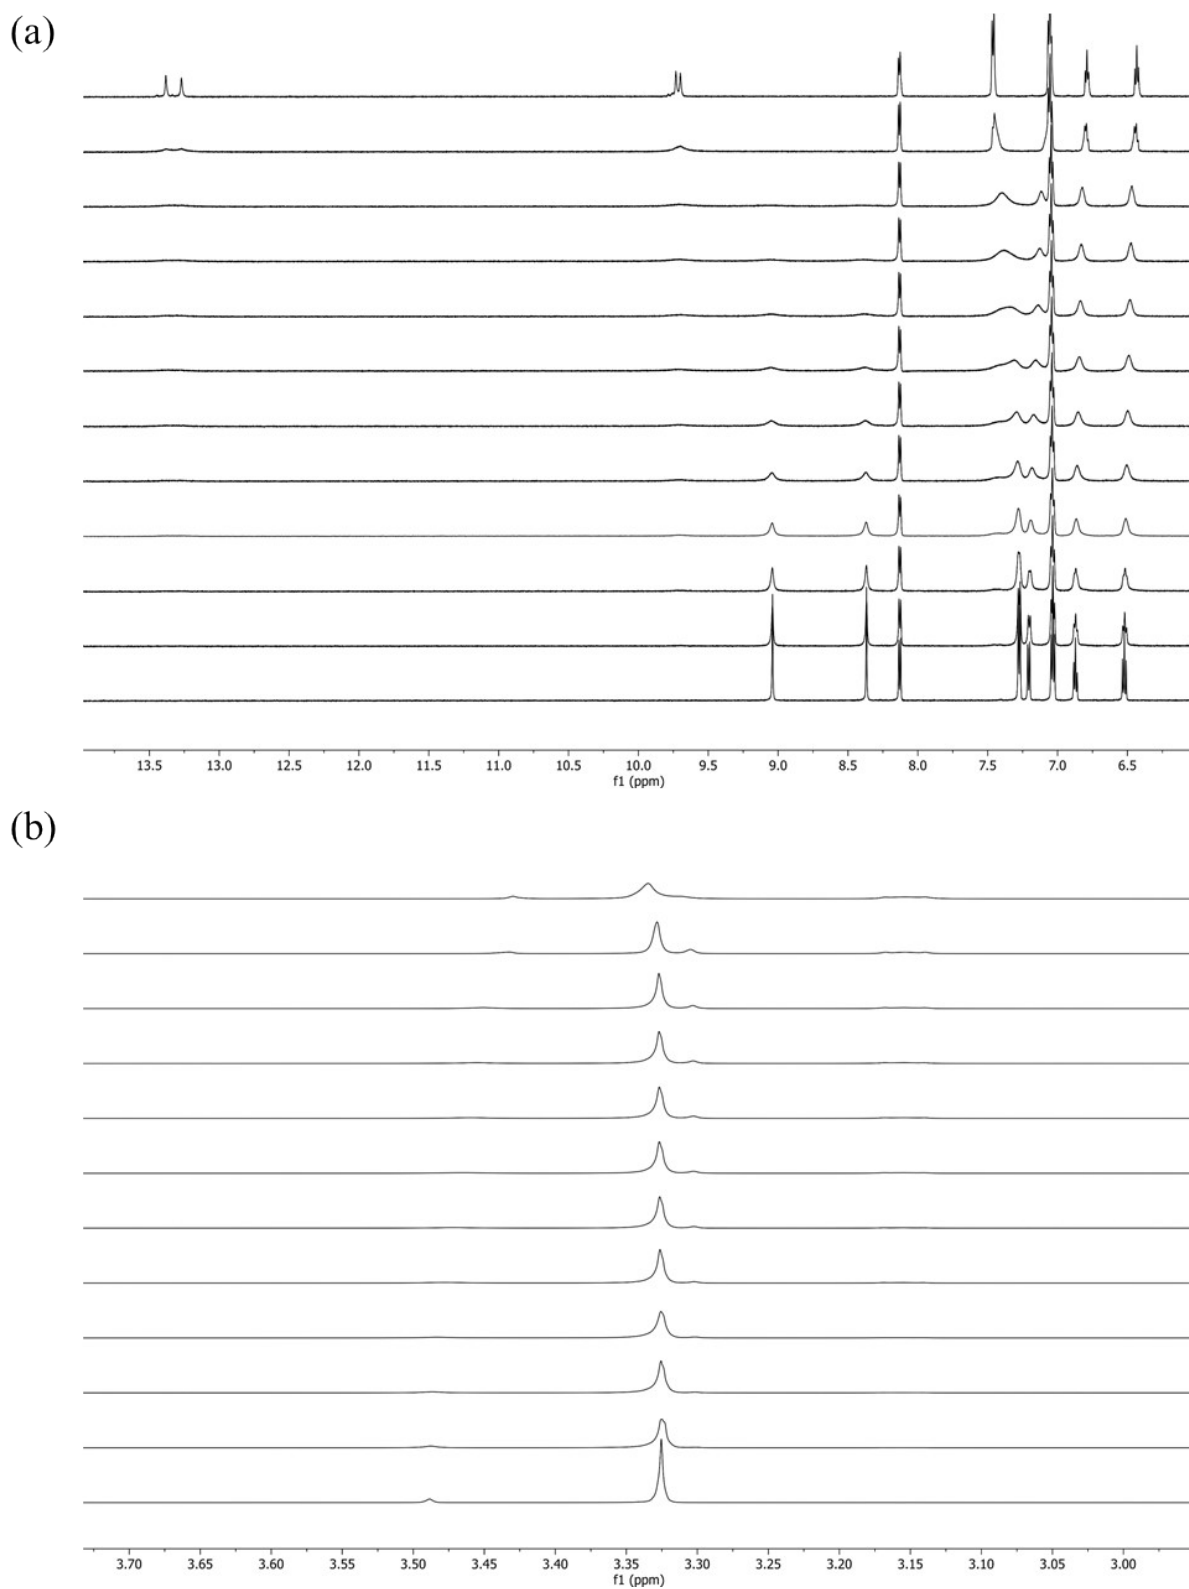

**Figure S9.**  $^1\text{H}$  NMR spectra observing the titration of  $\text{F}^-$  into  $\text{NiL}^{3,3'\text{-O}}$  **(a)** in the aromatic region, where  $\text{N}_a\text{-H}$  starts from 9.04 ppm and  $\text{N}_b\text{-H}$  starts from 8.37 ppm. **(b)** following the water signal beginning at 3.32 ppm. From the bottom up: 0, 0.08, 0.16, 0.24, 0.32, 0.40, 0.48, 0.56, 0.64, 0.72, 1.12, 1.52 mole equivalents of  $\text{F}^-$  titrated.

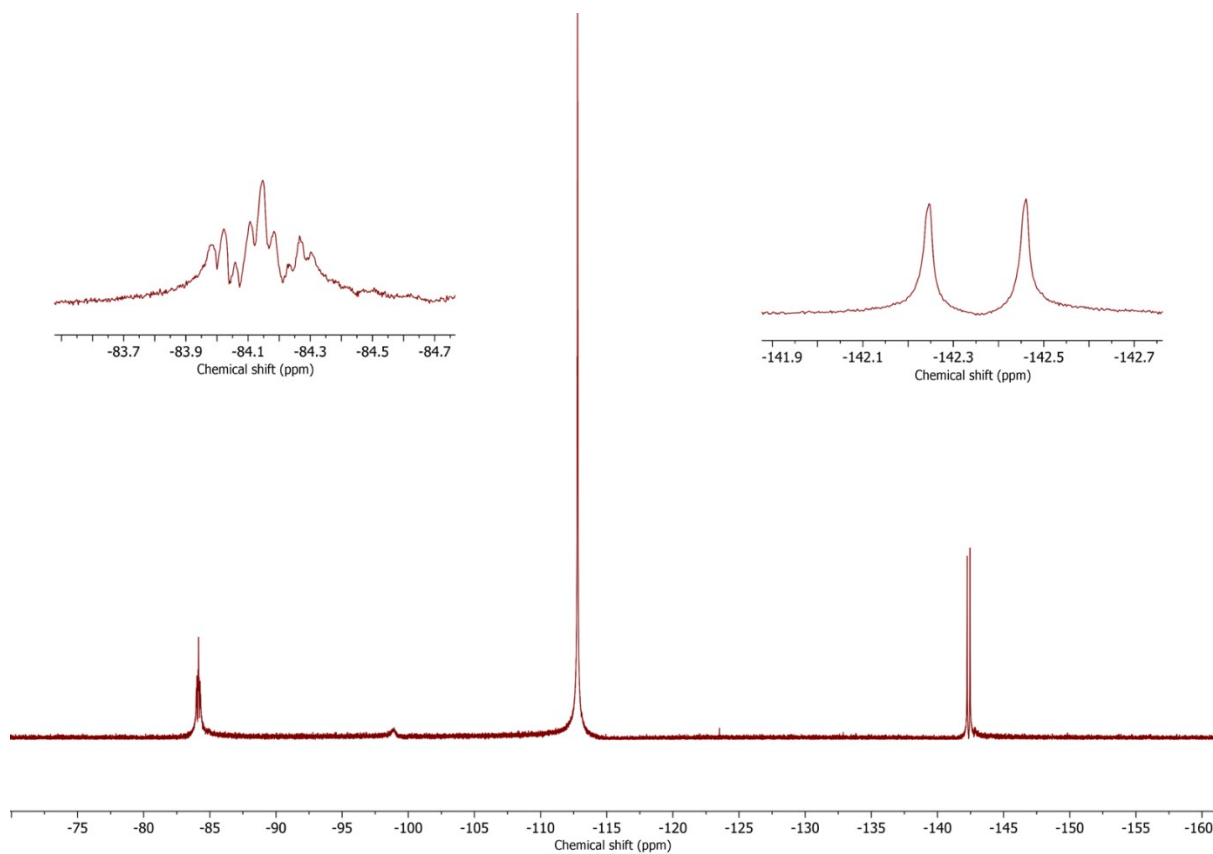

**Figure S10.**  $^{19}\text{F}$  NMR spectra of  $\text{NiL}^{3,3'-\text{O}}$  with 2 mole equivalents of  $\text{F}^-$ . Inset: zoomed in spectrum of the signal at -84 ppm corresponding to the bound  $\text{F}^-$  (left), zoomed in spectrum of the signal at -142 ppm corresponding to  $\text{HF}_2^-$  (right). The signal at -112.8 ppm corresponds to 1-fluorobenzene, added as an internal standard.

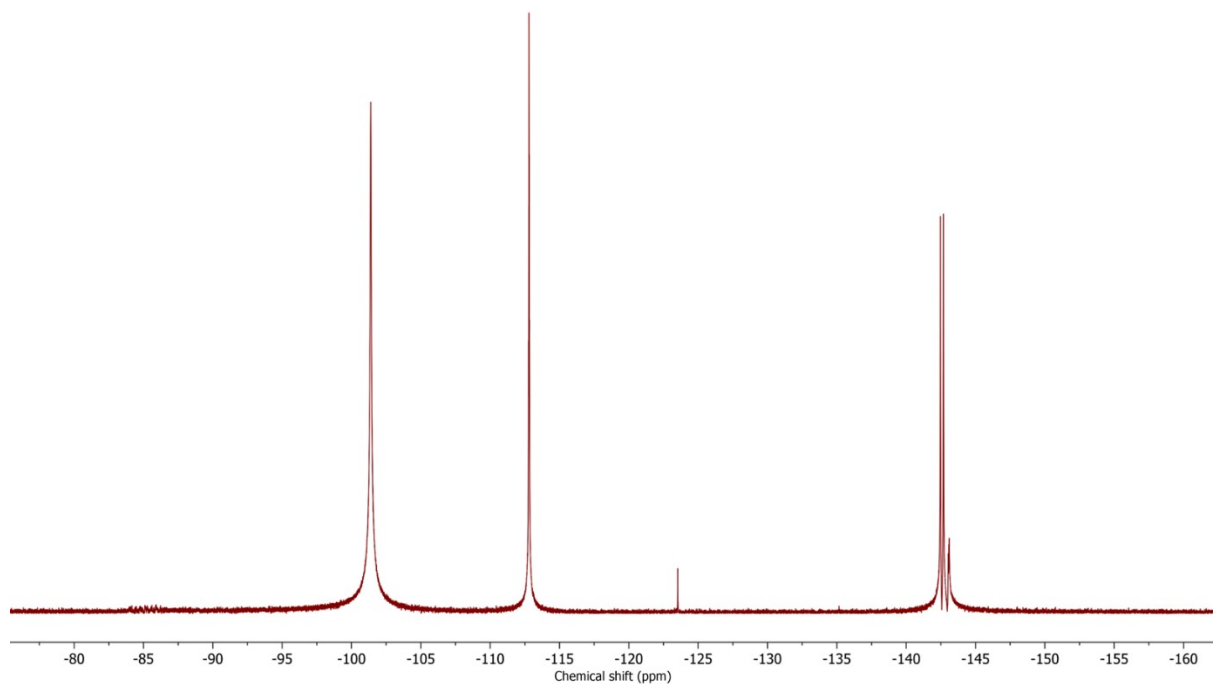

**Figure S11.**  $^{19}\text{F}$  NMR spectrum of  $\text{NiL}^{3,3'-\text{O}}$  with 10 mole equivalents of  $\text{F}^-$ . The signal at -112.8 ppm corresponds to 1-fluorobenzene, added as an internal standard.

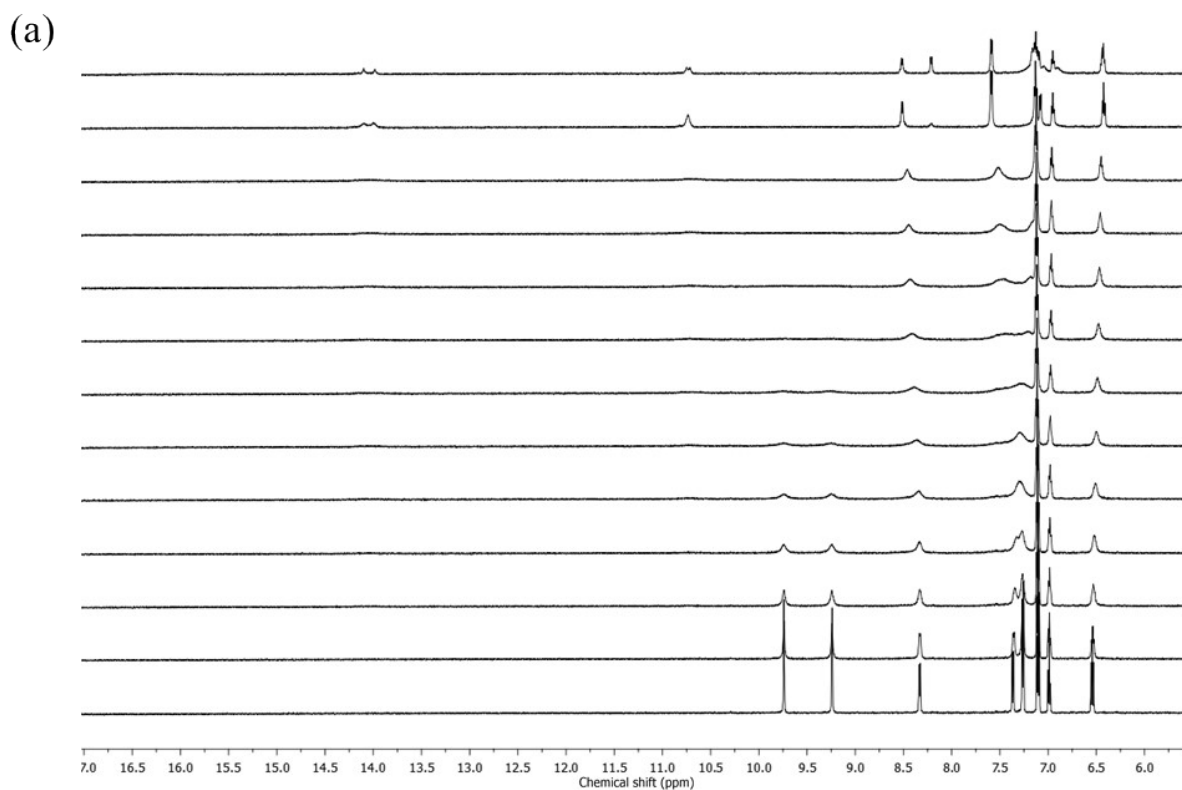

(b)

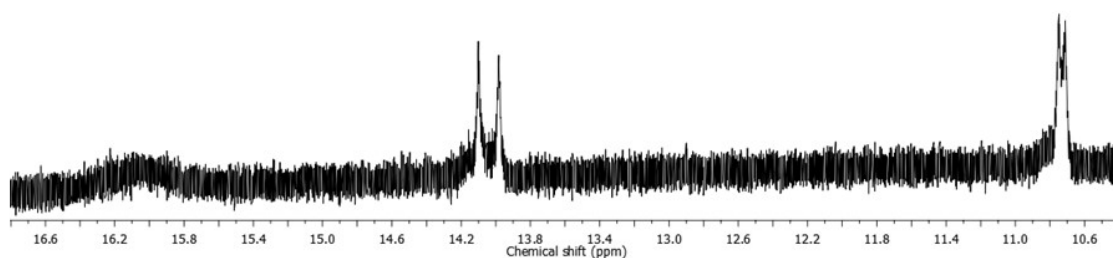

**Figure S12.**  $^1\text{H}$  NMR spectra observing the titration of  $\text{F}^-$  into  $\text{NiL}^{3,3'\text{-S}}$  **(a)** in the aromatic region, where  $\text{N}_a\text{-H}$  starts from 9.74 ppm and  $\text{N}_b\text{-H}$  starts from 9.24 ppm. From the bottom up: 0, 0.08, 0.16, 0.24, 0.32, 0.40, 0.48, 0.56, 0.64, 0.72, 0.80, 1.60, 2.40 mole equivalents of  $\text{F}^-$  titrated. **(b)** The  $^1\text{H}$  NMR spectrum at 2.40 mole equivalents of  $\text{F}^-$  titrated, to emphasize the doublets formed at 14.04 ( $^1J_{\text{H-F}} = 71$  Hz) and 10.73 ( $^1J_{\text{H-F}} = 22$  Hz) ppm, and the beginning of the growth of the  $\text{HF}^-$  signal at 16.1 ppm.

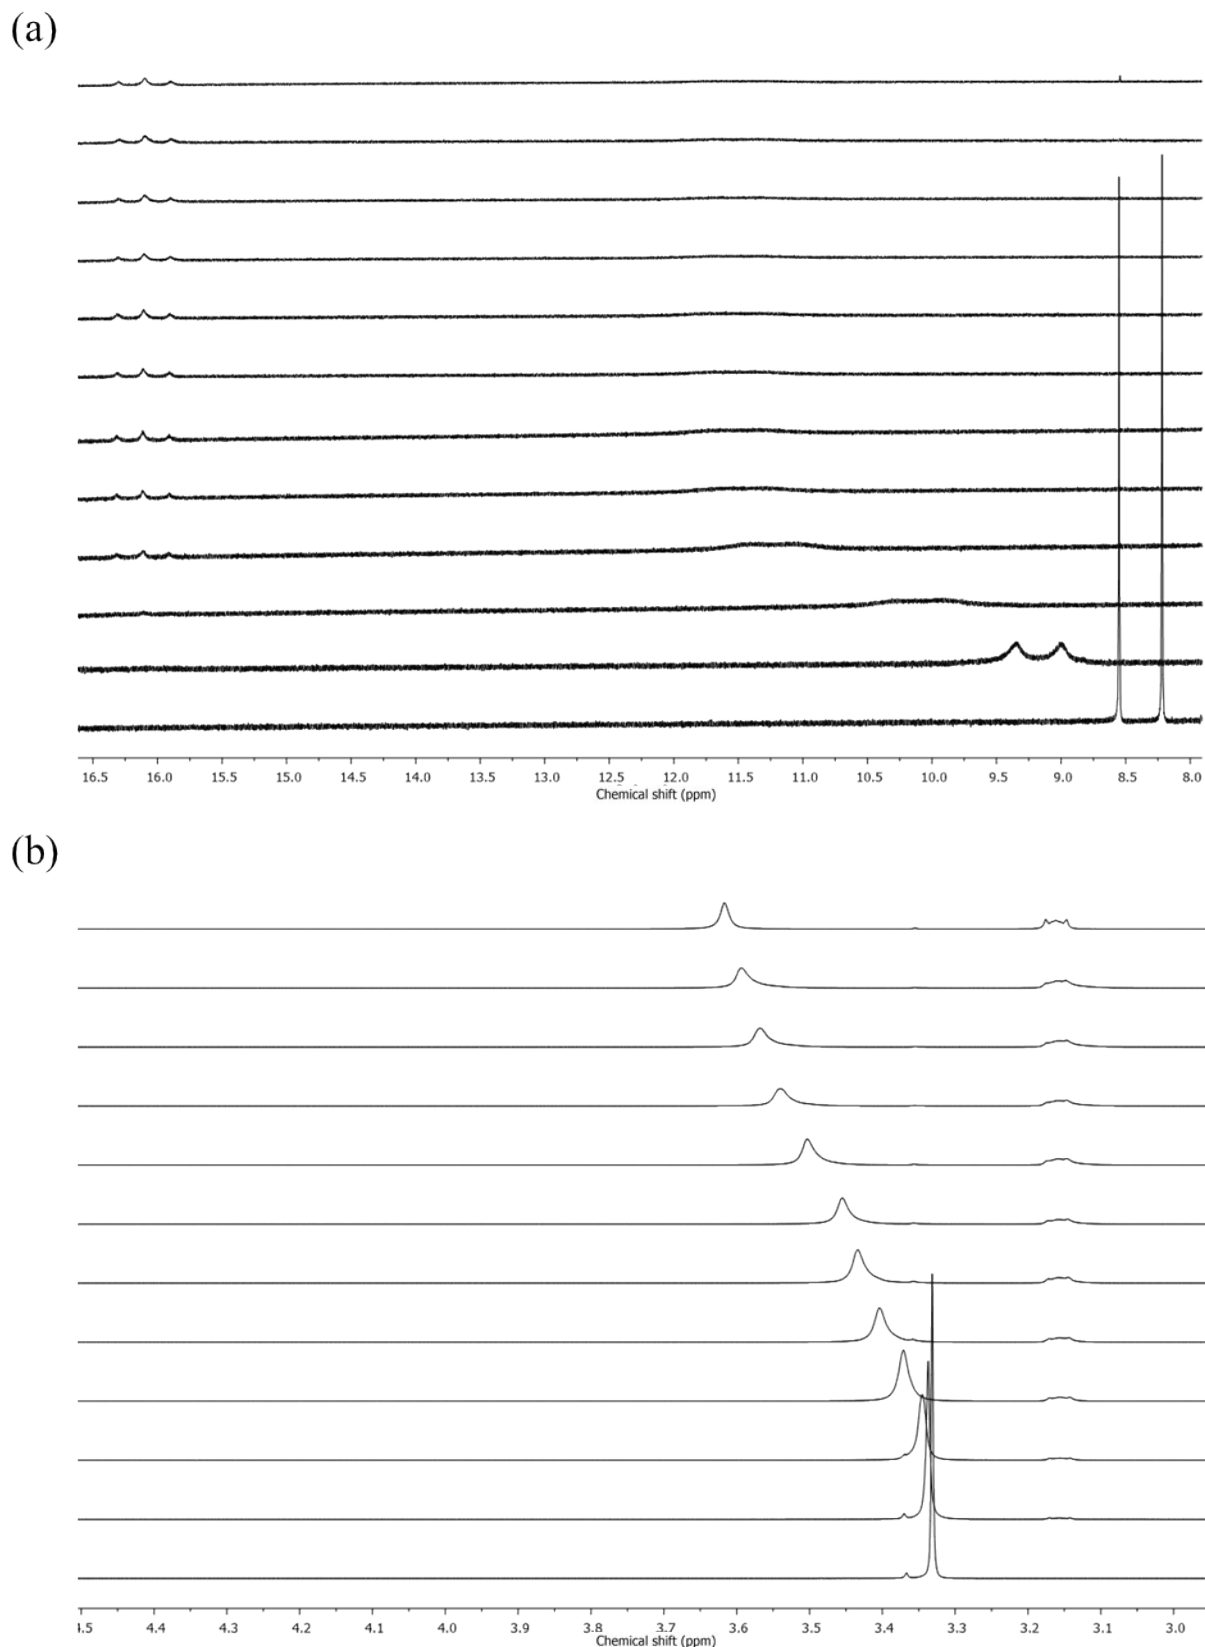

**Figure S13.**  $^1\text{H}$  NMR spectra observing the titration of  $\text{F}^-$  into  $\text{NiL}^{5-\text{O}}$  **(a)** in the aromatic region, where  $\text{N}_a\text{-H}$  starts from 8.55 ppm and  $\text{N}_b\text{-H}$  starts from 8.22 ppm. **(b)** following the water signal beginning at 3.33 ppm. From the bottom up: 0.8, 1.6, 2.4, 3.2, 4.0, 4.8, 5.6, 6.4, 7.2, 8.0, 8.8, 9.6, 10.4, 11.2, 12.0 mole equivalents of  $\text{F}^-$  titrated.

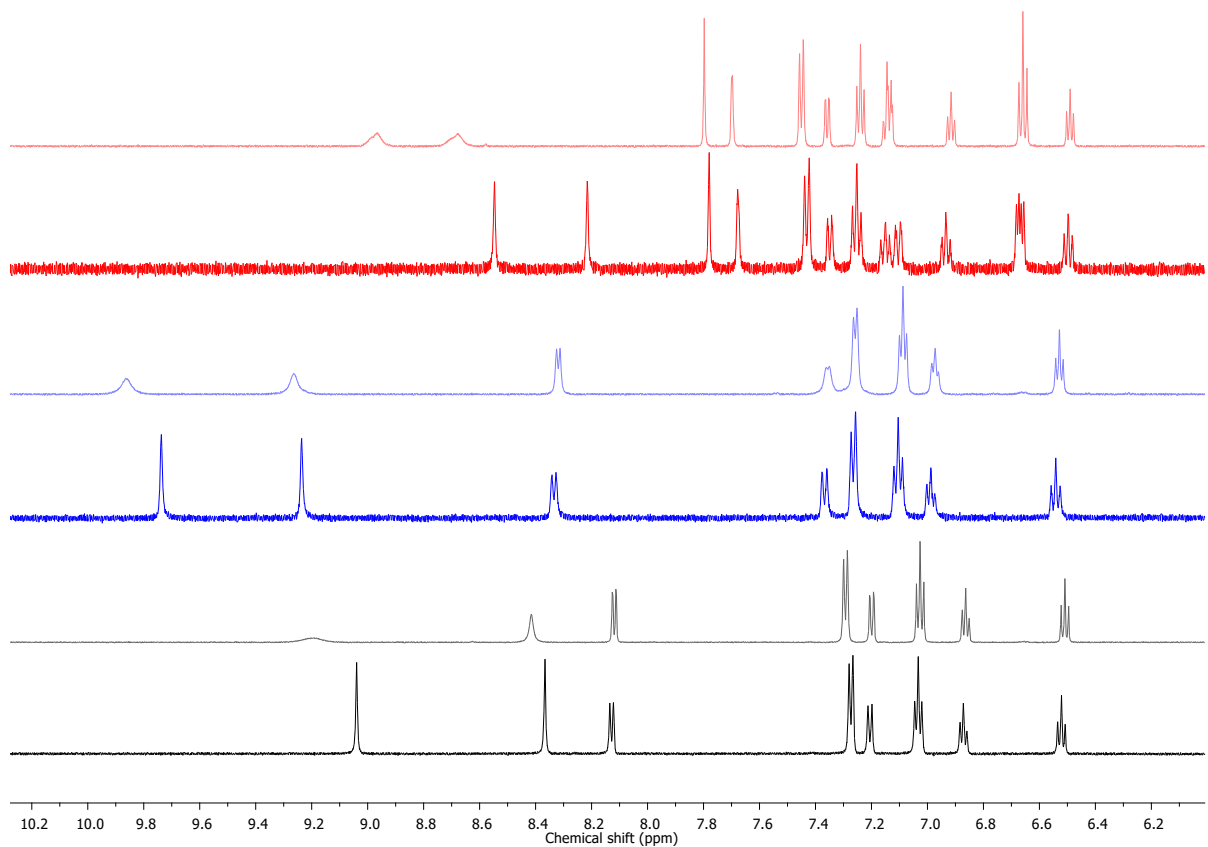

**Figure S14.** <sup>1</sup>H NMR spectra displaying 0 equiv (dark) and 20 equiv (light) TBABr added to **NiL**<sup>3,3'-O</sup> (black), **NiL**<sup>3,3'-S</sup> (blue), and **NiL**<sup>5-O</sup> (red).

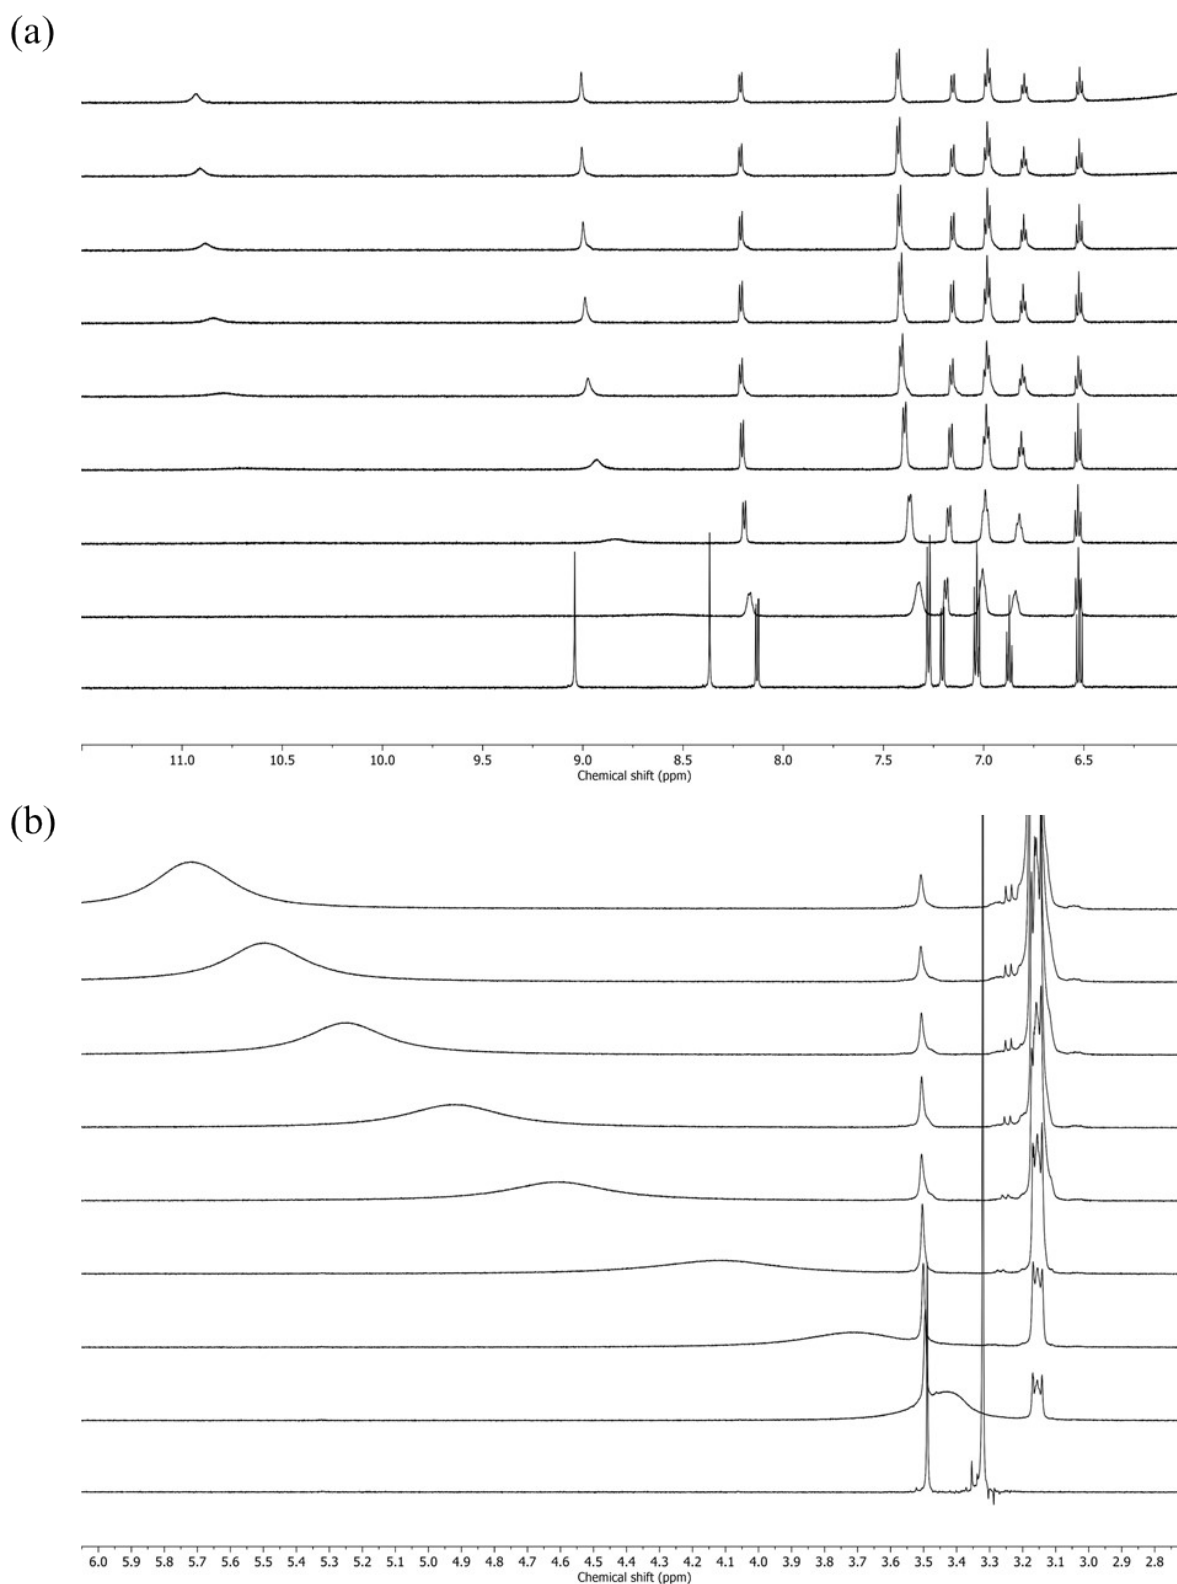

**Figure S15.**  $^1\text{H}$  NMR spectra observing the titration of  $\text{H}_2\text{PO}_4^-$  into  $\text{NiL}^{3,3'-\text{O}}$  **(a)** in the aromatic region, where  $\text{N}_a\text{-H}$  starts from 9.04 ppm and  $\text{N}_b\text{-H}$  starts from 8.37 ppm. **(b)** following the water signal beginning at 3.33 ppm. From the bottom up: 0, 0.8, 1.6, 3, 5, 7, 10, 14, 20 mole equivalents of  $\text{H}_2\text{PO}_4^-$  titrated.

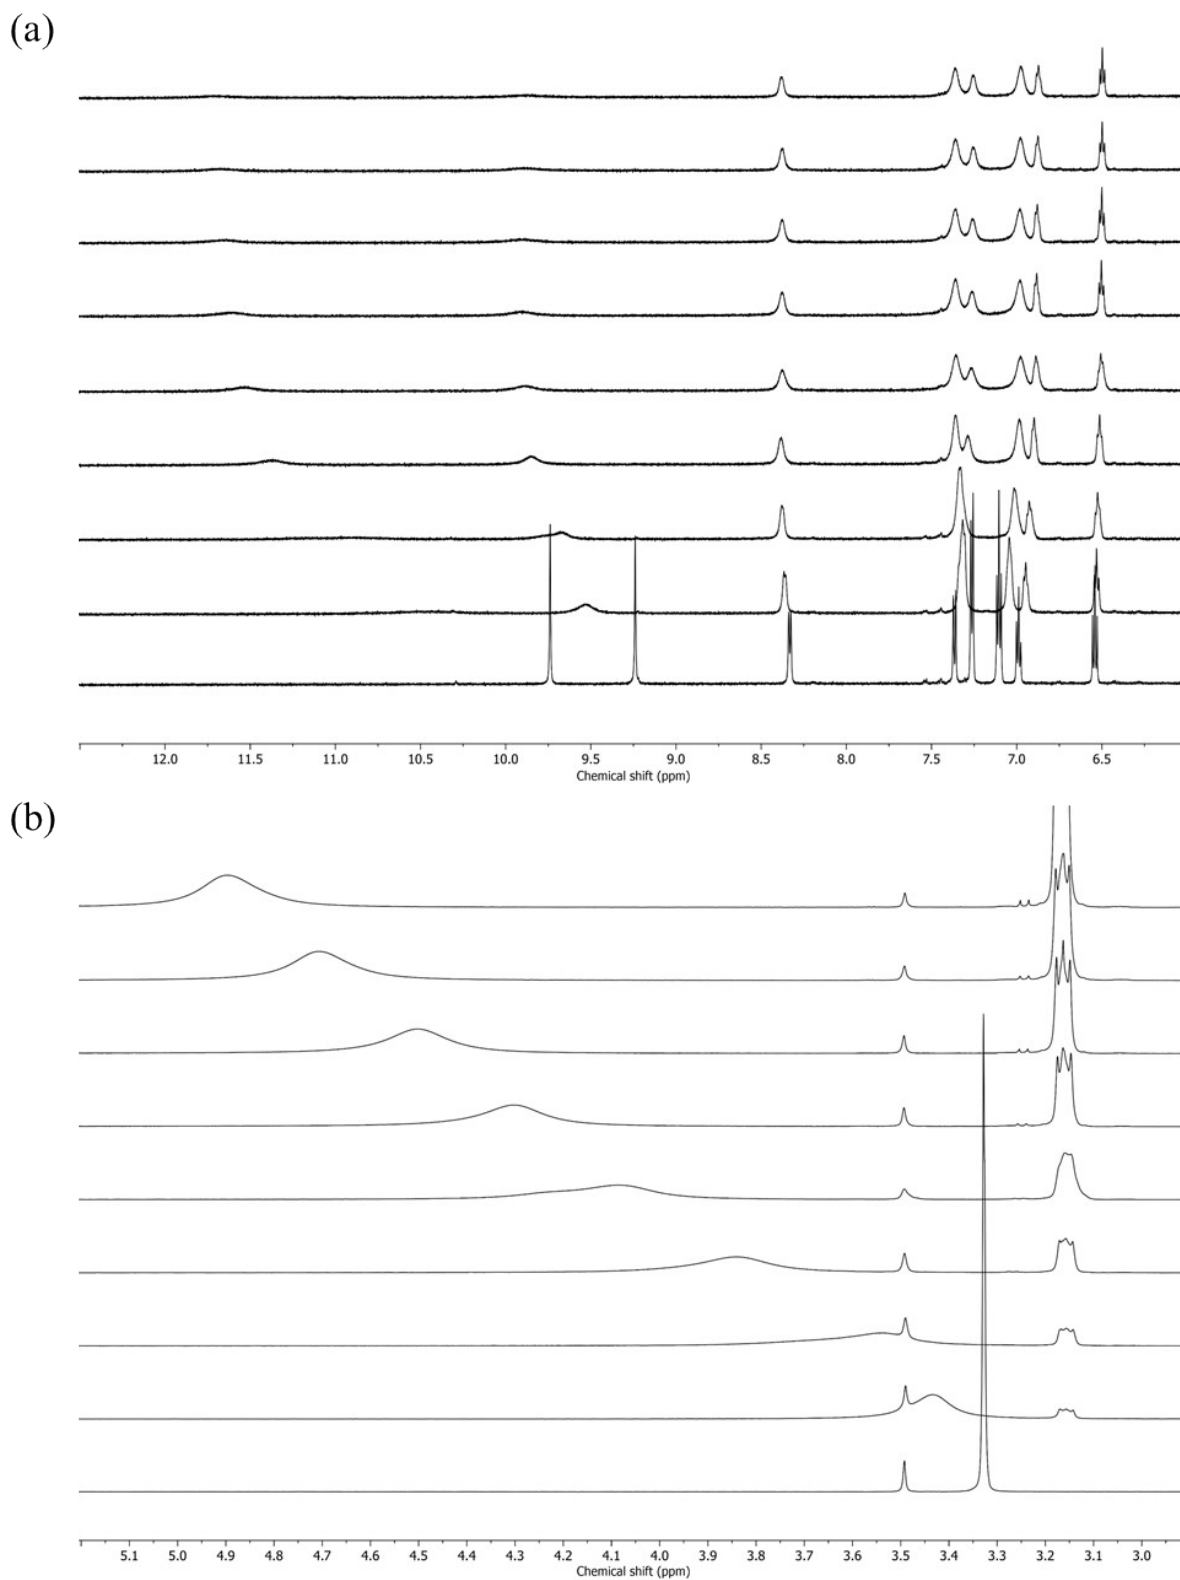

**Figure S16.**  $^1\text{H}$  NMR spectra observing the titration of  $\text{H}_2\text{PO}_4^-$  into  $\text{NiL}^{3,3'-\text{S}}$  **(a)** in the aromatic region, where  $\text{N}_a\text{-H}$  starts from 9.74 ppm and  $\text{N}_b\text{-H}$  starts from 9.24 ppm. **(b)** following the water signal beginning at 3.32 ppm. From the bottom up: 0, 0.8, 1.6, 3, 5, 7, 10, 14, 20 mole equivalents of  $\text{H}_2\text{PO}_4^-$  titrated.



(a)

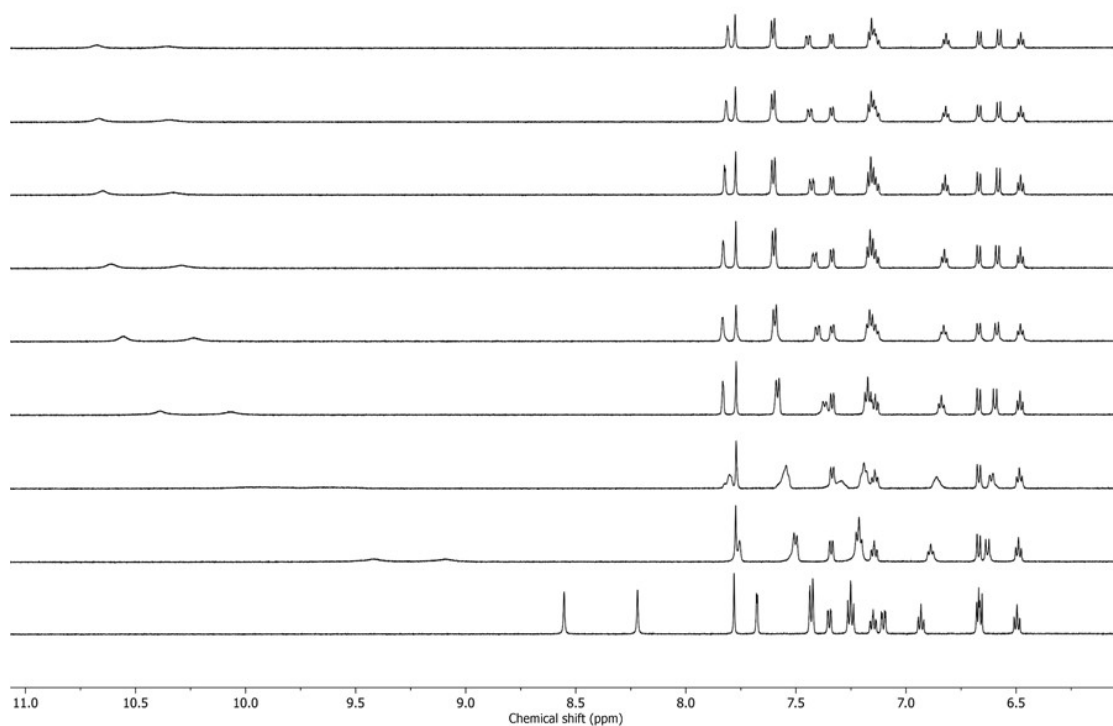

(b)

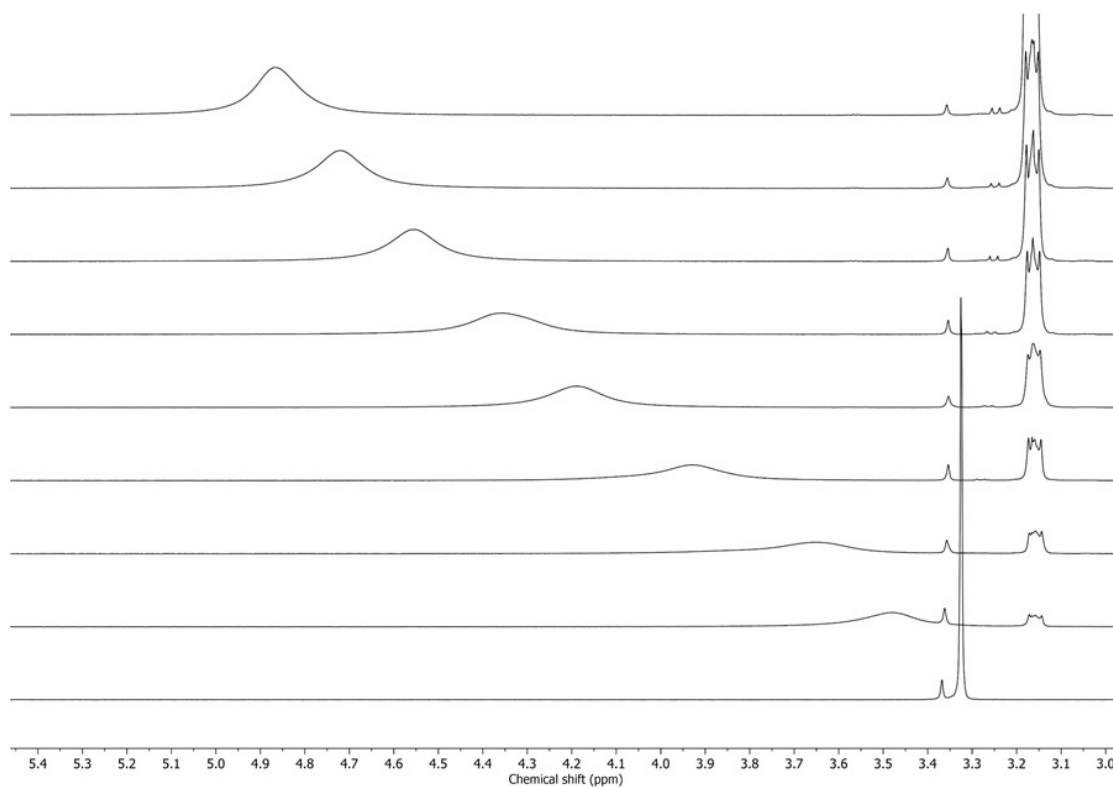

**Figure S17.**  $^1\text{H}$  NMR spectra observing the titration of  $\text{H}_2\text{PO}_4^-$  into  $\text{NiL}^{5-\text{O}}$  **(a)** in the aromatic region, where  $\text{N}_a\text{-H}$  starts from 8.55 ppm and  $\text{N}_b\text{-H}$  starts from 8.22 ppm. **(b)** following the water signal beginning at 3.32 ppm. From the bottom up: 0, 0.8, 1.6, 3, 5, 7, 10, 14, 20 mole equivalents of  $\text{H}_2\text{PO}_4^-$  titrated.

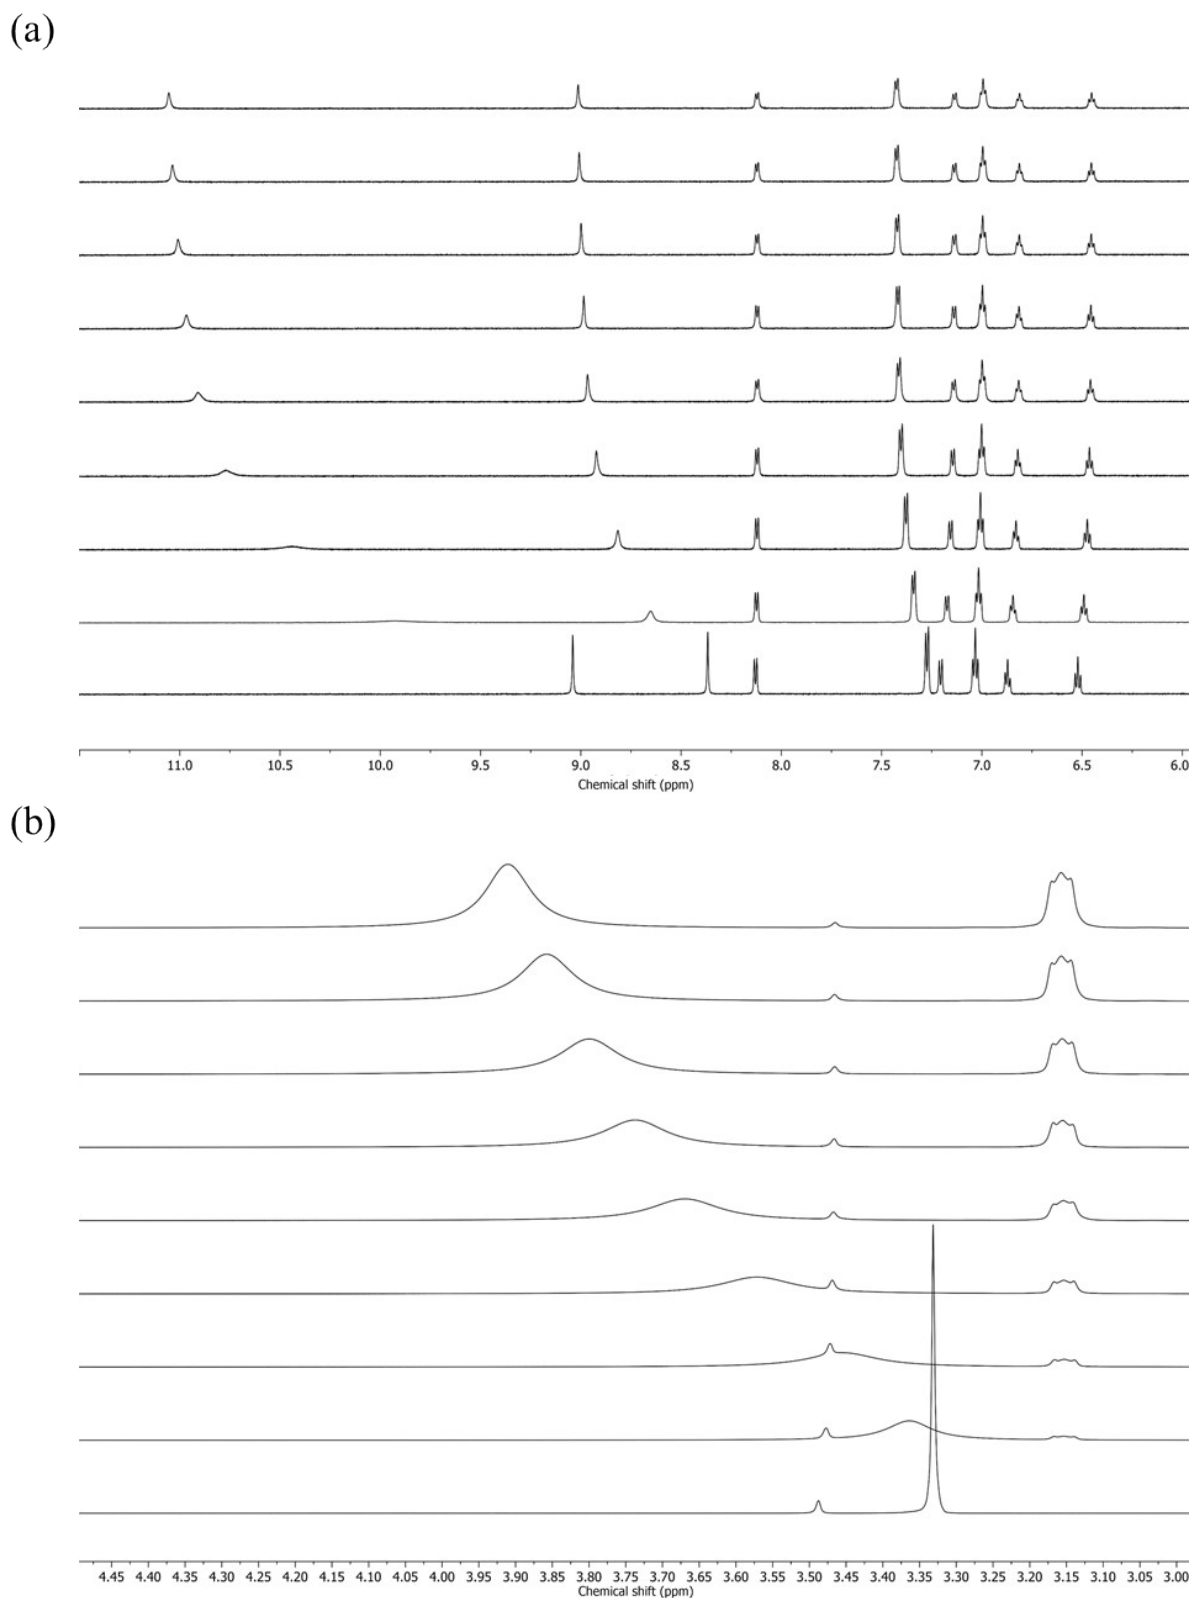

**Figure S18.**  $^1\text{H}$  NMR spectra observing the titration of  $\text{CH}_3\text{COO}^-$  into  $\text{NiL}^{3,3'-\text{O}}$  **(a)** in the aromatic region, where  $\text{N}_a\text{-H}$  starts from 9.04 ppm and  $\text{N}_b\text{-H}$  starts from 8.37 ppm. **(b)** following the water signal beginning at 3.32 ppm. From the bottom up: 0, 0.8, 1.6, 3, 5, 7, 10, 14, 20 mole equivalents of  $\text{CH}_3\text{COO}^-$  titrated.

(a)

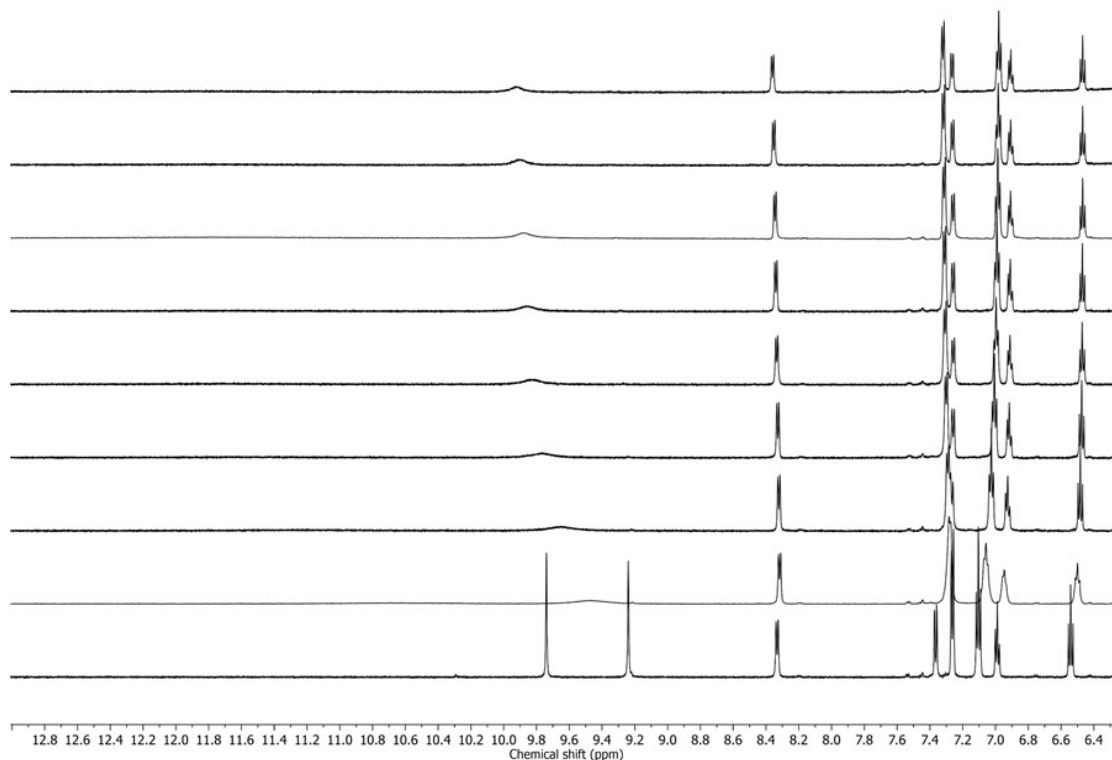

(b)

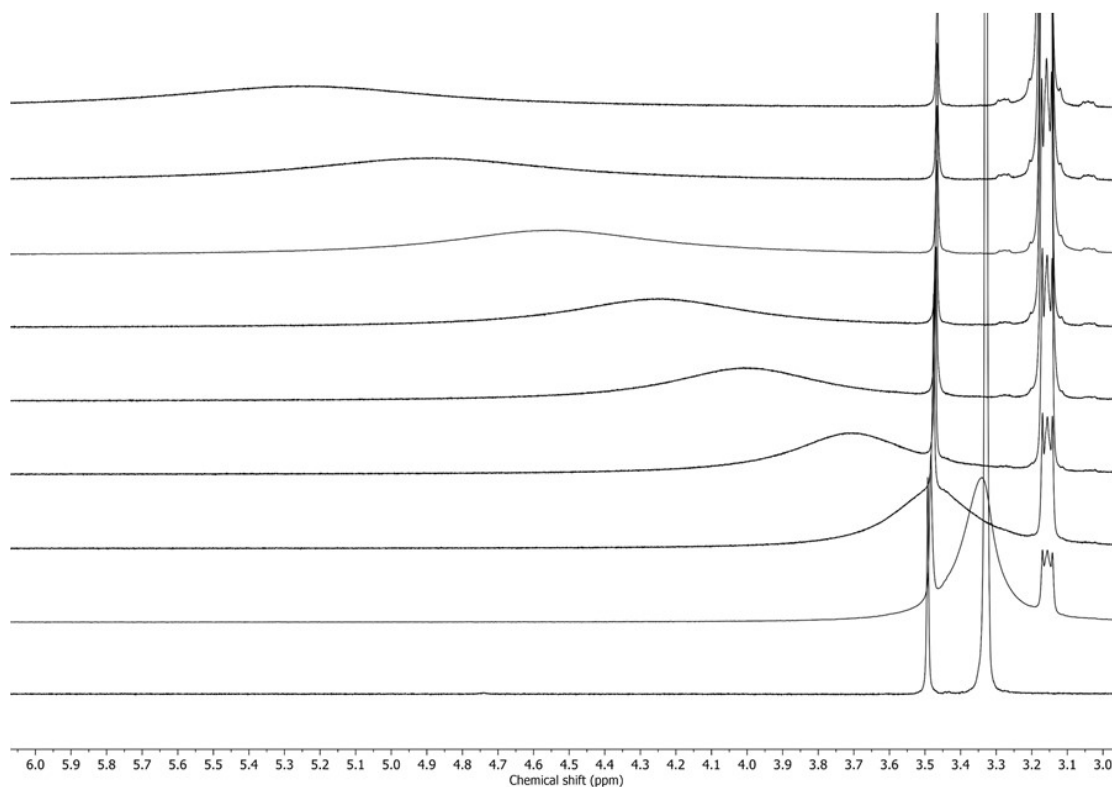

**Figure S19.**  $^1\text{H}$  NMR spectra observing the titration of  $\text{CH}_3\text{COO}^-$  into  $\text{NiL}^{3,3'-\text{S}}$  **(a)** in the aromatic region, where  $\text{N}_a\text{-H}$  starts from 9.74 ppm and  $\text{N}_b\text{-H}$  starts from 9.24 ppm. **(b)** following the water signal beginning at 3.32 ppm. From the bottom up: 0, 0.8, 1.6, 3, 5, 7, 10, 14, 20 mole equivalents of  $\text{CH}_3\text{COO}^-$  titrated.

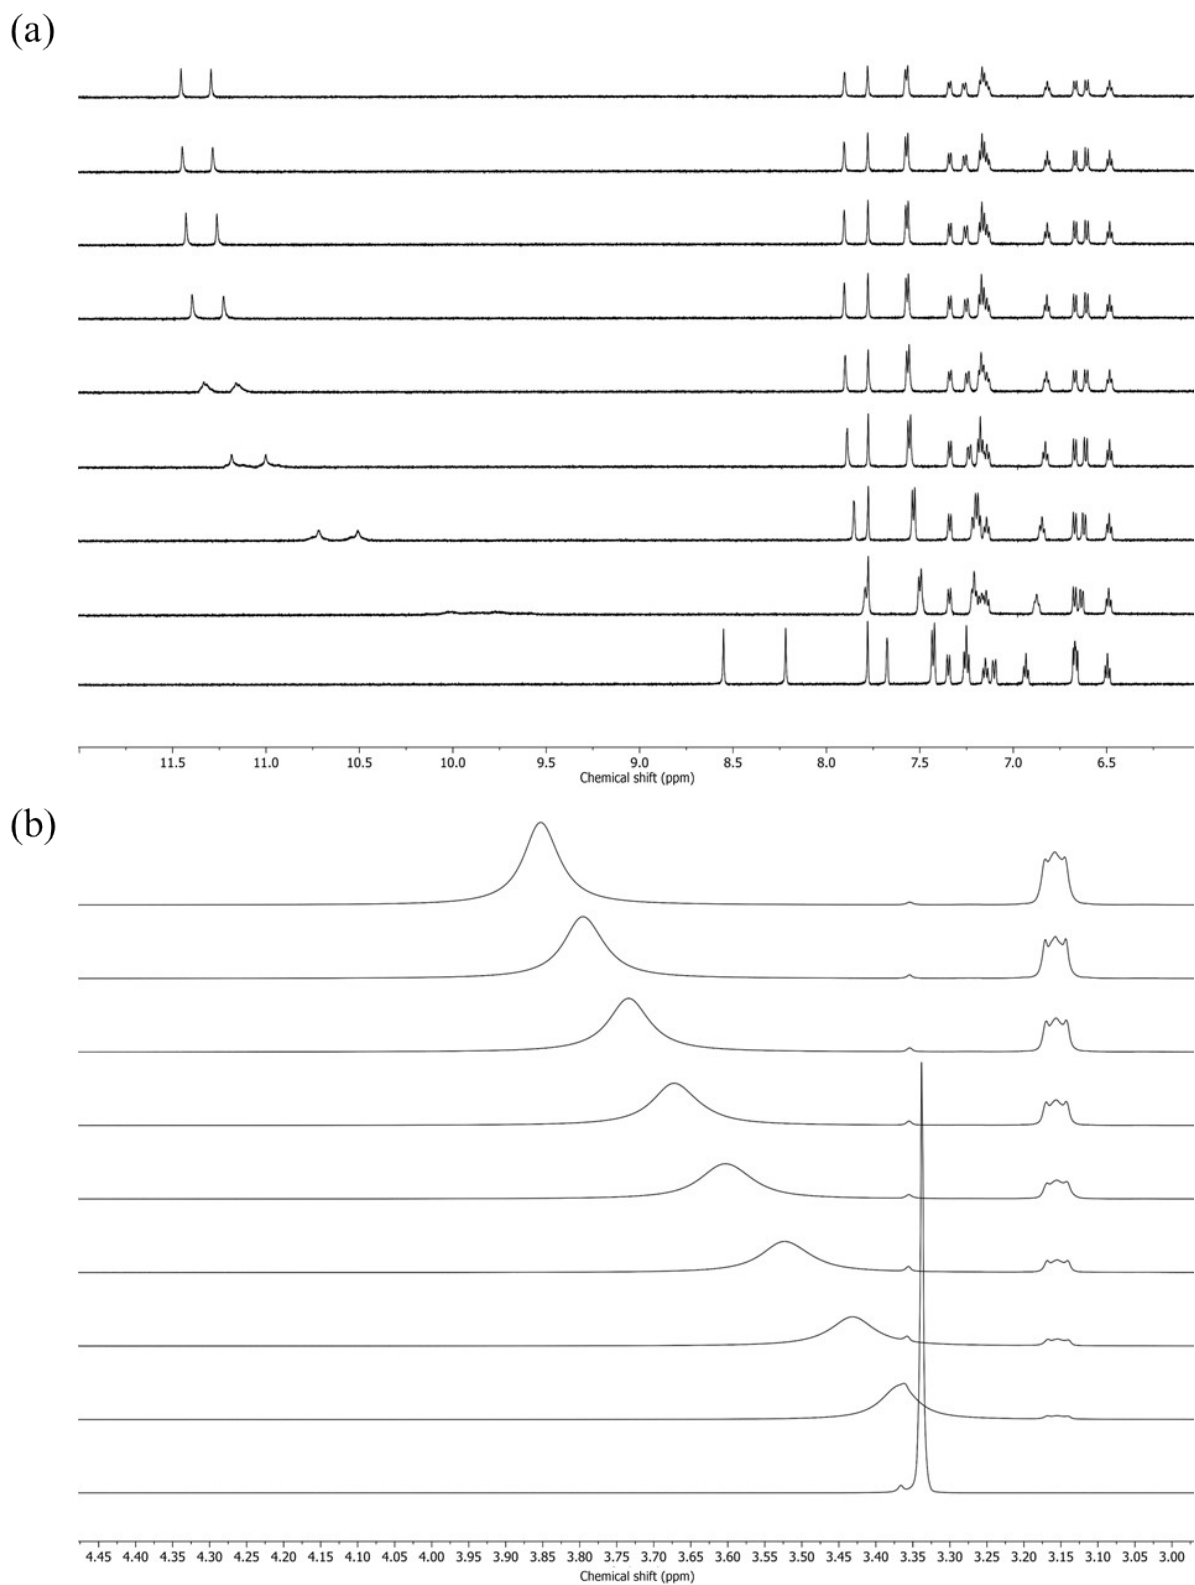

**Figure S20.**  $^1\text{H}$  NMR spectra observing the titration of  $\text{CH}_3\text{COO}^-$  into  $\text{NiL}^{5-\text{O}}$  **(a)** in the aromatic region, where  $\text{N}_a\text{-H}$  starts from 8.55 ppm and  $\text{N}_b\text{-H}$  starts from 8.22 ppm. **(b)** following the water signal beginning at 3.32 ppm. From the bottom up: 0, 0.8, 1.6, 3, 5, 7, 10, 14, 20 mole equivalents of  $\text{CH}_3\text{COO}^-$  titrated.

## Job Plots

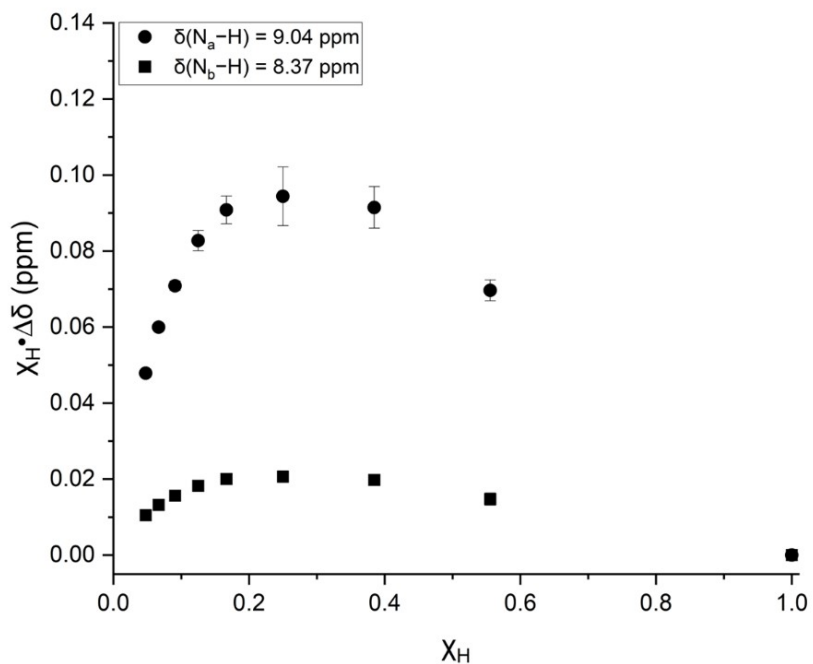

**Figure S21.** Job Plot of the titration of Cl<sup>-</sup> into NiL<sup>3,3'-O</sup> following the downfield shift of the urea protons in the <sup>1</sup>H NMR spectra.

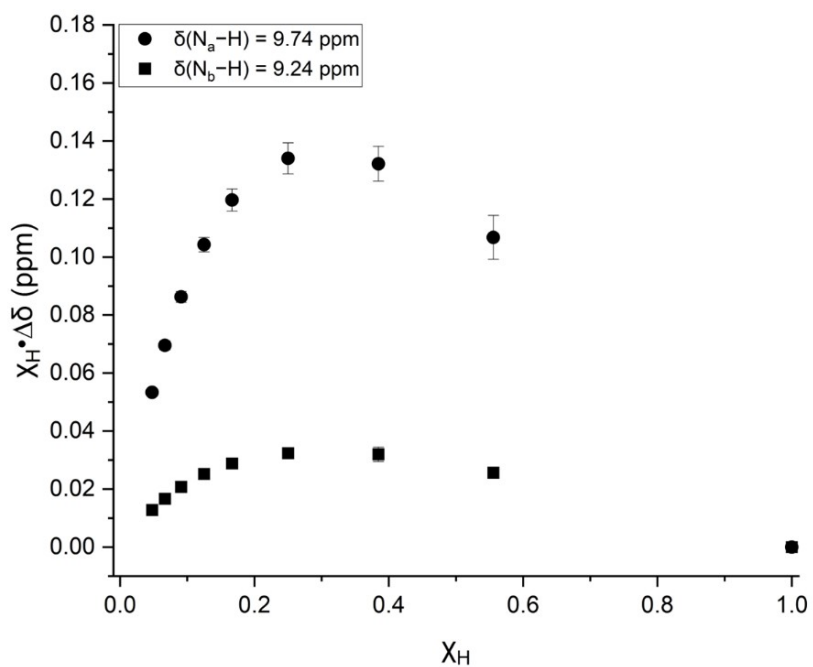

**Figure S22.** Job Plot of the titration of Cl<sup>-</sup> into NiL<sup>3,3'-S</sup> following the downfield shift of the thiourea protons in the <sup>1</sup>H NMR spectra.

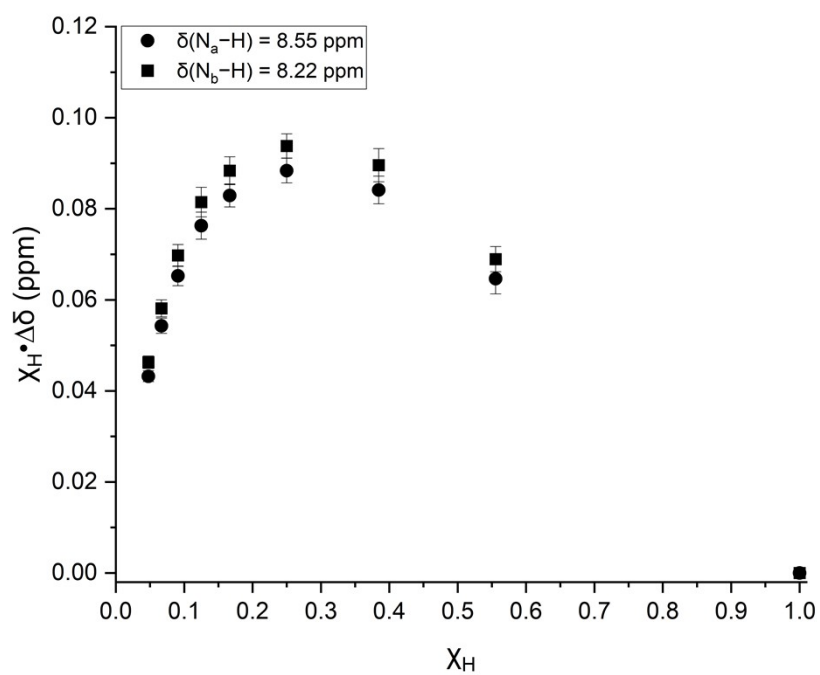

**Figure S23.** Job Plot of the titration of  $\text{Cl}^-$  into  $\text{NiL}^{5-0}$  following the downfield shift of the urea protons in the  $^1\text{H}$  NMR spectra.

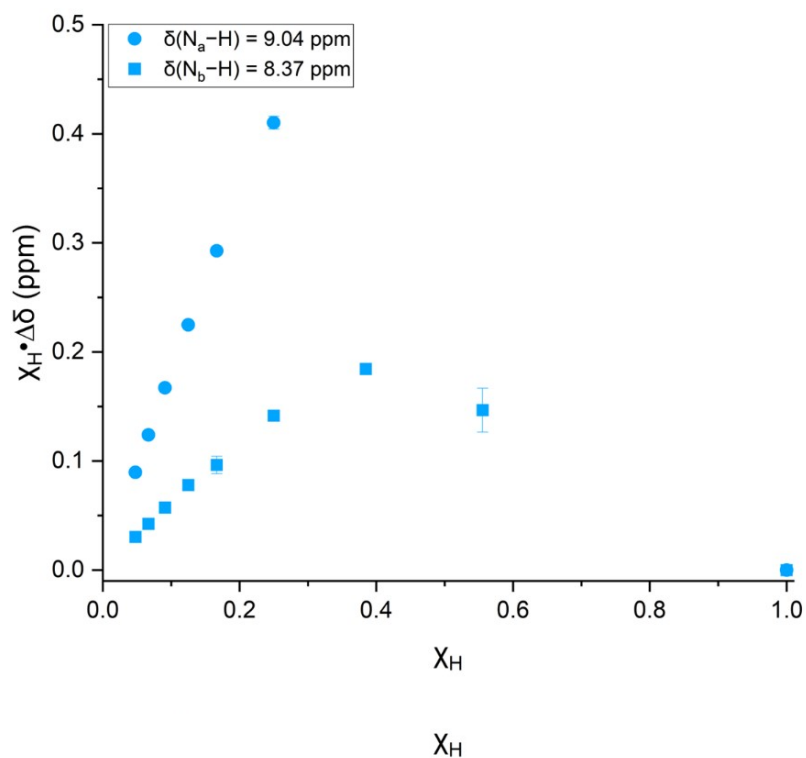

**Figure S24.** Job Plot of the titration of  $\text{H}_2\text{PO}_4^-$  into  $\text{NiL}^{3,3'-\text{O}}$  following the downfield shift of the urea

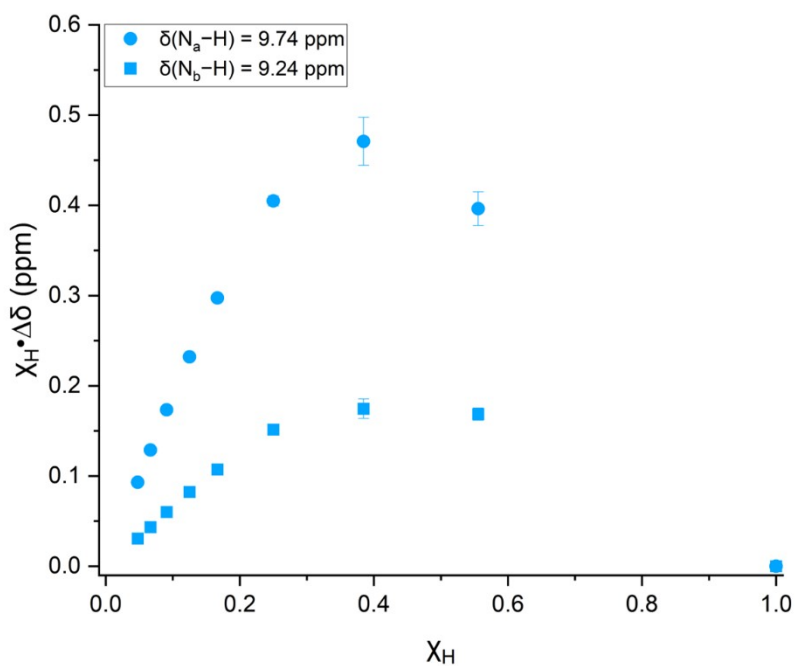

protons in the  $^1\text{H}$  NMR spectra.

**Figure S25.** Job Plot of the titration of  $\text{H}_2\text{PO}_4^-$  into  $\text{NiL}^{3,3'-\text{S}}$  following the downfield shift of the thiourea protons in the  $^1\text{H}$  NMR spectra.

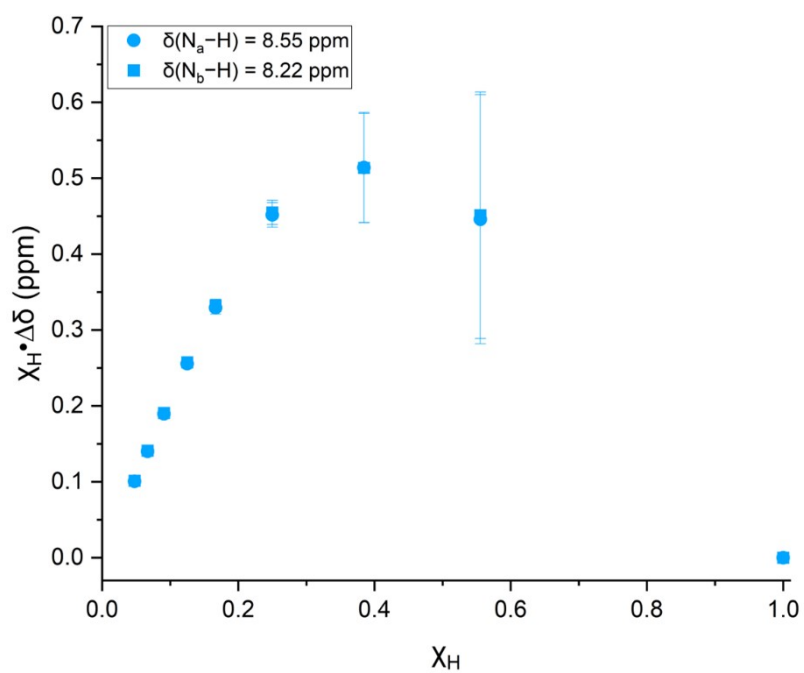

**Figure S26.** Job Plot of the titration of  $\text{H}_2\text{PO}_4^-$  into  $\text{NiL}^{5-0}$  following the downfield shift of the urea protons in the  $^1\text{H}$  NMR spectra.

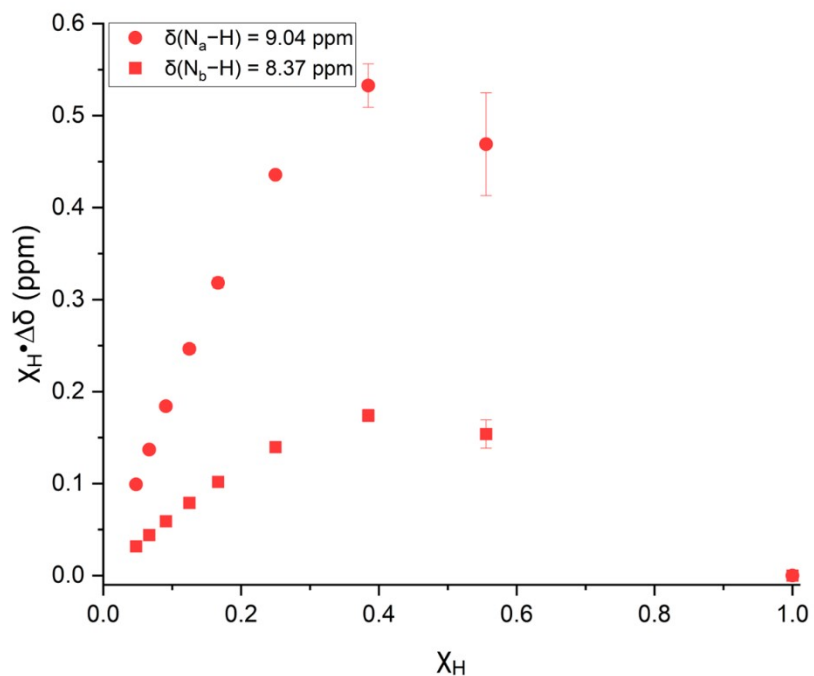

**Figure S27.** Job Plot of the titration of  $\text{CH}_3\text{COO}^-$  into  $\text{NiL}^{3,3'-0}$  following the downfield shift of the urea protons in the  $^1\text{H}$  NMR spectra.



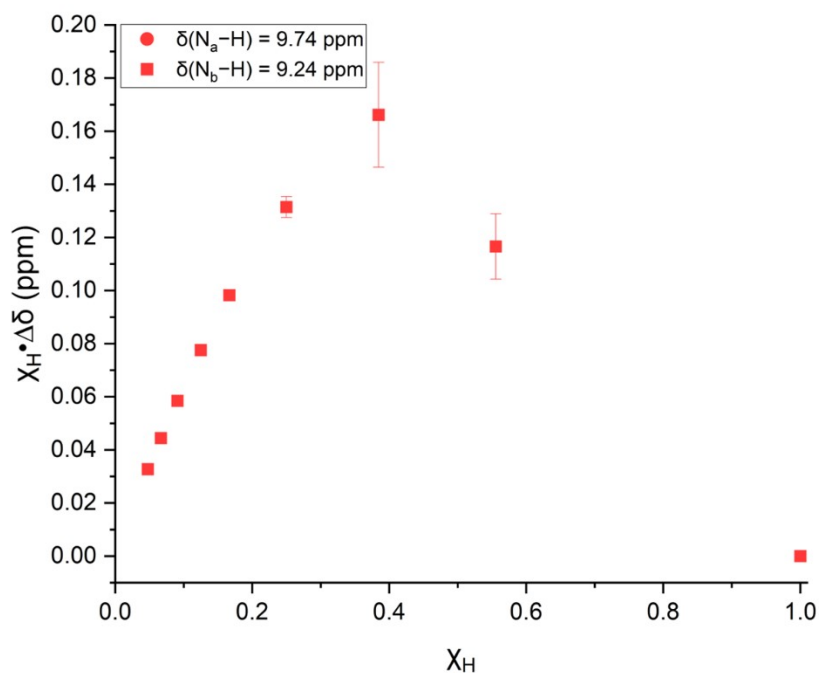

**Figure S28.** Job Plot of the titration of  $\text{CH}_3\text{COO}^-$  into  $\text{NiL}^{3,3'-S}$  following the downfield shift of the thiourea protons in the  $^1\text{H}$  NMR spectra.

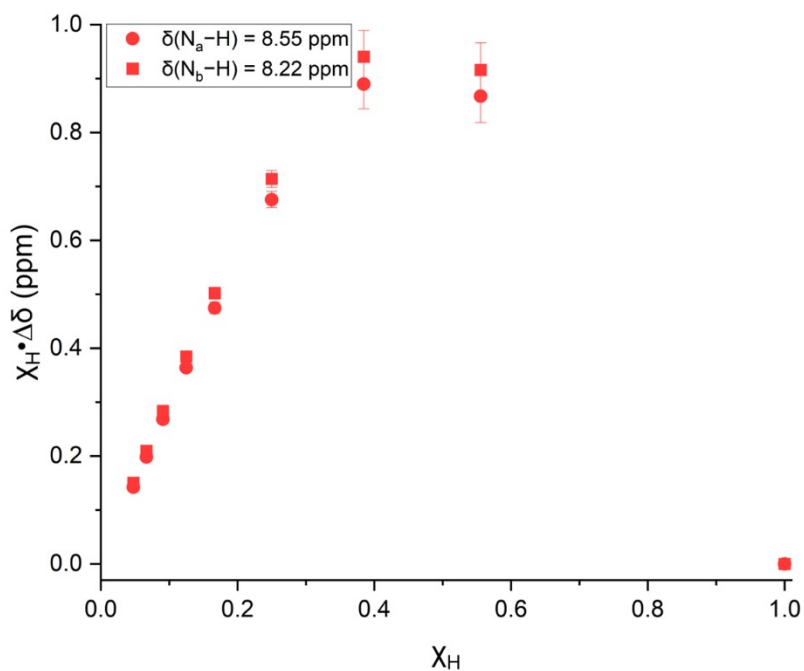

**Figure S29.** Job Plot of the titration of  $\text{CH}_3\text{COO}^-$  into  $\text{NiL}^{3,3'-S}$  following the downfield shift of the thiourea protons in the  $^1\text{H}$  NMR spectra.

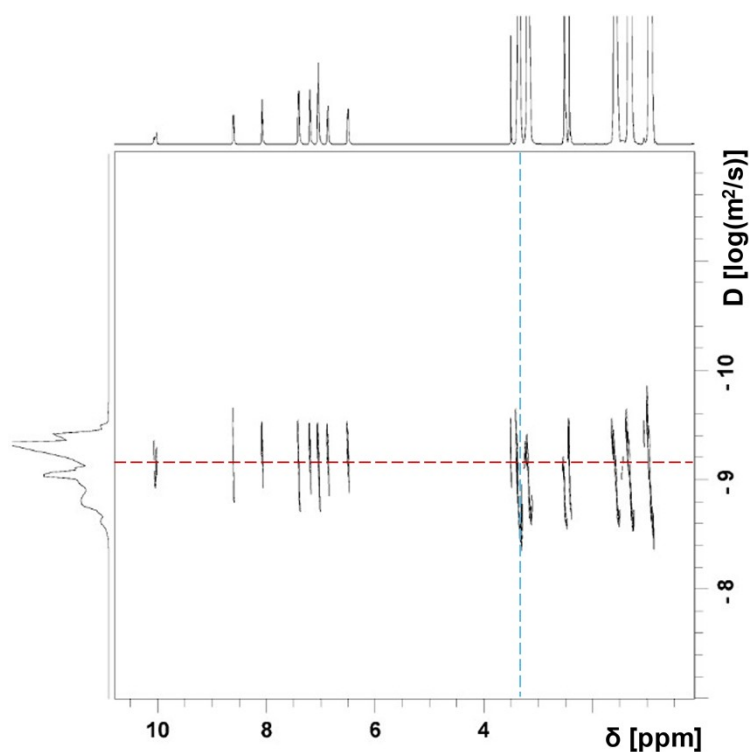

### Diffusion Ordered Spectroscopy (DOSY) Plots

**Figure S30.** DOSY spectrum of  $\text{NiL}^{3,3'-\text{O}}$  in the presence of 20 mole equivalents of  $\text{Cl}^-$ . The dashed red line indicates the diffusion signal for the nickel(II) complex and the dashed blue line traces the diffusion signal for  $\text{H}_2\text{O}$ .

**Figure S31.** DOSY spectrum of  $\text{NiL}^{3,3'-\text{S}}$  in the presence of 20 mole equivalents of  $\text{Cl}^-$ . The dashed red line indicates the diffusion signal for the nickel(II) complex and the dashed blue line traces the diffusion signal for  $\text{H}_2\text{O}$ .

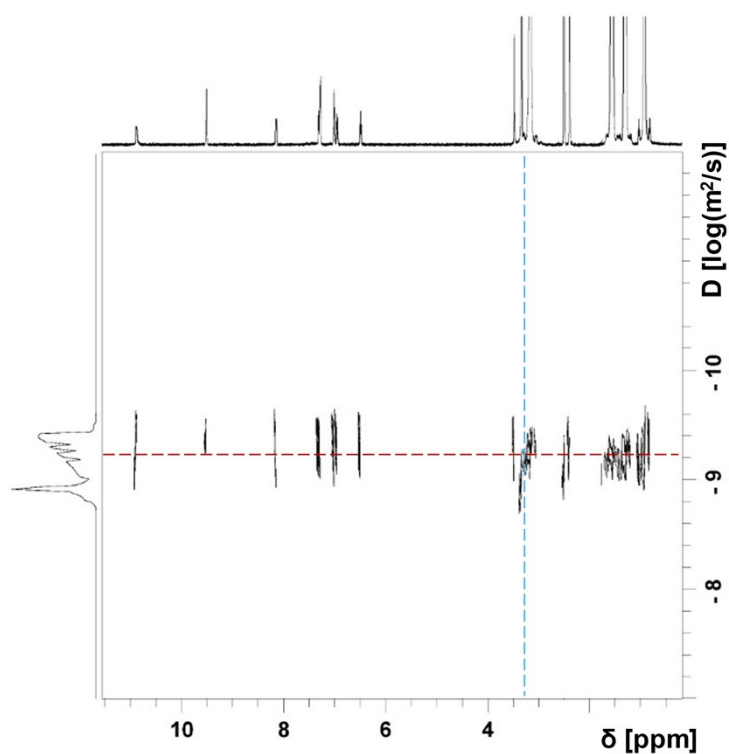

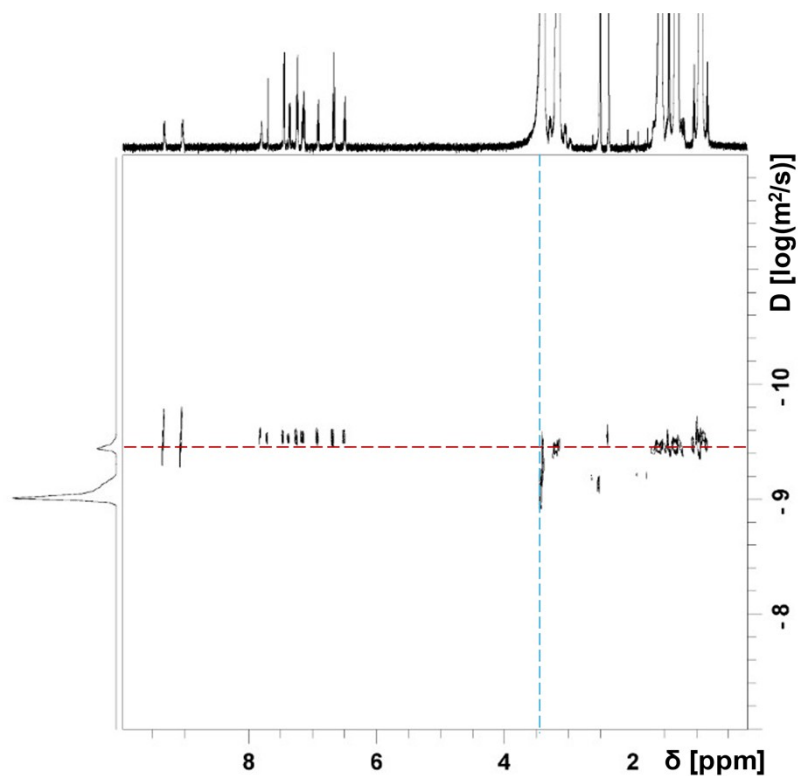

**Figure S32.** DOSY spectrum of  $\text{NiL}^{5-0}$  in the presence of 20 mole equivalents of  $\text{Cl}^-$ . The dashed red line indicates the diffusion signal for the nickel(II) complex and the dashed blue line traces the

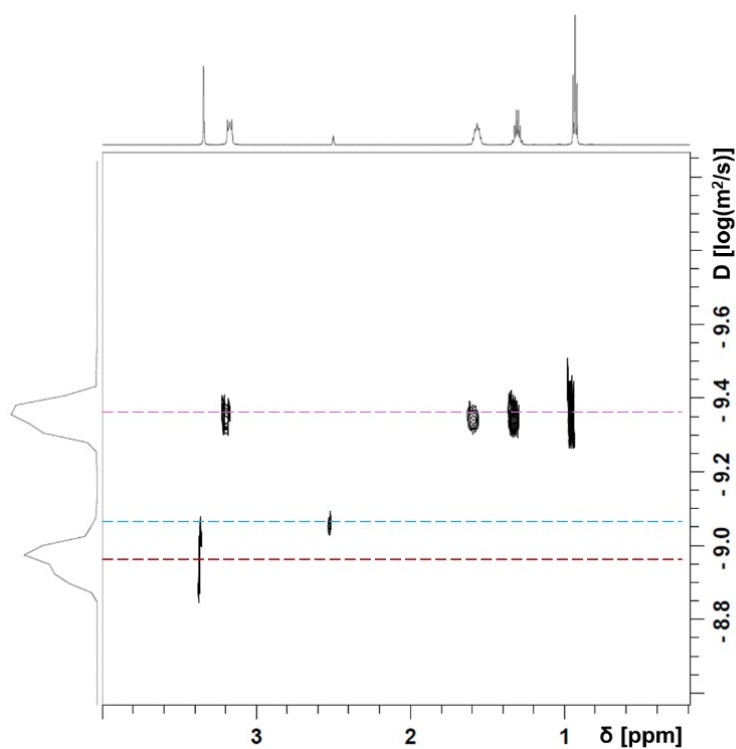

diffusion signal for  $\text{H}_2\text{O}$ .

**Figure S33.** DOSY spectrum of TBACl (250  $\mu\text{L}$ ) in  $\text{DMSO-}d_6$  (500  $\mu\text{L}$ ). The diffusion signals of  $\text{H}_2\text{O}$  (red),  $\text{DMSO-}d_6$  (blue), and the tetrabutylammonium cation (pink) are indicated by dashed lines.

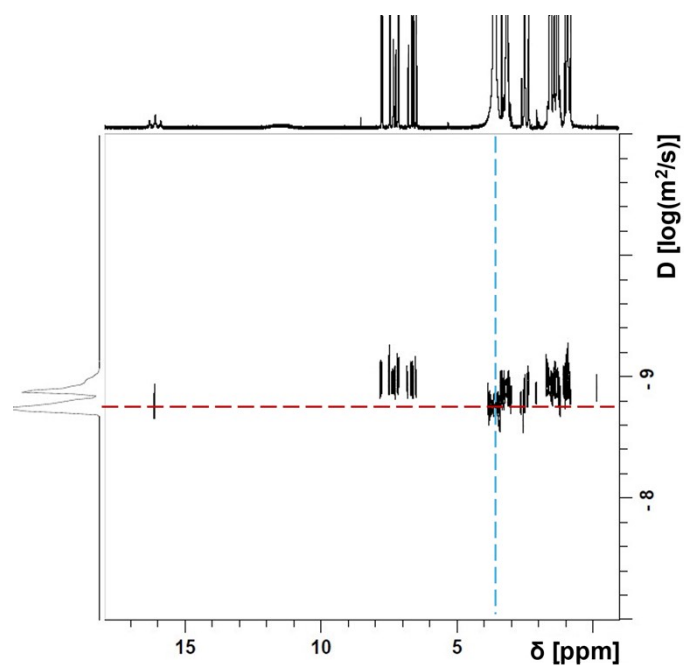

**Figure S34.** DOSY spectrum of  $\text{NiL}^{5-0}$  in the presence of 12 mole equivalents of  $\text{F}^-$ . The dashed red line indicates the diffusion signal for  $\text{HF}_2^-$  and the dashed blue line traces the diffusion signal for  $\text{H}_2\text{O}$ .

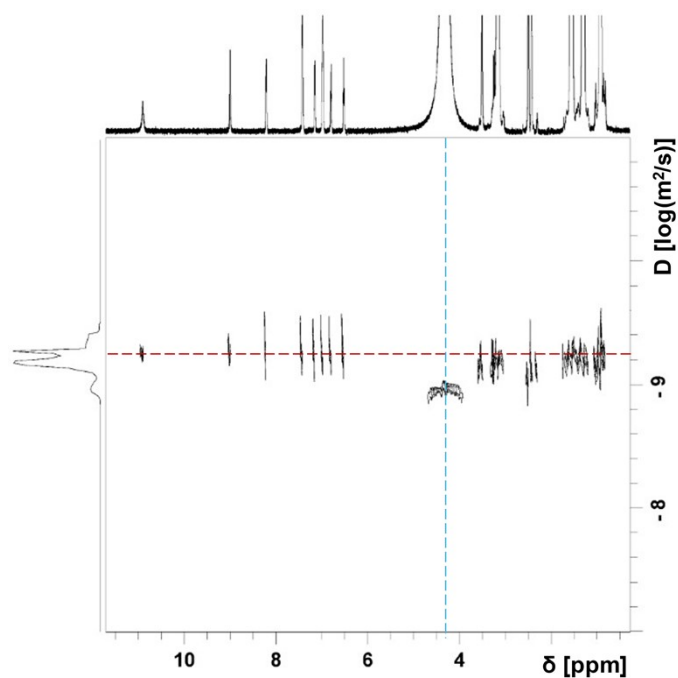

**Figure S35.** DOSY spectrum of  $\text{NiL}^{3,3'-\text{O}}$  in the presence of 20 mole equivalents of  $\text{H}_2\text{PO}_4^-$ . The dashed red line indicates the diffusion signal for the nickel(II) complex and the dashed blue line traces the diffusion signal for  $\text{H}_2\text{O}$ .

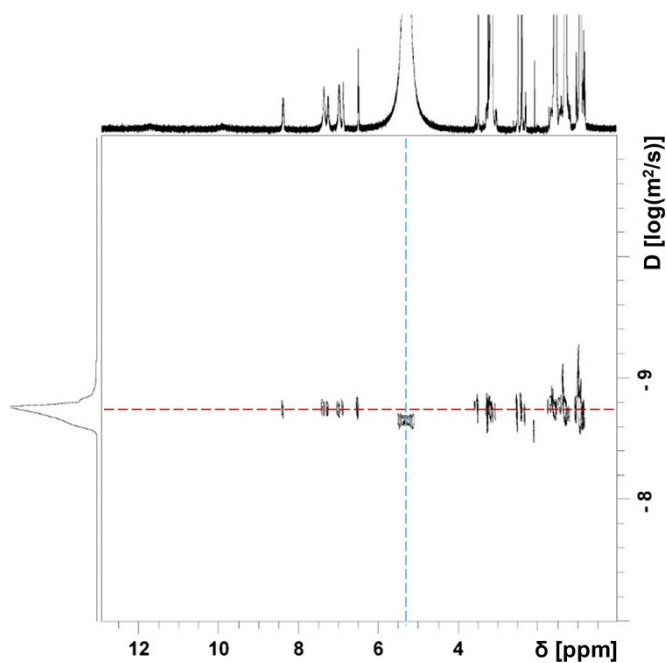

**Figure S36.** DOSY spectrum of  $\text{NiL}^{3,3'-\text{S}}$  in the presence of 20 mole equivalents of  $\text{H}_2\text{PO}_4^-$ . The dashed red line indicates the diffusion signal for the nickel(II) complex and the dashed blue line traces the diffusion signal for  $\text{H}_2\text{O}$ .

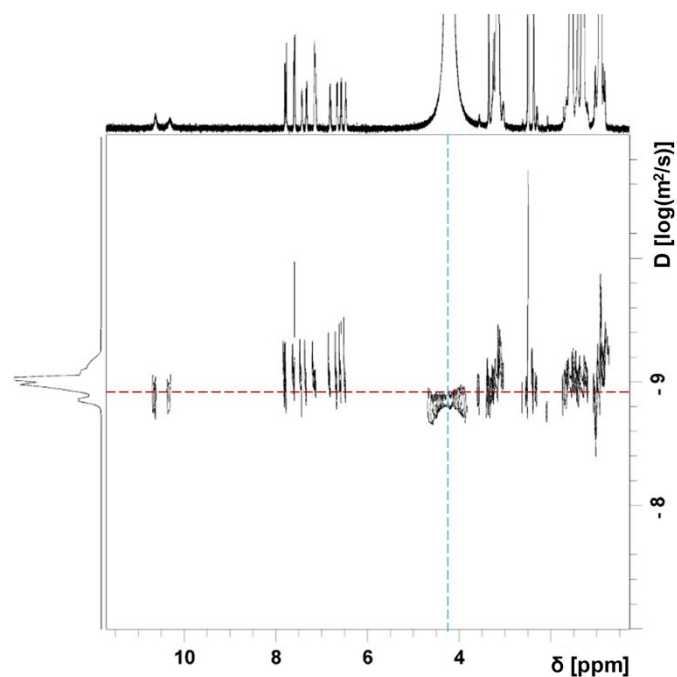

**Figure S37.** DOSY spectrum of  $\text{NiL}^{5-0}$  in the presence of 20 mole equivalents of  $\text{H}_2\text{PO}_4^-$ . The dashed red line indicates the diffusion signal for the nickel(II) complex and the dashed blue line traces the diffusion signal for  $\text{H}_2\text{O}$ .

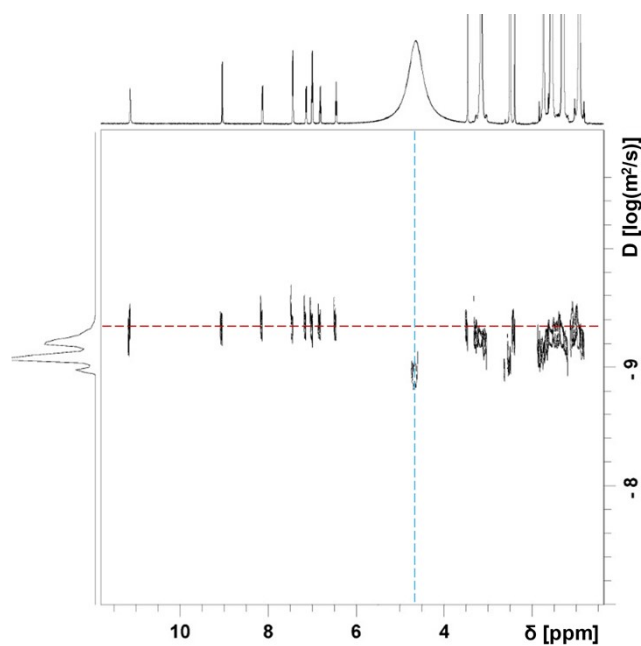

**Figure S38.** DOSY spectrum of  $\text{NiL}^{3,3'-0}$  in the presence of 20 mole equivalents of  $\text{CH}_3\text{COO}^-$ . The dashed red line indicates the diffusion signal for the nickel(II) complex and the dashed blue line traces the diffusion signal for  $\text{H}_2\text{O}$ .

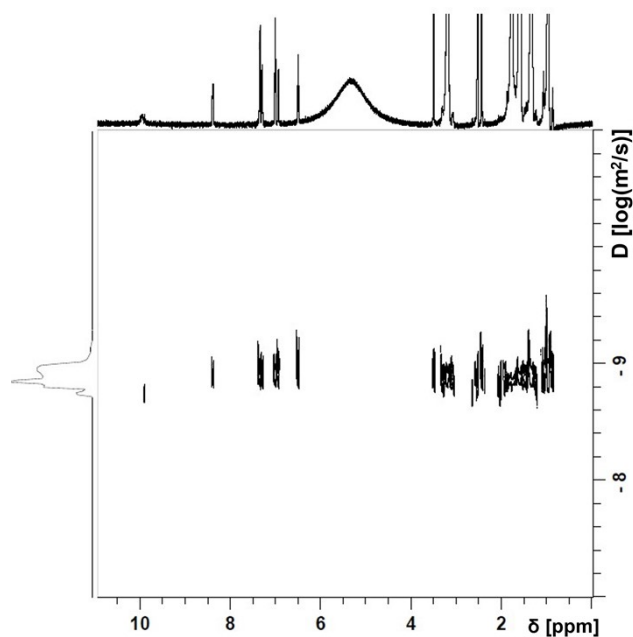

**Figure S39.** DOSY spectrum of  $\text{NiL}^{3,3'-\text{S}}$  in the presence of 20 mole equivalents of  $\text{CH}_3\text{COO}^-$ .

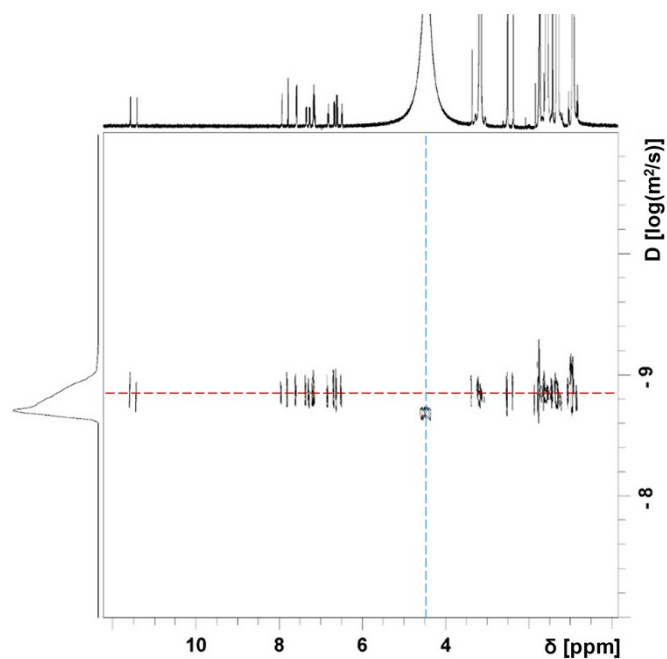

**Figure S40.** DOSY spectrum of  $\text{NiL}^{5-0}$  in the presence of 20 mole equivalents of  $\text{CH}_3\text{COO}^-$ . The dashed red line indicates the diffusion signal for the nickel(II) complex and the dashed blue line traces the diffusion signal for  $\text{H}_2\text{O}$ .

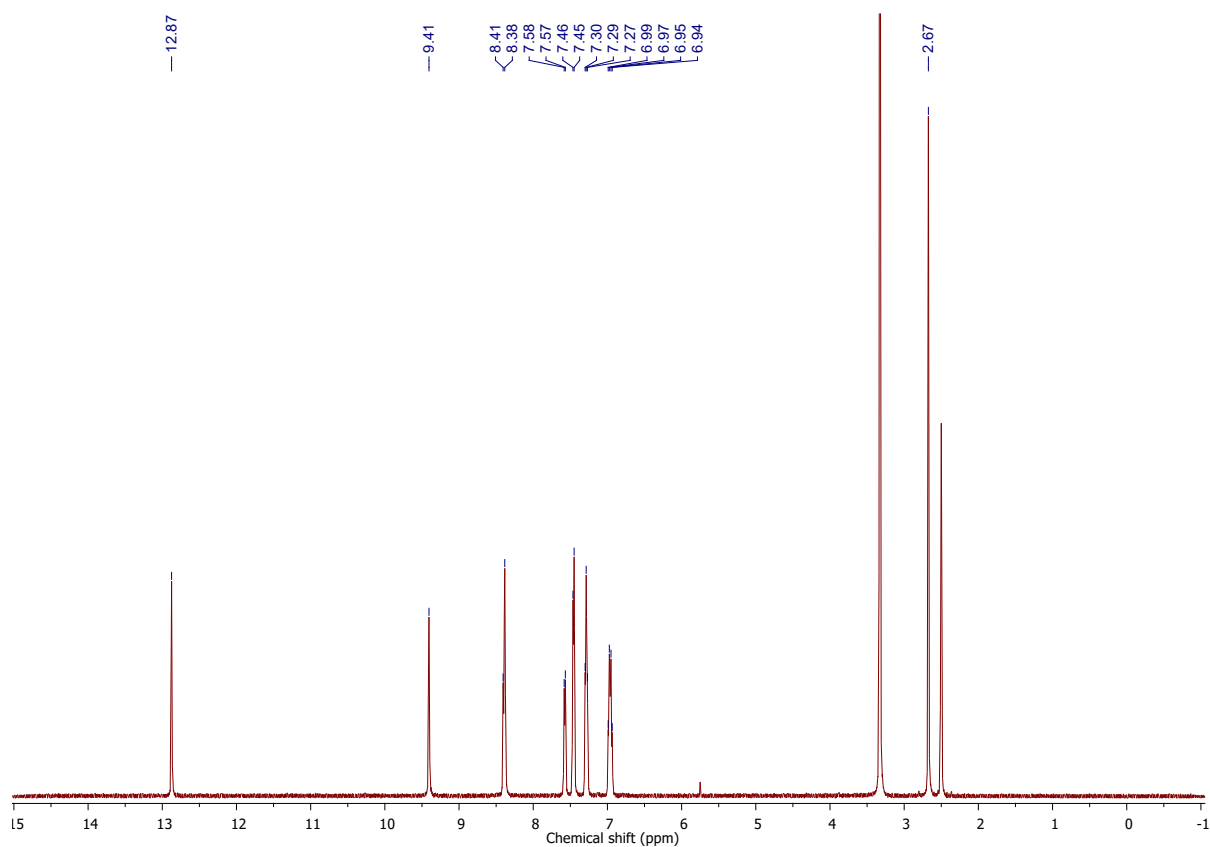

### Copies of NMR Spectra

Figure S41.  $^1\text{H}$  NMR ( $^1\text{H} = 498.557$  MHz, 298.1 K,  $\text{DMSO-}d_6$ ) spectrum of  $\text{HL}^3\text{-O}$ .



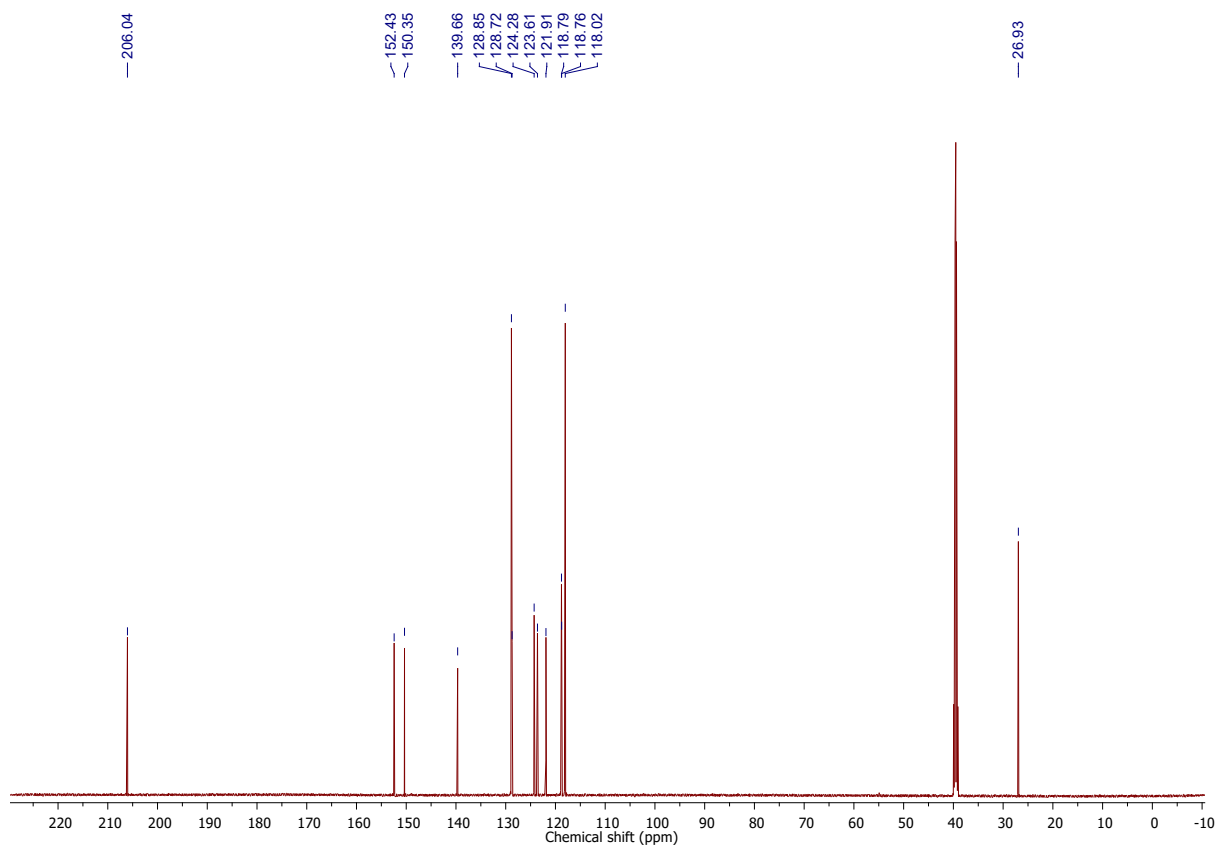

**Figure S42.**  $^{13}\text{C}$  NMR ( $^{13}\text{C}\{^1\text{H}\} = 150.919$  MHz, 298.0 K,  $\text{DMSO-}d_6$ ) spectrum of  $\text{HL}^{3-\text{O}}$ .

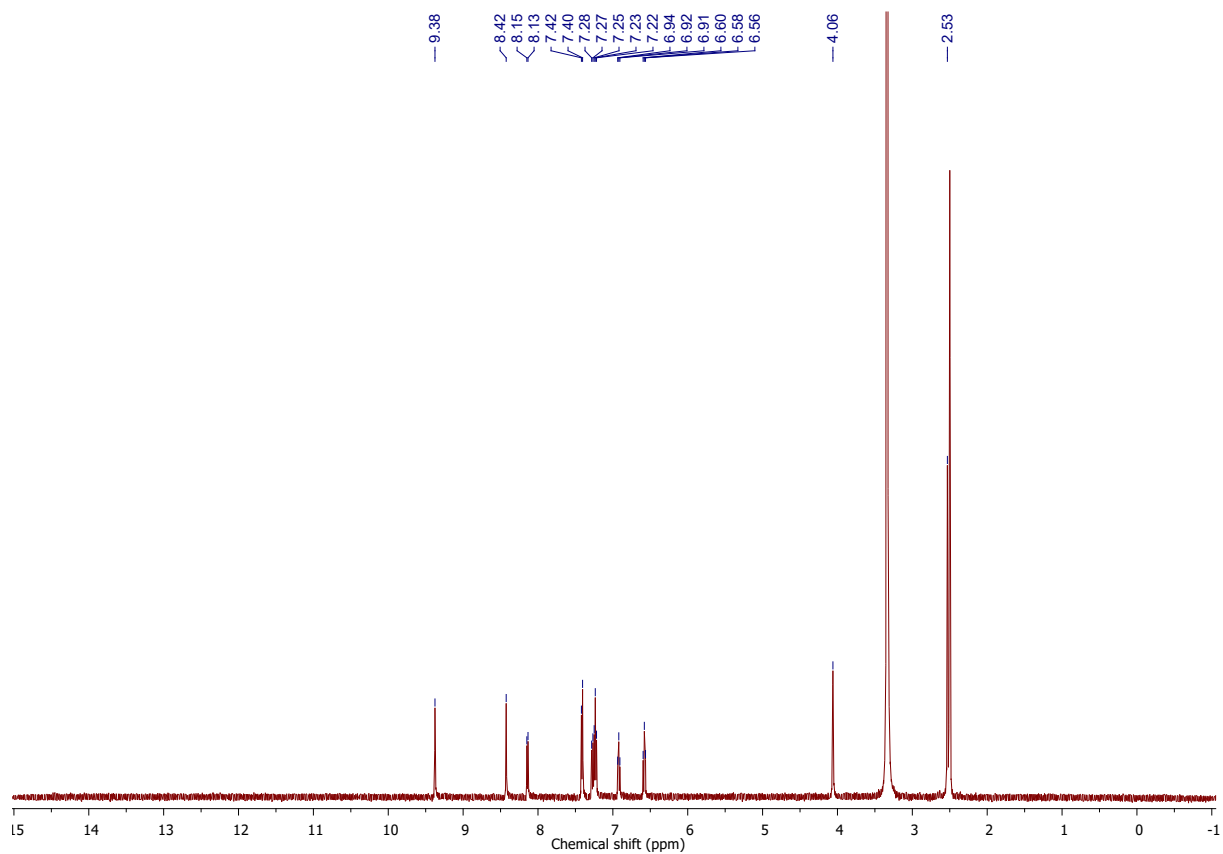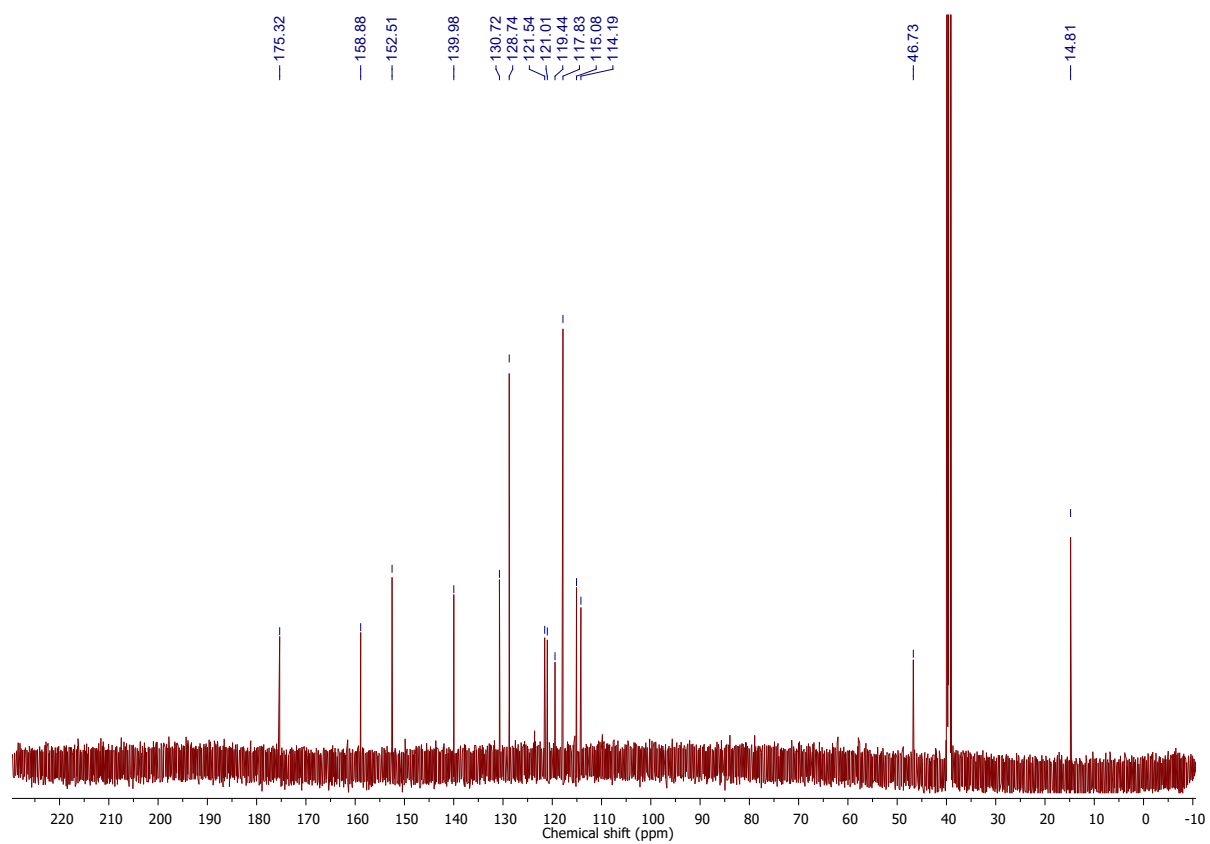

**Figure S43.**  $^1\text{H}$  NMR ( $^1\text{H}$  = 498.557 MHz, 298.1 K,  $\text{DMSO-}d_6$ ) spectrum of  $\text{H}_2\text{L}^{3,3'-\text{O}}$ .

**Figure S44.**  $^{13}\text{C}$  NMR ( $^{13}\text{C}\{^1\text{H}\}$  = 150.919 MHz, 298.0 K,  $\text{DMSO-}d_6$ ) spectrum of  $\text{H}_2\text{L}^{3,3'-\text{O}}$ .

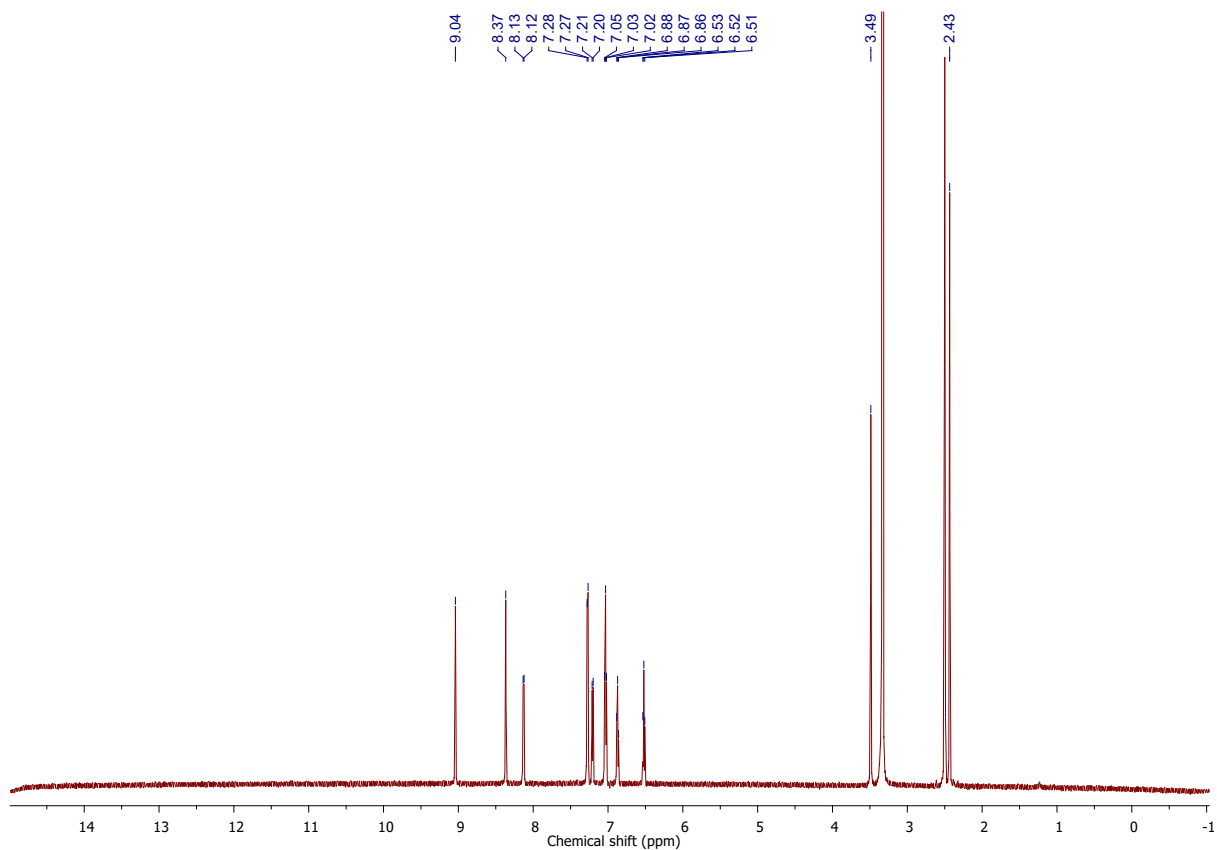

**Figure S45.**  $^1\text{H}$  NMR ( $^1\text{H}$  = 600.124 MHz, 298.0 K,  $\text{DMSO-}d_6$ ) spectrum of  $\text{NiL}^{3,3'-\text{O}}$ .

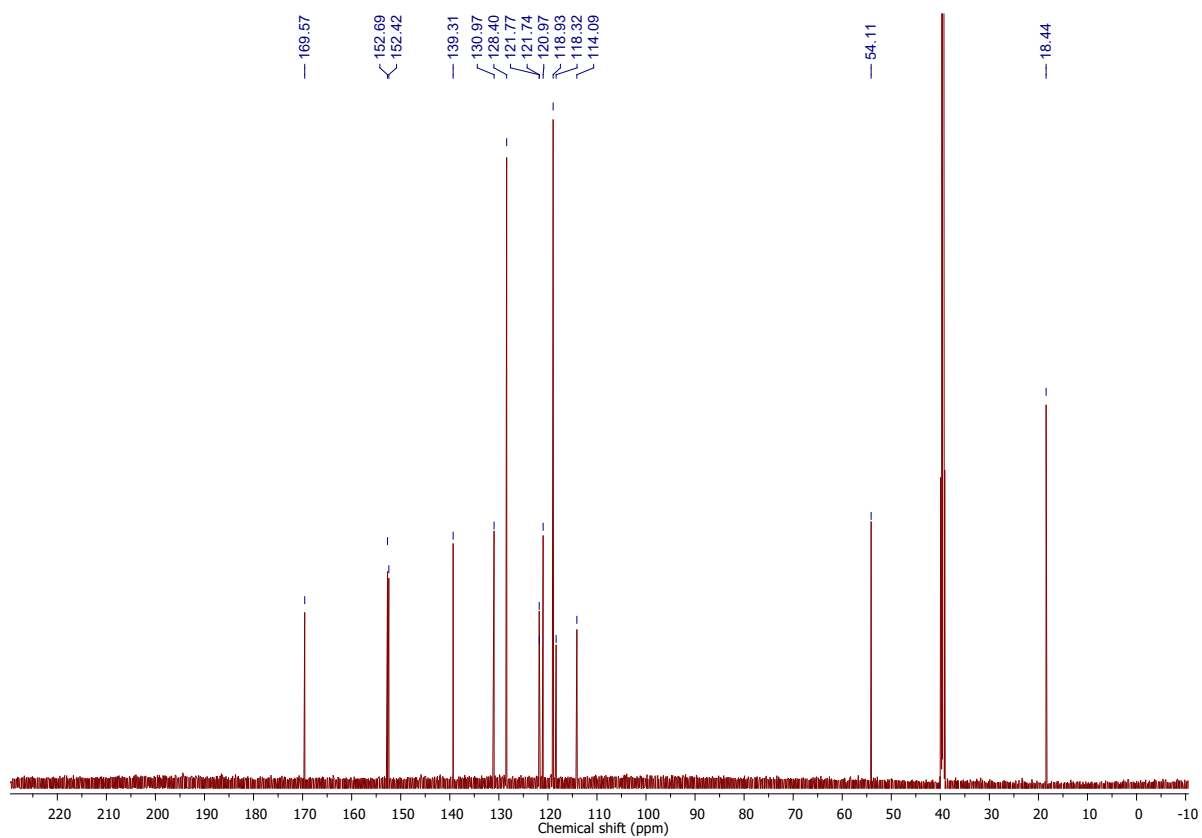

**Figure S46.**  $^{13}\text{C}$  NMR ( $^{13}\text{C}\{^1\text{H}\}$  = 150.919 MHz, 298.0 K,  $\text{DMSO-}d_6$ ) spectrum of  $\text{NiL}^{3,3'-\text{O}}$ .

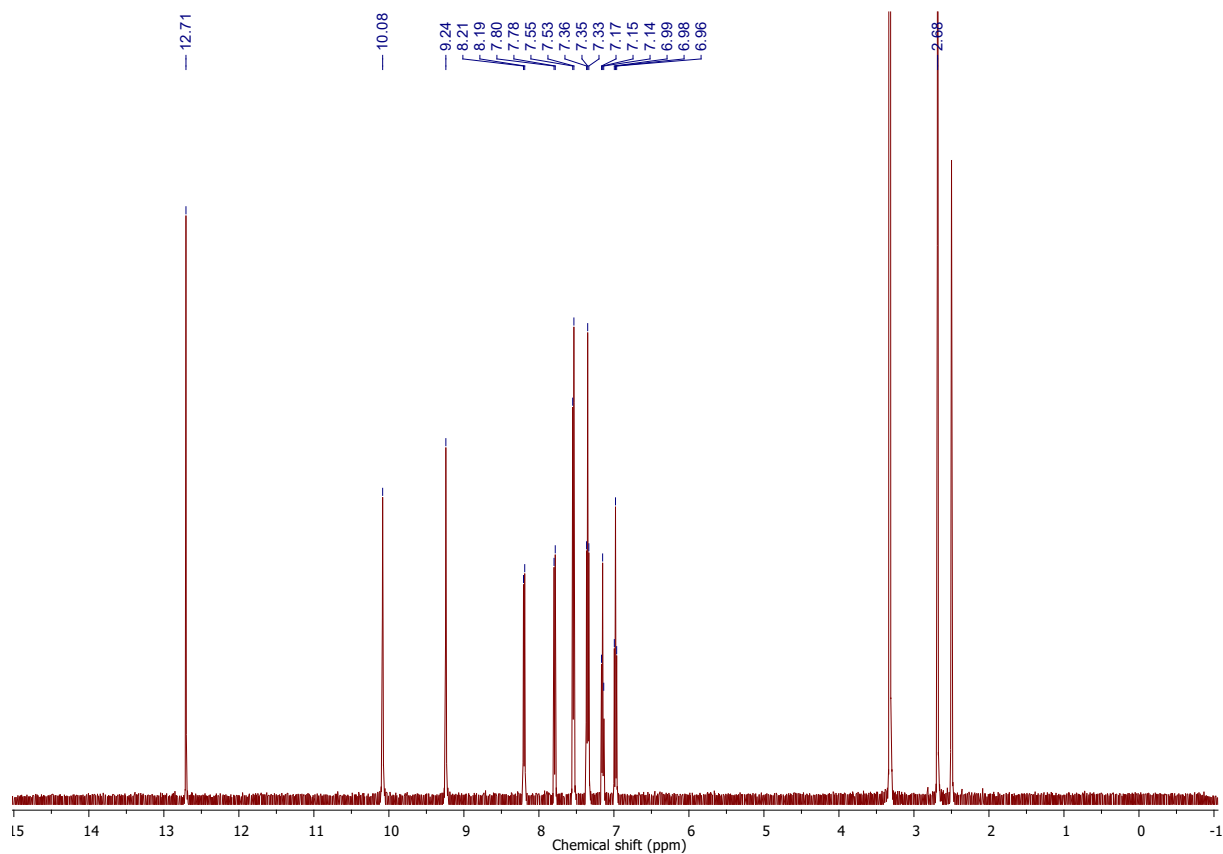

**Figure S47.**  $^1\text{H}$  NMR ( $^1\text{H} = 498.557$  MHz, 298.1 K,  $\text{DMSO-}d_6$ ) spectrum of  $\text{HL}^{3-\text{S}}$ .

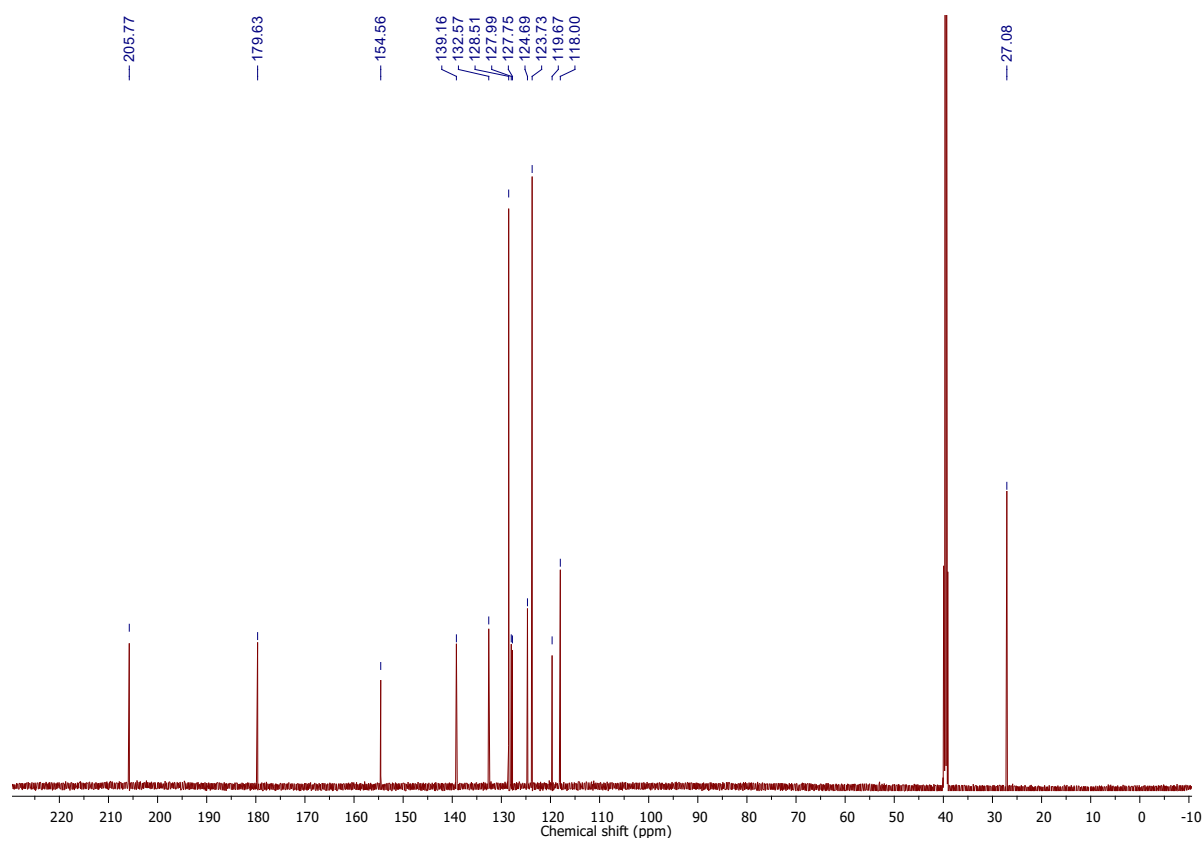

**Figure S48.**  $^{13}\text{C}$  NMR ( $^{13}\text{C}\{^1\text{H}\} = 150.919$  MHz, 298.0 K,  $\text{DMSO-}d_6$ ) spectrum of  $\text{HL}^{3-\text{S}}$ .

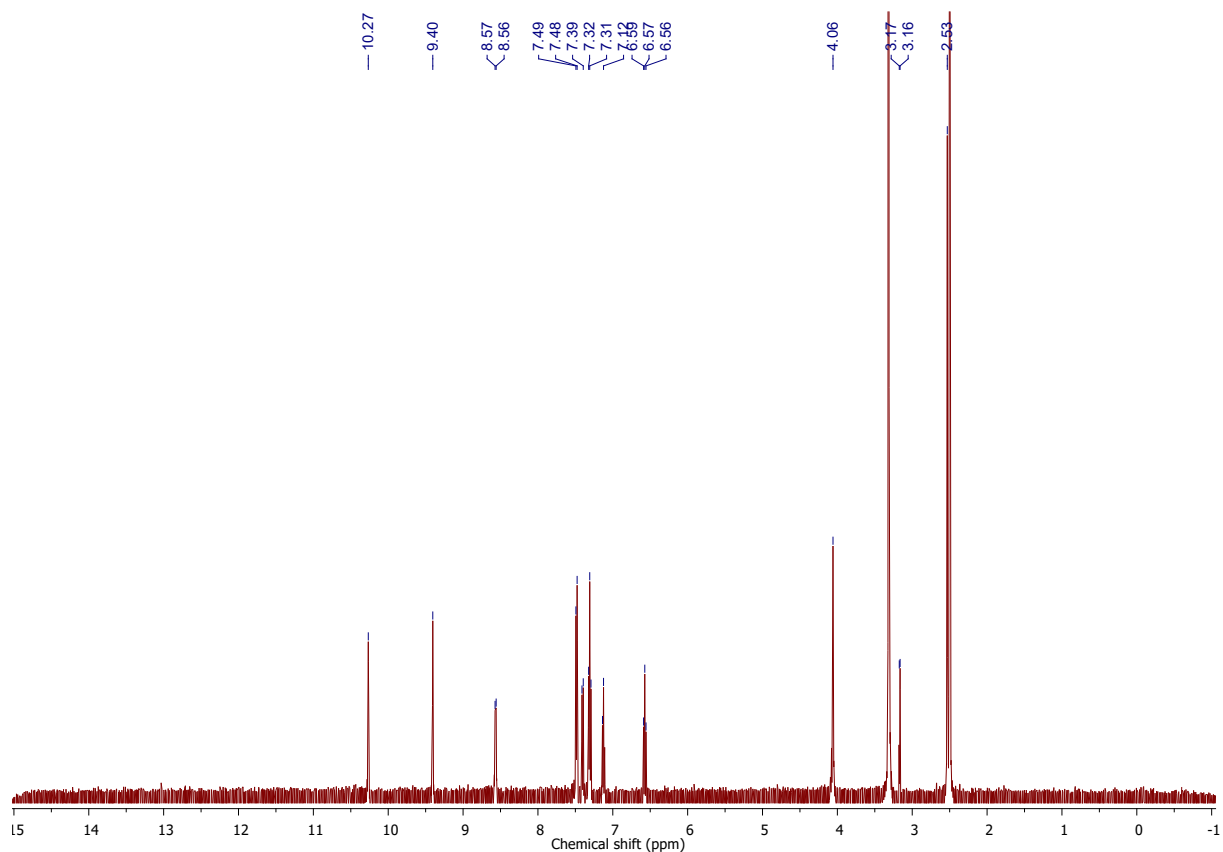

**Figure S49.**  $^1\text{H}$  NMR ( $^1\text{H} = 498.557$  MHz, 298.1 K,  $\text{DMSO-}d_6$ ) spectrum of  $\text{H}_2\text{L}^{3,3'-\text{S}}$ . A chemical shift present at 3.16 ppm (d,  $J = 5.5$  Hz) is assigned to residual methanol.<sup>15</sup>

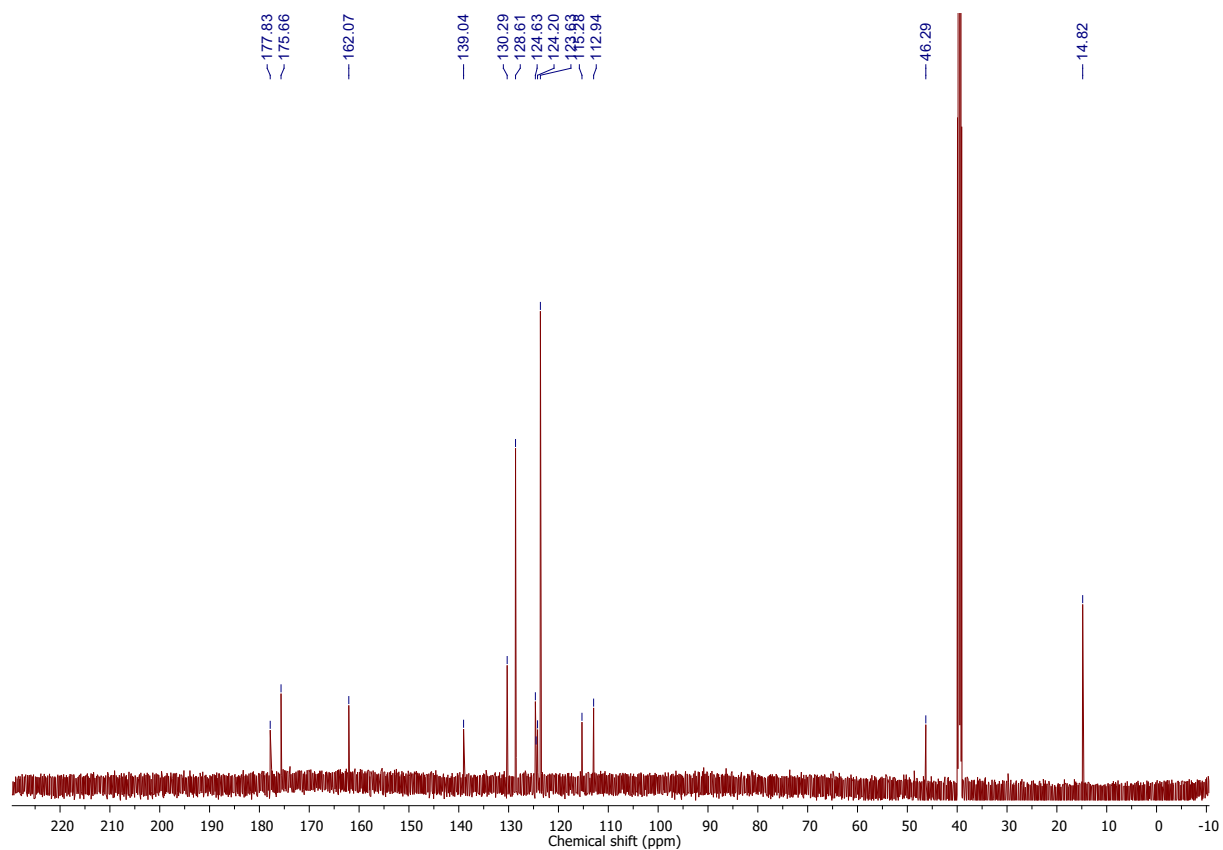

**Figure S50.**  $^{13}\text{C}$  NMR ( $^{13}\text{C}\{^1\text{H}\} = 150.919$  MHz, 298.0 K,  $\text{DMSO-}d_6$ ) spectrum of  $\text{H}_2\text{L}^{3,3'-\text{S}}$ .

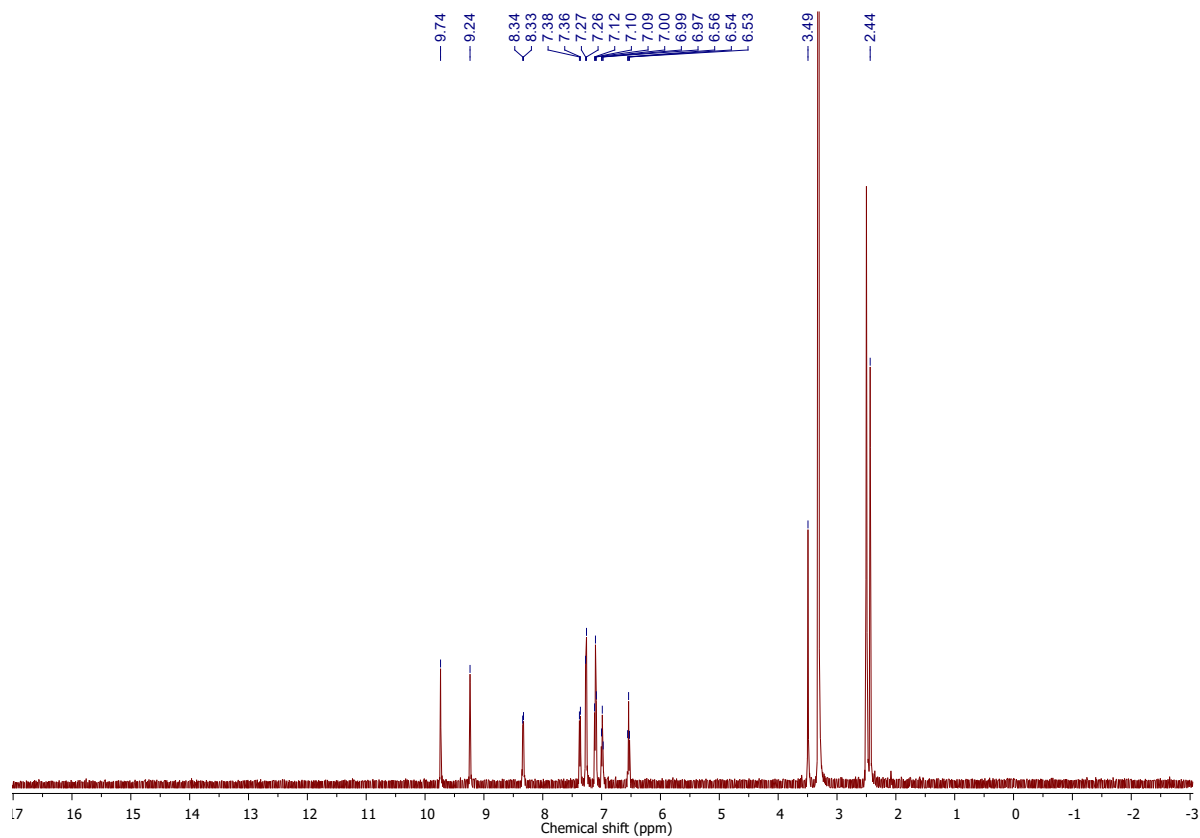

**Figure S51.**  $^1\text{H}$  NMR ( $^1\text{H} = 498.557$  MHz, 298.1 K,  $\text{DMSO-}d_6$ ) spectrum of  $\text{NiL}^{3,3'-\text{S}}$ .

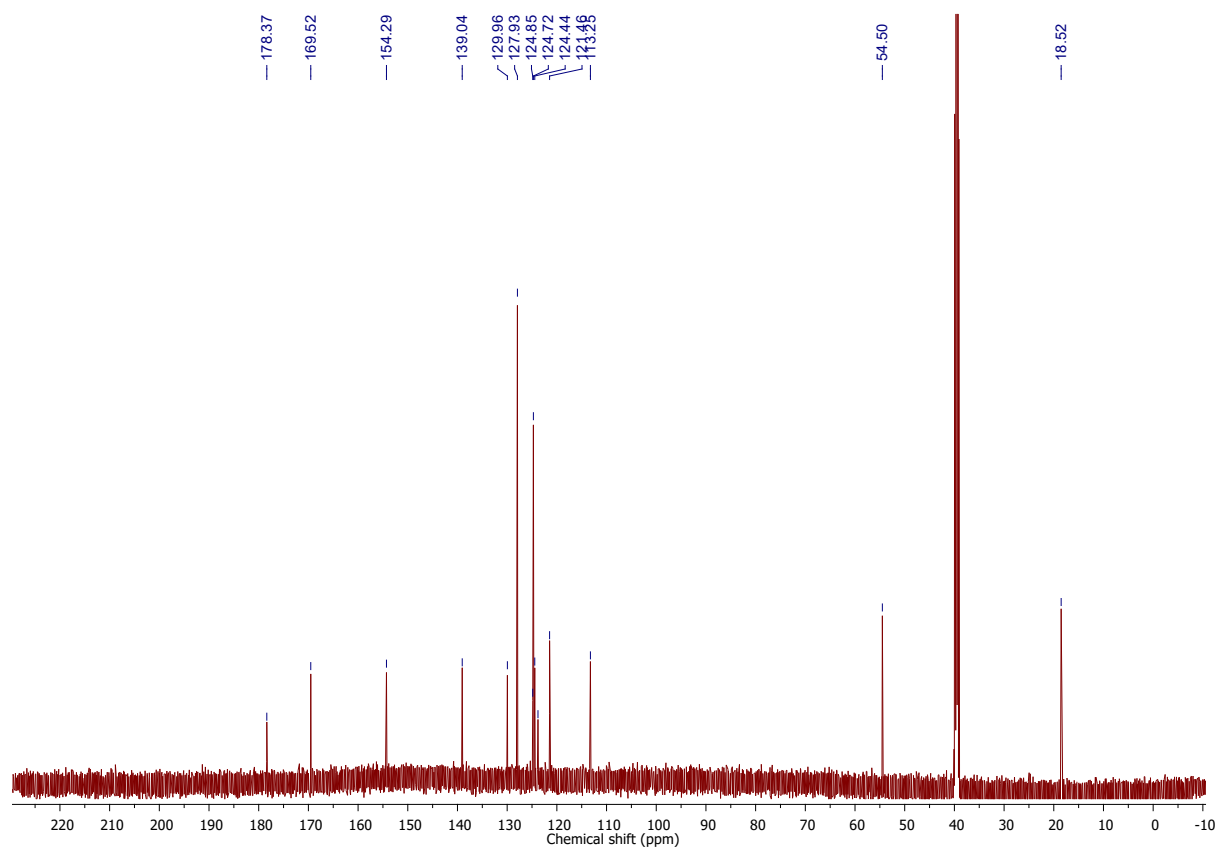

**Figure S52.**  $^{13}\text{C}$  NMR ( $^{13}\text{C}\{^1\text{H}\} = 150.919$  MHz, 298.0 K,  $\text{DMSO-}d_6$ ) spectrum of  $\text{NiL}^{3,3'-\text{S}}$ .

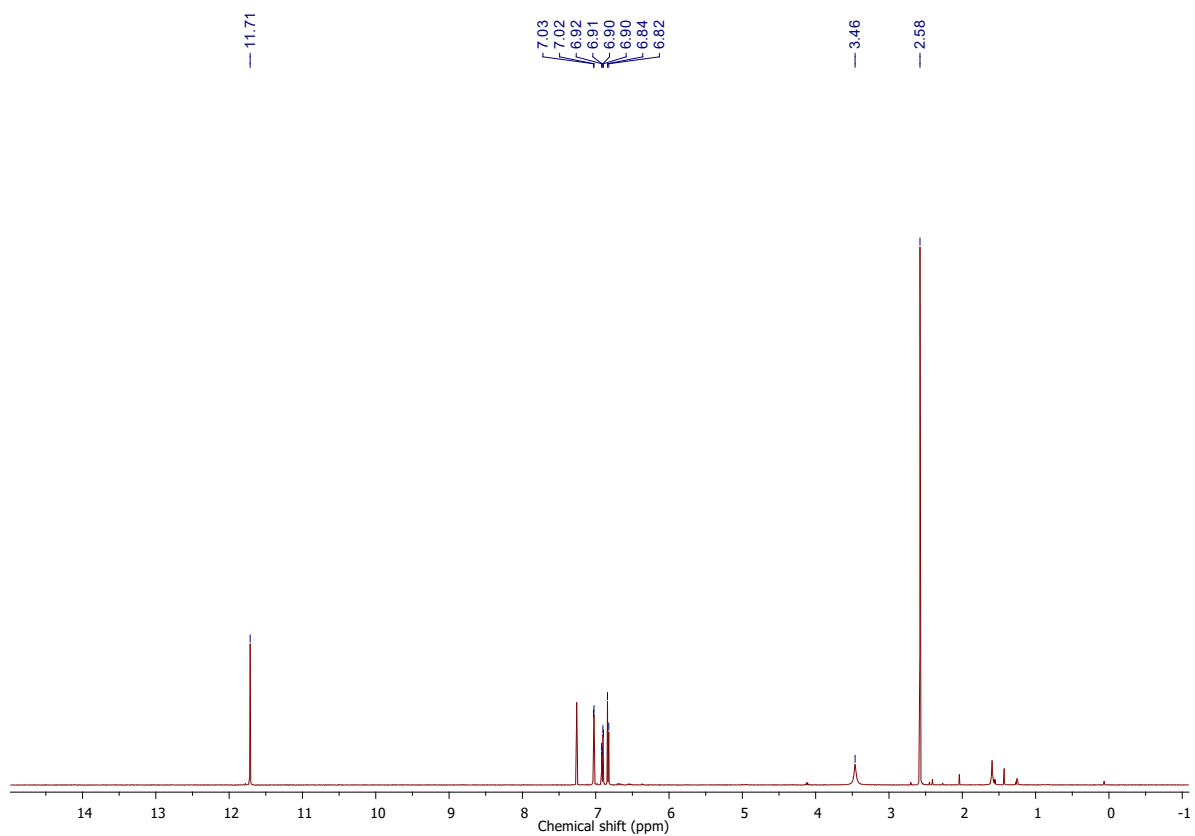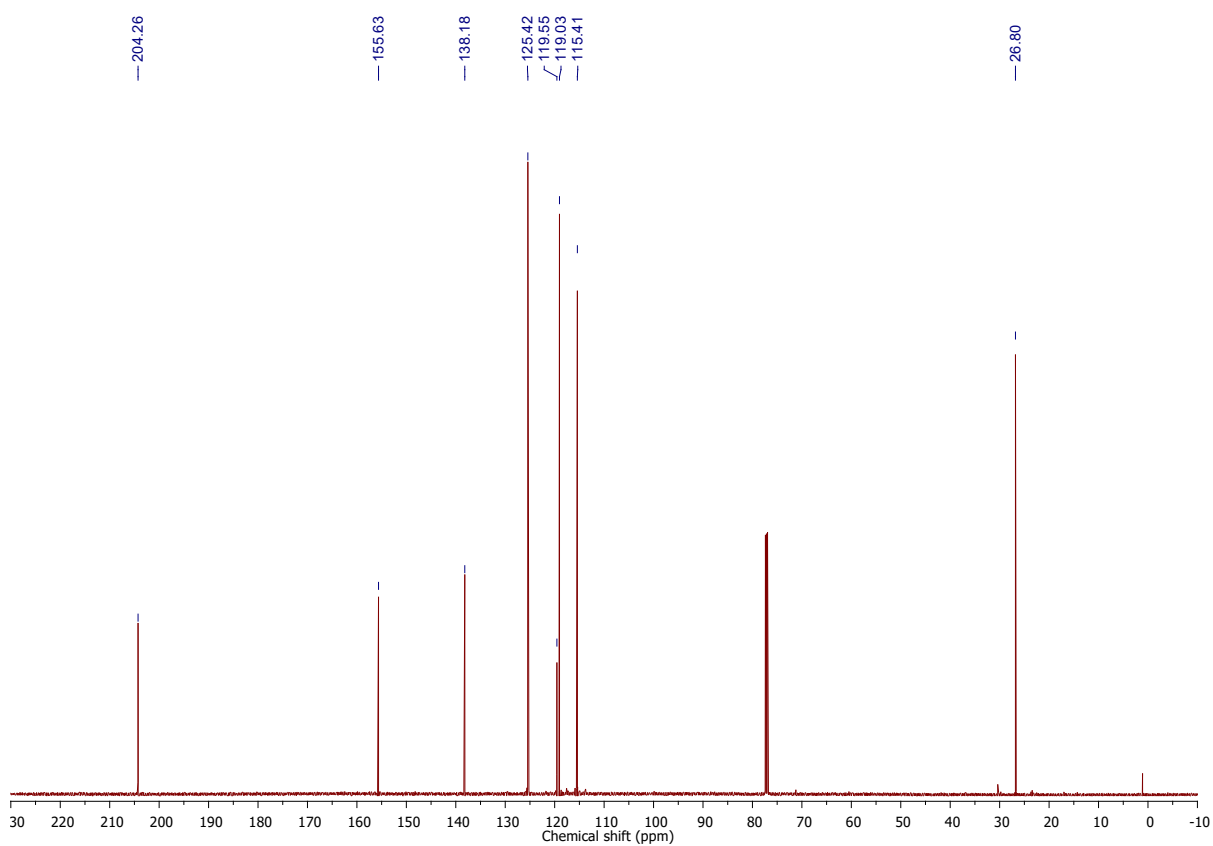

**Figure S53.**  $^1\text{H}$  NMR ( $^1\text{H}$  = 498.557 MHz, 298.1 K,  $\text{DMSO-}d_6$ ) spectrum of **5-NH<sub>2</sub>**.

**Figure S54.**  $^{13}\text{C}$  NMR ( $^{13}\text{C}\{^1\text{H}\}$  = 150.919 MHz, 298.0 K,  $\text{CDCl}_3$ ) spectrum of **5-NH<sub>2</sub>**.

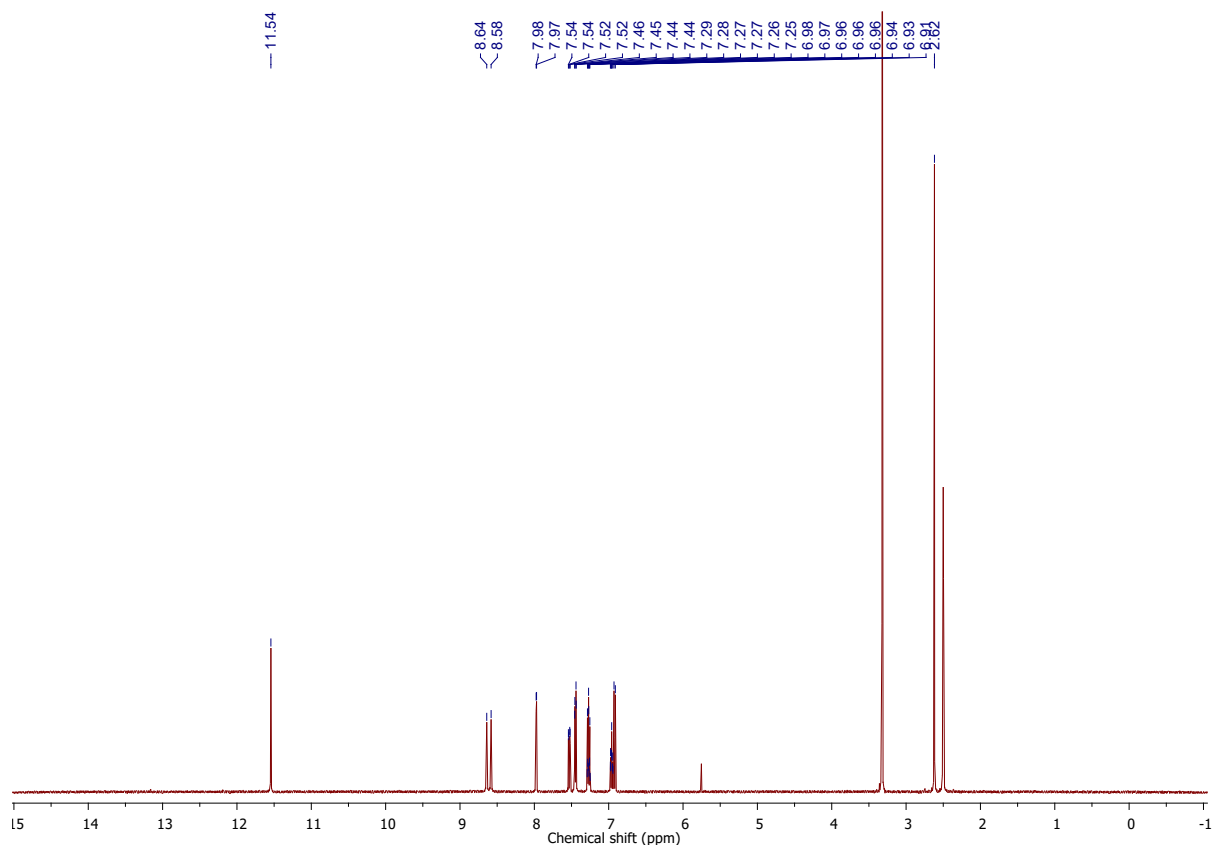

**Figure S55.**  $^1\text{H}$  NMR ( $^1\text{H} = 498.557$  MHz, 298.1 K,  $\text{DMSO-}d_6$ ) spectrum of  $\text{HL}^{5-\text{O}}$ . A chemical shift present at 5.7 ppm (s) is assigned to residual dichloromethane.<sup>15</sup>

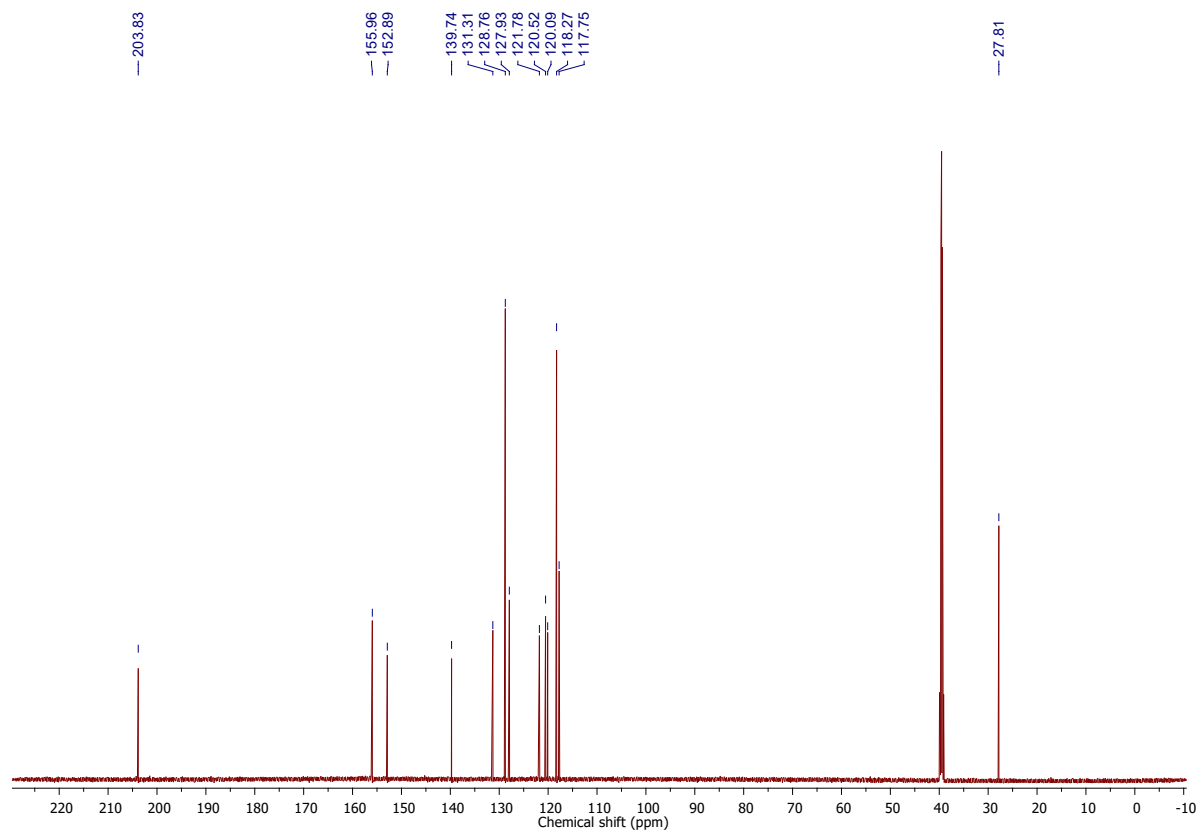

**Figure S56.**  $^{13}\text{C}$  NMR ( $^{13}\text{C}\{^1\text{H}\} = 150.919$  MHz, 298.0 K,  $\text{DMSO-}d_6$ ) spectrum of  $\text{HL}^{5-\text{O}}$ .



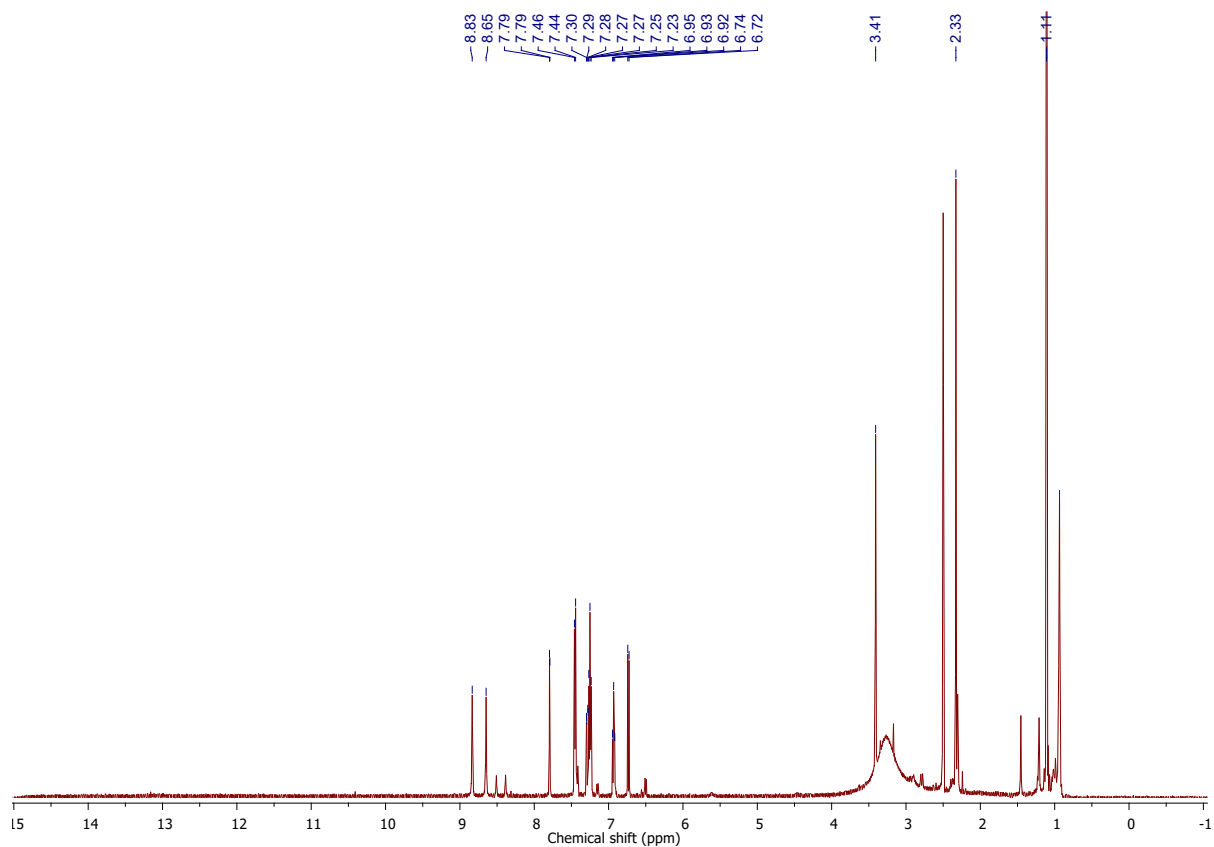

**Figure S57.**  $^1\text{H}$  NMR ( $^1\text{H} = 498.557$  MHz, 298.1 K,  $\text{DMSO-}d_6$ ) spectrum of  $\text{HL}^{5-\text{OH}_2}$ .

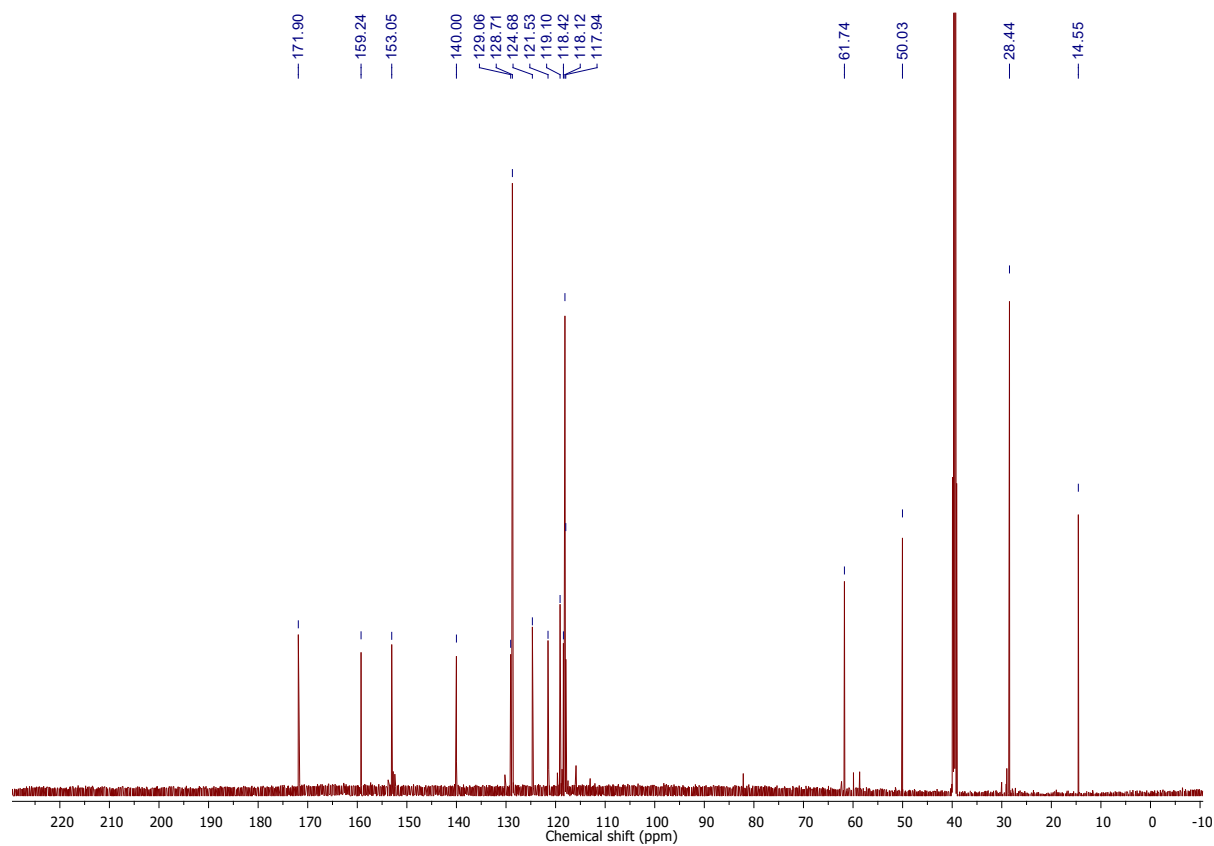

**Figure S58.**  $^{13}\text{C}$  NMR ( $^{13}\text{C}\{^1\text{H}\} = 150.919$  MHz, 298.0 K,  $\text{DMSO-}d_6$ ) spectrum of  $\text{HL}^{5-\text{OH}_2}$ .

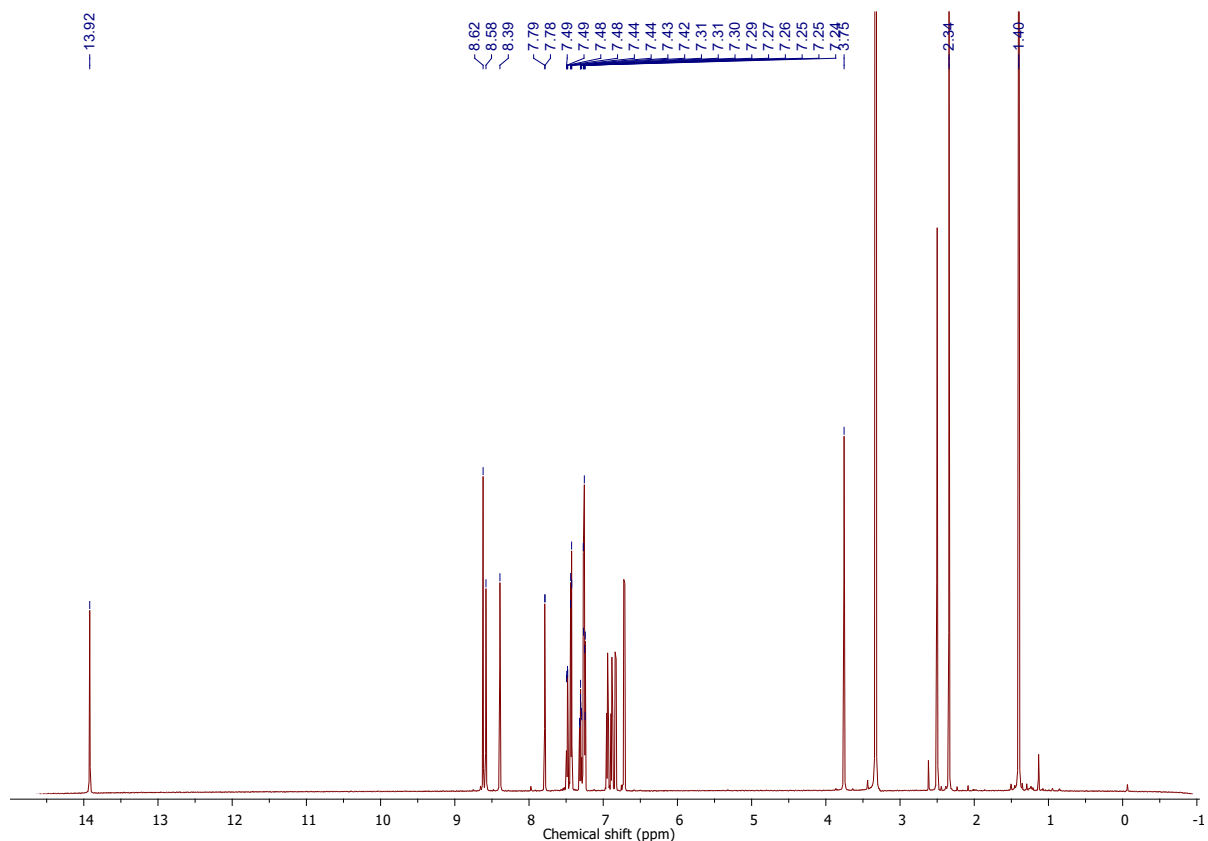

**Figure S59.**  $^1\text{H}$  NMR ( $^1\text{H} = 600.124$  MHz, 298.0 K,  $\text{DMSO-}d_6$ ) spectrum of  $\text{H}_2\text{L}^{5-\text{O}}$ .

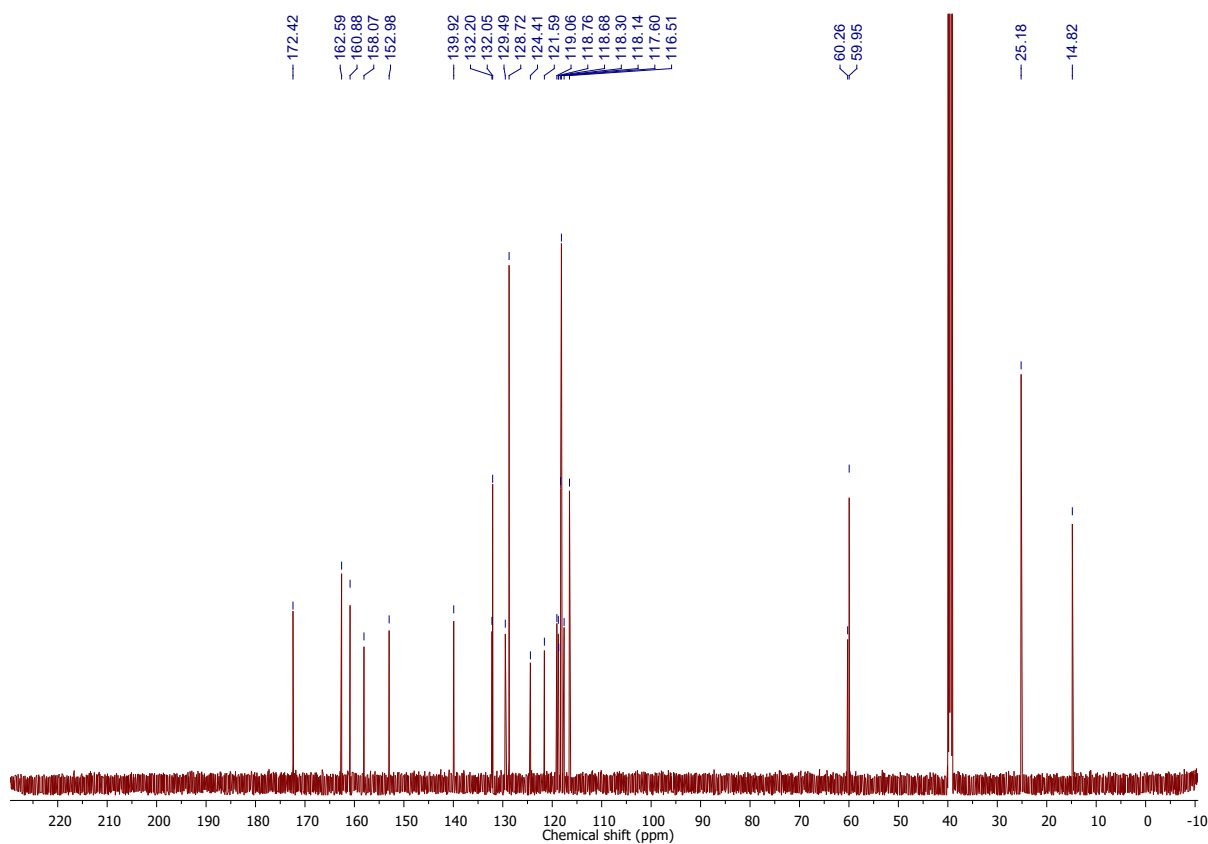

**Figure S60.**  $^{13}\text{C}$  NMR ( $^{13}\text{C}\{^1\text{H}\} = 150.919$  MHz, 298.0 K,  $\text{DMSO-}d_6$ ) spectrum of  $\text{H}_2\text{L}^{5-\text{O}}$ .

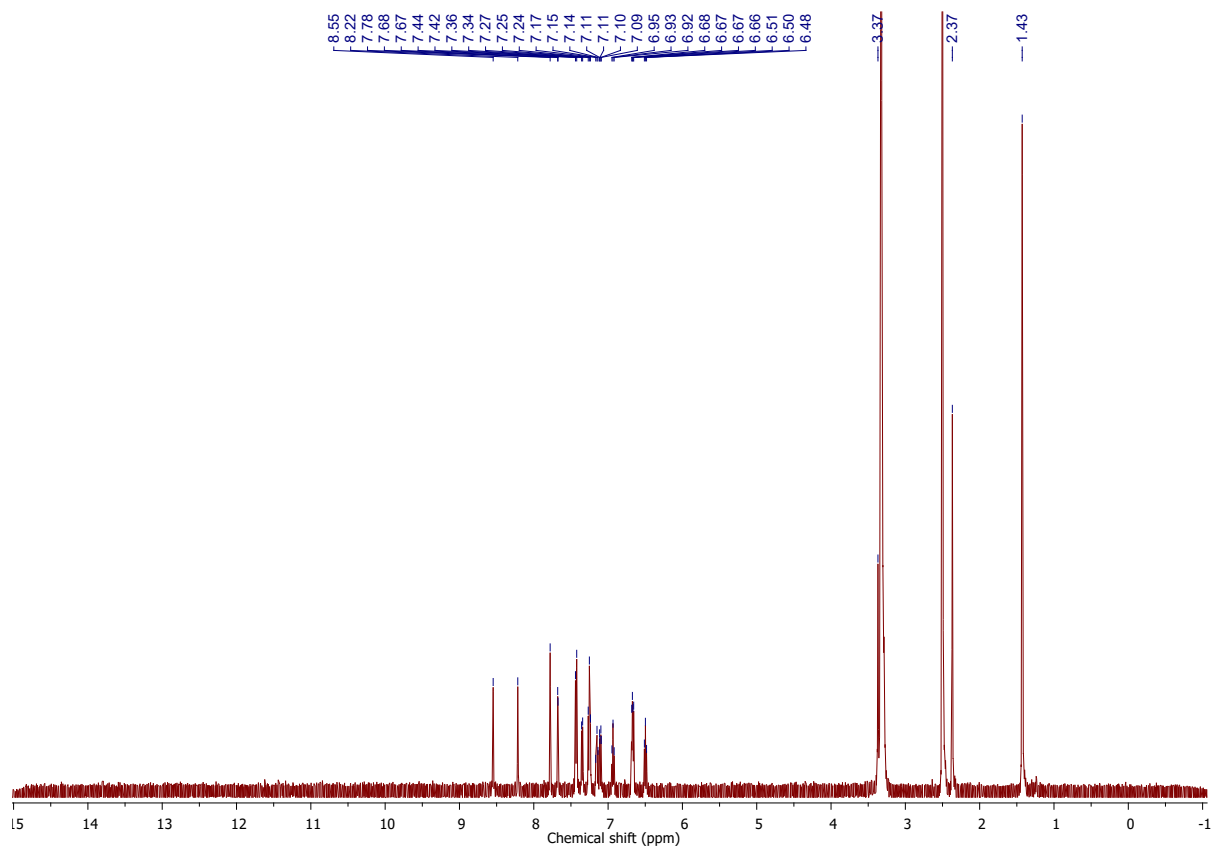

Figure S61.  $^1\text{H}$  NMR ( $^1\text{H} = 498.557$  MHz, 298.1 K,  $\text{DMSO-}d_6$ ) spectrum of  $\text{NiL}^{5-\text{O}}$ .

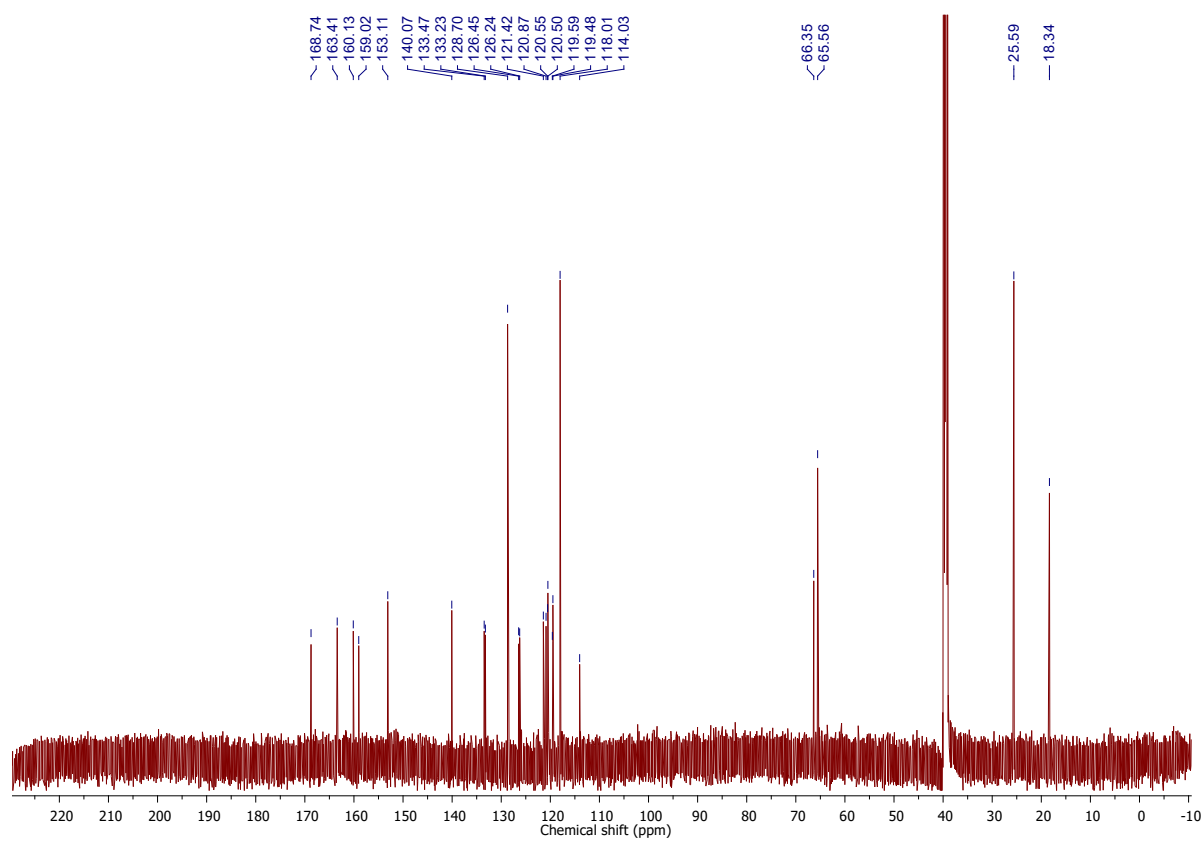

Figure S62.  $^{13}\text{C}$  NMR ( $^{13}\text{C}\{^1\text{H}\} = 150.919$  MHz, 298.0 K,  $\text{DMSO-}d_6$ ) spectrum of  $\text{NiL}^{5-\text{O}}$ .

## References

- 1 C. P. Rosenau, B. J. Jeliet, A. D. Gossert and A. Togni, *Angew. Chem. Int. Ed.*, 2018, **57**, 9528–9533.
- 2 L. J. Farrugia, *J. Appl. Crystallogr.*, 1997, **30**, 565.
- 3 O. V Dolomanov, L. J. Bourhis, R. J. Gildea, J. A. K. Howard and H. Puschmann, *J. Appl. Crystallogr.*, 2009, **42**, 339–341.
- 4 M. Cushman, H. Zhu, R. L. Geahlen and A. J. Kraker, *J. Med. Chem.*, 1994, **37**, 3353–3362.
- 5 *APEX2*, Bruker AXS, Inc., Madison, WI, 2014.
- 6 *SAINT*, Bruker AXS, Inc., Madison, WI, 2013.
- 7 G. M. Sheldrick, *SADABS*, Bruker AXS, Inc., Madison, WI, 2014.
- 8 G. M. Sheldrick, *SHELXTL*, Bruker AXS, Inc., Madison, WI, 2014.
- 9 A. J. C. Wilson, Ed., *International Tables for Crystallography, Volume C*, Kluwer Academic Publishers, Dordrecht, 1st edn., 1992.
- 10 *APEX3*, Bruker AXS, Inc., Madison, WI, 2018.1–0., 2018.
- 11 A. L. Spek, *Acta Crystallogr. Sect. C*, 2015, **71**, 9–18.
- 12 A. L. Spek, *Acta Crystallogr. Sect. D*, 2009, **65**, 148–155.
- 13 G. M. Sheldrick, *CELL\_NOW*, Bruker AXS, Inc., Madison, WI, 2008.
- 14 G. M. Sheldrick, *TWINABS*, Bruker AXS, Inc., Madison, WI, 2012.
- 15 G. R. Fulmer, A. J. M. Miller, N. H. Sherden, H. E. Gottlieb, A. Nudelman, B. M. Stoltz, J. E. Bercaw and K. I. Goldberg, *Organometallics*, 2010, **29**, 2176–2179.
